# Supplementary material for: Chromatin Landscape Distinguishes the Genomic Loci of Hundreds of Androgen-Receptor-Associated LincRNAs From the Loci of Non-associated LincRNAs
Source: PubMed Central journal article supplement (PMC5985396; doi:10.3389/fgene.2018.00132), 2018-04-25
Supplement: Data_Sheet_1.pdf [file Data_Sheet_1.pdf]

**Supplementary Figures for**

**Chromatin landscape distinguishes the genomic loci of  
hundreds of androgen-receptor-associated lincRNAs from the  
loci of non-associated lincRNAs**

Lucas F. daSilva<sup>1,2†</sup>, Felipe C. Beckedorff<sup>1,2†</sup>, Ana C. Ayupe<sup>1</sup>,  
Murilo S. Amaral<sup>1,2</sup>, Vinícius Mesel<sup>2</sup>, Alexandre Videira<sup>1,2</sup>, Eduardo M. Reis<sup>1</sup>,  
João C. Setubal<sup>1,3</sup> and Sergio Verjovski-Almeida<sup>1,2\*</sup>

<sup>1</sup>Departamento de Bioquímica, Instituto de Química, Universidade de São Paulo, 05508-900 São Paulo, SP, Brasil.

<sup>2</sup>Laboratório de Expressão Gênica em Eucariotos, Instituto Butantan, 05503-900 São Paulo, SP, Brasil

<sup>3</sup>Biocomplexity Institute of Virginia Tech, Blacksburg, VA, USA

†These authors have contributed equally to this work.

\*Corresponding author E-mail: [verjo@iq.usp.br](mailto:verjo@iq.usp.br)

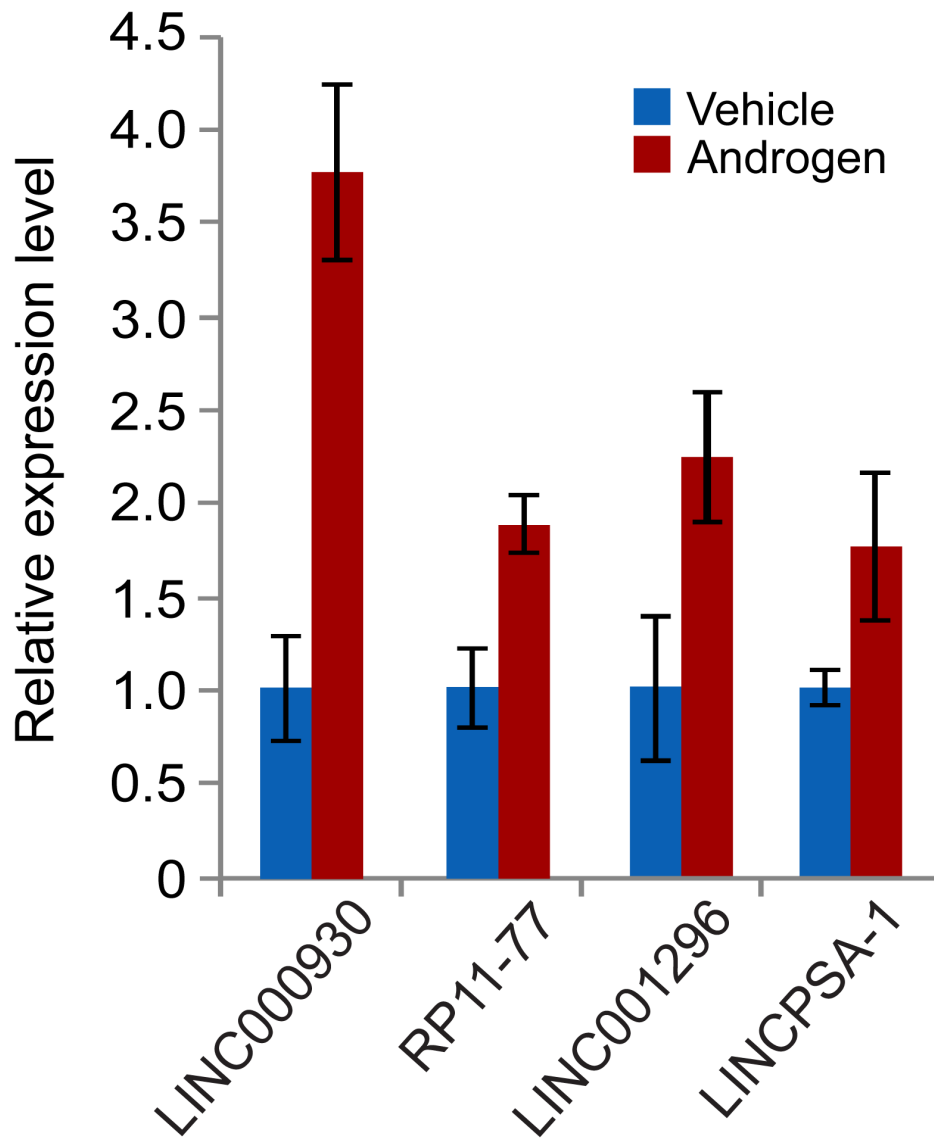

**Fig. S1 - Validation by RT-qPCR of the lincRNAs expression activation induced by androgen in LNCaP cells.** LNCaP cells grown in RPMI 1640 with 10% (w/v) charcoal-stripped FBS were treated for 24 h with 1 nM R1881 or with vehicle (ethanol), the RNA was extracted, the expression of the indicated genes was measured by RT-qPCR and the expression level in the presence of androgen is shown relative to the level in the presence of vehicle.

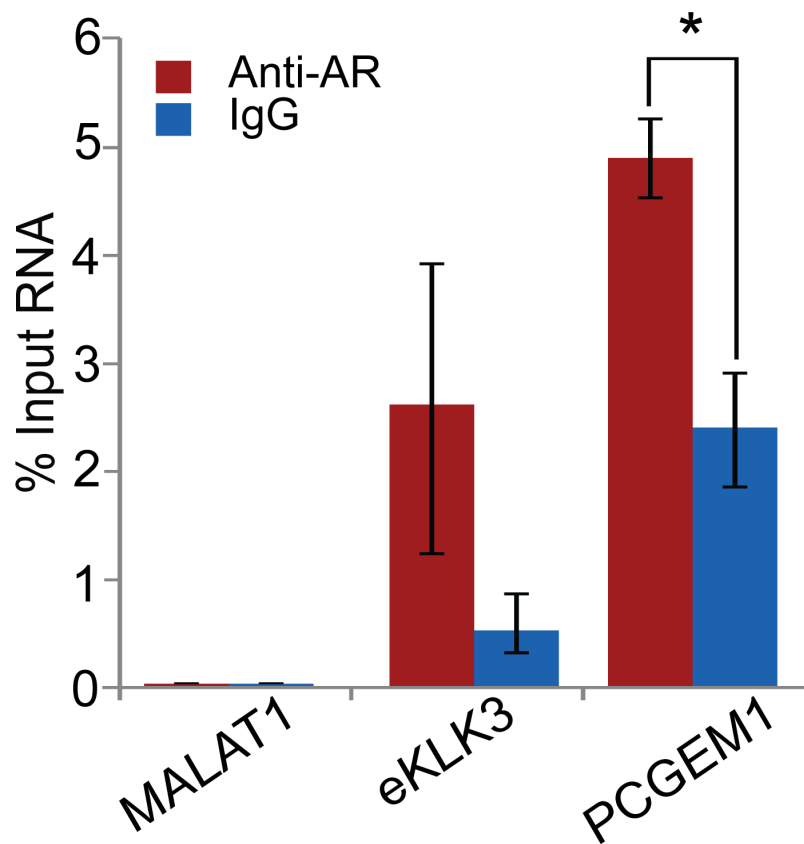

**Fig. S2 – Validation of RNA IP by RT-qPCR.** The endogenous levels of lincRNAs that were co-immunoprecipitated with AR (red bars) were measured by RT-qPCR in LNCaP cells treated for 6 h with 0.1 nM androgen, and the results are shown as % input. Non-specific RNA co-immunoprecipitated with control IgG from non-immunized rabbit was included as a negative control (blue bars). The levels of AR-associated *eKLK3* and *PCGEM1* lincRNAs, known to bind to AR were measured as positive controls, whereas the level of *MALAT1* lincRNA, not expected to bind to AR, was measured as a negative control. (\*) =  $p < 0.05$ , t-test.

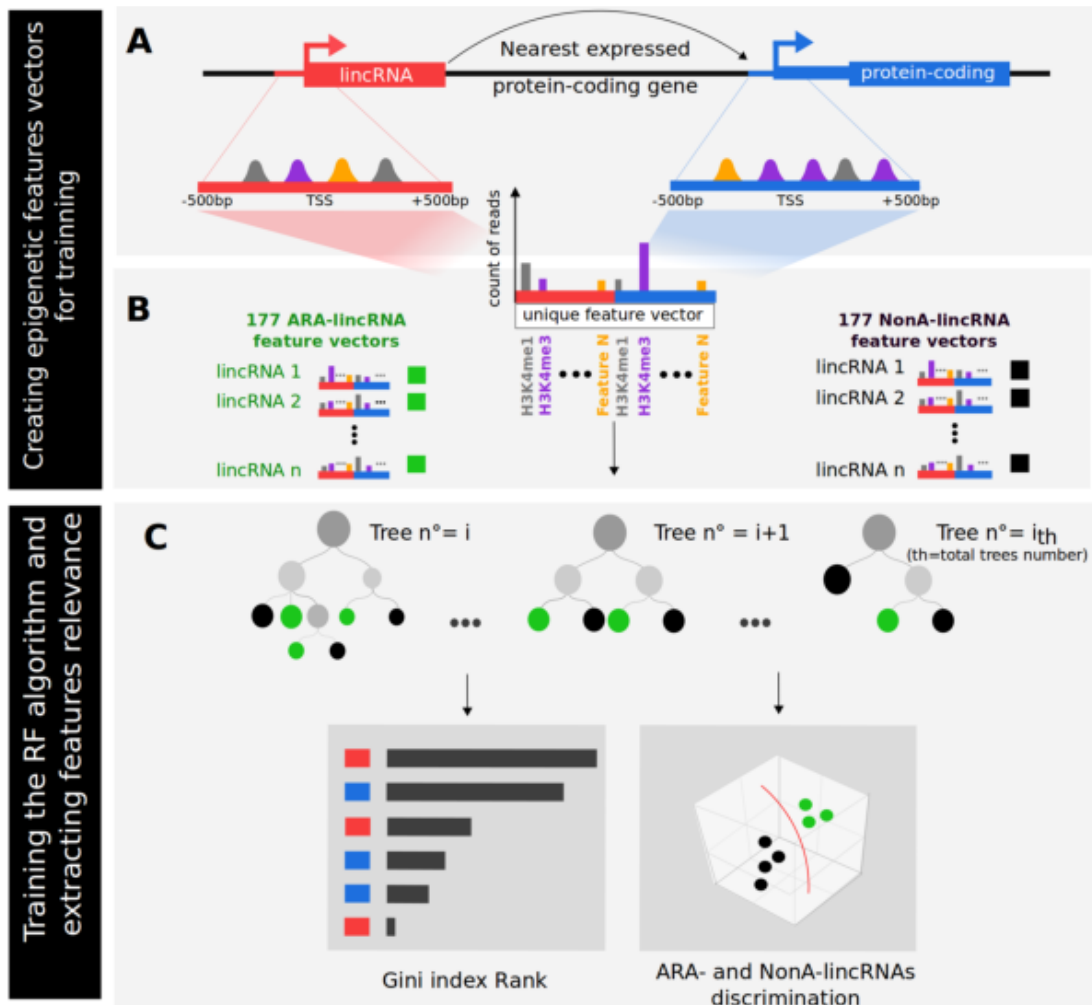

**Fig. S3 - Schematic computational pipeline for identifying the epigenetic signatures at the TSS of lincRNAs and of protein-coding gene neighbors.** (A) Step 1 involved mapping to the genome of the lincRNAs that were obtained in the RIP-seq experiment (red) (both ARA-lincRNAs and NonA-lincRNAs), assigning of a neighbor protein-coding gene (blue) to each lincRNA (ARA- or NonA-lincRNA), and counting the abundance of ChIP-seq/DNase-Seq reads for all epigenetic marks (yellow, purple and gray peaks) that were found at the TSS of each pair of lincRNA-protein-coding gene using a +/- 500 bp window. (B) In Step 2 the computed abundance of the different epigenetic marks were combined and converted into a unique feature vector for each lincRNA and its protein-coding gene neighbor. (C) Step 3 involved machine learning and extraction of epigenetic marks that better separate ARA- from NonA-lincRNAs through the Random Forest algorithm.

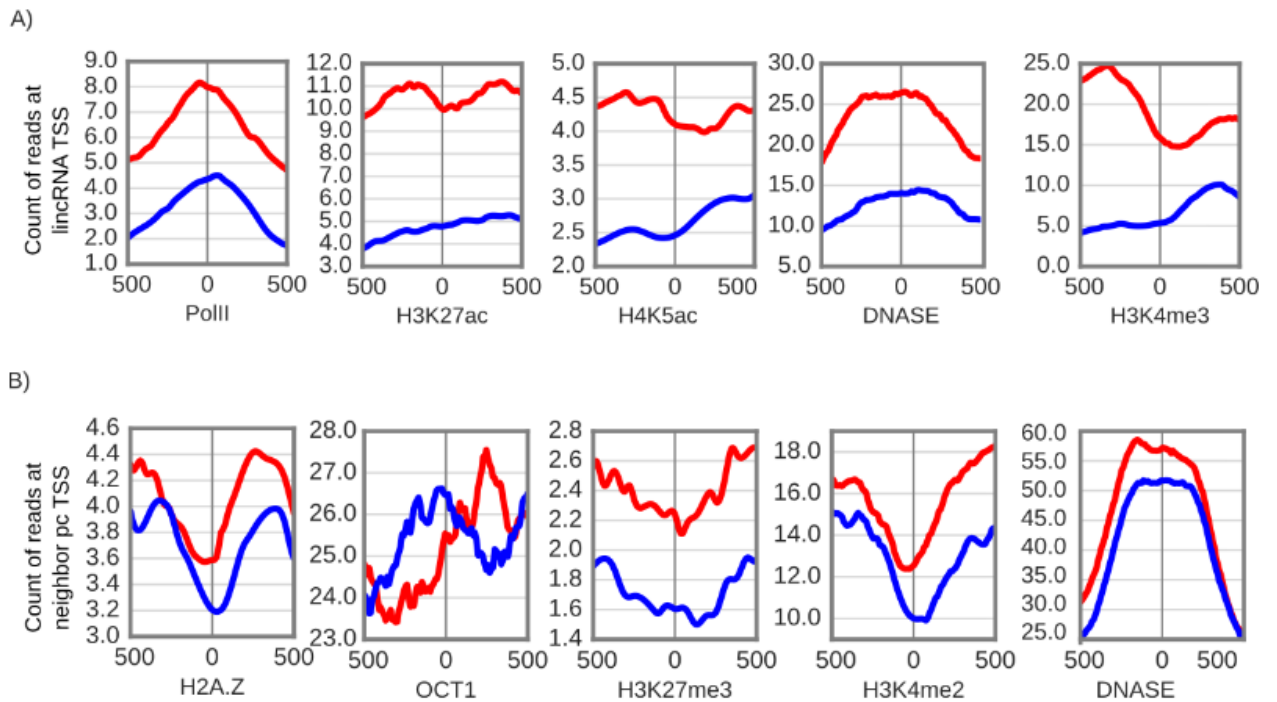

**Fig. S4 - Distribution of epigenetic marks around the TSS of lincRNAs and of their neighbor protein coding genes.** Epigenetic marks shown are the top five most relevant marks of Fig. 3A. A total of 177 ARA-lincRNAs with androgen-activated neighbor protein-coding genes, as well as a control set of 177 Non-A-lincRNAs were analyzed. **(A)** Density distribution of ChIP-Seq read counts of the indicated epigenetic mark around the TSS ( $\pm$  500 bp) of ARA-lincRNAs (red) and of NonA-lincRNAs (blue). **(B)** Density distribution of ChIP-Seq read counts of the indicated epigenetic mark around the TSS ( $\pm$  500 bp) of protein-coding (pc) genes that are neighbor to ARA-lincRNAs (red) and to NonA-lincRNAs (blue).

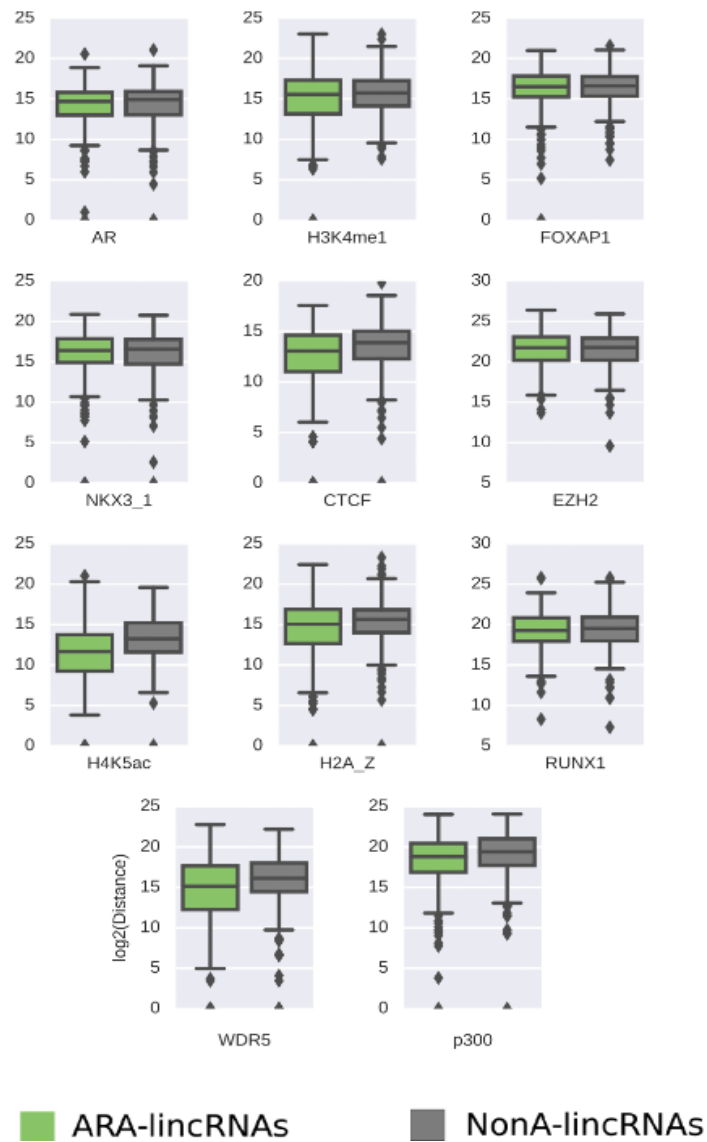

**Fig. S5 - Box plot of  $\log_2$  distance along the genome between the indicated epigenetic mark and the TSS of lincRNAs in LNCaP cells.**  $\log_2$  (distance) in bp between the genomic locations of the indicated epigenetic mark and of the nearest TSS for either the ARA-lincRNAs (green) or the NonA-lincRNAs (gray) expressed in LNCaP cells. A statistical t-test was applied and showed that the average distances were not significantly different between the two groups of lincRNAs, for each of the epigenetic marks shown.
