# Supplementary material for: Chromatin Landscape Distinguishes the Genomic Loci of Hundreds of Androgen-Receptor-Associated LincRNAs From the Loci of Non-associated LincRNAs
Source: Front Genet. 2018 Apr 25;9:132. doi: 10.3389/fgene.2018.00132 (PMC5985396; doi:10.3389/fgene.2018.00132)
Supplement: Supplementary file 2 [file Table_2.XLSX]

## Sheet: Sheet1
Table S2 - Public datasets used in this work.
Epigenetic mark	Download link	Paper reference	Acc. Number
FoxA1	ftp://ftp.ncbi.nlm.nih.gov/geo/samples/GSM686nnn/GSM686926/suppl/GSM686926_Sample8.LNCAP-FoxA1-dht-siCTRL.2.fa.gz	Wang et al. PMID: 21572438	GSM686926
H3K4me1	ftp://ftp.ncbi.nlm.nih.gov/geo/samples/GSM686nnn/GSM686928/suppl/GSM686928_Sample10.LNCAP-H3K4me1-dht-siCTRL.1.fa.gz	Wang et al. PMID: 21572438	GSM686928
H3K4me2	ftp://ftp-trace.ncbi.nlm.nih.gov/sra/sra-instant/reads/ByExp/sra/SRX%2FSRX047%2FSRX047070/SRR122321/SRR122321.sra	Wang et al. PMID: 21572438	GSM686932
H3K4me3	ftp://ftp-trace.ncbi.nlm.nih.gov/sra/sra-instant/reads/ByExp/sra/SRX%2FSRX047%2FSRX047073/SRR122324/SRR122324.sra	Wang et al. PMID: 21572438	GSM686935
H3K36me3	ftp://ftp-trace.ncbi.nlm.nih.gov/sra/sra-instant/reads/ByExp/sra/SRX%2FSRX047%2FSRX047074/SRR122326/SRR122326.sra	Wang et al. PMID: 21572438	GSM686936
H3K27ac	ftp://ftp-trace.ncbi.nlm.nih.gov/sra/sra-instant/reads/ByExp/sra/SRX%2FSRX047%2FSRX047075/SRR122327/SRR122327.sra	Wang et al. PMID: 21572438	GSM686937
H4K5ac	ftp://ftp-trace.ncbi.nlm.nih.gov/sra/sra-instant/reads/ByExp/sra/SRX%2FSRX047%2FSRX047077/SRR122329/SRR122329.sra	Wang et al. PMID: 21572438	GSM686939
H2A.Z	ftp://ftp-trace.ncbi.nlm.nih.gov/sra/sra-instant/reads/ByExp/sra/SRX%2FSRX047%2FSRX047079/SRR122331/SRR122331.sra	Wang et al. PMID: 21572438	GSM686941
p300	ftp://ftp-trace.ncbi.nlm.nih.gov/sra/sra-instant/reads/ByExp/sra/SRX%2FSRX047%2FSRX047081/SRR122333/SRR122333.sra	Wang et al. PMID: 21572438	GSM686943
MED12	ftp://ftp-trace.ncbi.nlm.nih.gov/sra/sra-instant/reads/ByExp/sra/SRX%2FSRX047%2FSRX047083/SRR122335/SRR122335.sra	Wang et al. PMID: 21572438	GSM686945
NKX3-1	ftp://ftp-trace.ncbi.nlm.nih.gov/sra/sra-instant/reads/ByExp/sra/SRX%2FSRX062%2FSRX062359/SRR203392/SRR203392.sra	Tan et al. PMID: 22083957	GSM699633
PolII	ftp://ftp-trace.ncbi.nlm.nih.gov/sra/sra-instant/reads/ByExp/sra/SRX%2FSRX062%2FSRX062363/SRR203398/SRR203398.sra	Tan et al. PMID: 22083957	GSM699637
AR_24	ftp://ftp-trace.ncbi.nlm.nih.gov/sra/sra-instant/reads/ByExp/sra/SRX%2FSRX736%2FSRX736054/SRR1615985/SRR1615985.sra	Takayama et al. PMID: 25537508	GSM1527823
H3K27me3	ftp://ftp-trace.ncbi.nlm.nih.gov/sra/sra-instant/reads/ByExp/sra/SRX%2FSRX736%2FSRX736064/SRR1615995/SRR1615995.sra	Takayama et al. PMID: 25537508	GSM1527833
FOXP1	ftp://ftp-trace.ncbi.nlm.nih.gov/sra/sra-instant/reads/ByExp/sra/SRX%2FSRX736%2FSRX736068/SRR1615999/SRR1615999.sra	Takayama et al. PMID: 25537508	GSM1527837
RUNX1	ftp://ftp-trace.ncbi.nlm.nih.gov/sra/sra-instant/reads/ByExp/sra/SRX%2FSRX736%2FSRX736071/SRR1616002/SRR1616002.sra	Takayama et al. PMID: 25537508	GSM1527840
EZH2	ftp://ftp-trace.ncbi.nlm.nih.gov/sra/sra-instant/reads/ByExp/sra/SRX%2FSRX736%2FSRX736072/SRR1616003/SRR1616003.sra	Takayama et al. PMID: 25537508	GSM1527841
H3T11P	ftp://ftp-trace.ncbi.nlm.nih.gov/sra/sra-instant/reads/ByExp/sra/SRX%2FSRX475%2FSRX475377/SRR1175534/SRR1175534.sra	Kim et al. PMID: 24793694	GSM1333367
WDR5	ftp://ftp-trace.ncbi.nlm.nih.gov/sra/sra-instant/reads/ByExp/sra/SRX%2FSRX475%2FSRX475379/SRR1175536/SRR1175536.sra	Kim et al. PMID: 24793694	GSM1333369
AP4	ftp://ftp-trace.ncbi.nlm.nih.gov/sra/sra-instant/reads/ByExp/sra/SRX%2FSRX059%2FSRX059700/SRR191720/SRR191720.sra	Zhang et al. PMID: 21602269	GSM714610
CTCF	ftp://ftp-trace.ncbi.nlm.nih.gov/sra/sra-instant/reads/ByExp/sra/SRX%2FSRX188%2FSRX188964/SRR575129/SRR575129.sra	ENCODE PMID: 22955987	GSM1006887
DNASE	ftp://ftp-trace.ncbi.nlm.nih.gov/sra/sra-instant/reads/ByExp/sra/SRX%2FSRX100%2FSRX100892/SRR352397/SRR352397.sra	ENCODE PMID: 22955987	GSM816634
LSD1	ftp://ftp-trace.ncbi.nlm.nih.gov/sra/sra-instant/reads/ByExp/sra/SRX/SRX824/SRX824621/SRR1735555/SRR1735555.sra	Metzger et al. PMID: 26751641	GSM1573656
