# Supplementary material for: Chromatin Landscape Distinguishes the Genomic Loci of Hundreds of Androgen-Receptor-Associated LincRNAs From the Loci of Non-associated LincRNAs
Source: Front Genet. 2018 Apr 25;9:132. doi: 10.3389/fgene.2018.00132 (PMC5985396; doi:10.3389/fgene.2018.00132)
Supplement: Supplementary file 5 [file Table_5.XLSX]

## Sheet: protein_coding_androgen_resp
Table S5 - List of LNCaP protein coding genes that are androgen-responsive.
cufflinks_code (from this work)	GeneID (from the comprehensive reference transcriptome, compiled in this work from public lincRNAs datasets; see Methods)	Gene_name	log2ratio(Androgen/Vehicle) in LNCaP (this work)	FDR (0.05)
XLOC_066706	ENST00000272928.3	ACKR3	-4.20144	3.44e-30
XLOC_005131	ENST00000461140.1	PLA2G2A	-3.80088	8.4e-35
XLOC_005146	ENST00000489020.1	CAMK2N1	-3.47127	2.52e-26
XLOC_026670	ENST00000550584.2	PPFIA2	-3.40251	1.22e-13
XLOC_116425	ENST00000420203.1	DDC	-3.32846	8.55e-25
XLOC_089496	ENST00000455472.3	CP	-3.18134	7.55e-16
XLOC_130573	ENST00000374044.1	TNFSF15	-3.12742	1.24e-14
XLOC_023599	ENST00000524830.1	SYTL2	-3.11946	5.12e-24
XLOC_046711	ENST00000543049.1	NLRC5	-3.01229	5.3e-14
XLOC_026673	ENST00000550584.2	PPFIA2	-3.00967	2.54e-13
XLOC_082788	ENST00000496115.1	LRRN1	-2.89211	1.72e-17
XLOC_082790	ENST00000448413.1	SUMF1	-2.81661	9.24e-05
XLOC_073945	ENST00000479904.1	BARD1	-2.81544	9.27e-20
XLOC_095160	ENST00000338206.5	UGT2B15	-2.75697	9e-17
XLOC_017412	ENST00000462406.1	CHST15	-2.74792	4.48e-14
XLOC_128035	ENST00000404796.2	RP11-145E5.5	-2.67611	0.00566229
XLOC_053885	ENST00000584266.1	SRCIN1	-2.63136	3.19e-15
XLOC_019155	ENST00000354445.2	RARRES3	-2.62985	4.92e-07
XLOC_107392	ENST00000368446.1	PKIB	-2.62041	9.08e-16
XLOC_076933	ENST00000246186.6	MMP24	-2.59403	0.010301
XLOC_109788	ENST00000296861.2	TNFRSF21	-2.58726	2.29e-12
XLOC_024032	ENST00000531200.1	MMP7	-2.57248	1.43e-11
XLOC_026668	ENST00000550584.2	PPFIA2	-2.55525	1.43e-11
XLOC_031737	ENST00000543677.1	OASL	-2.51543	0.0114492
XLOC_120548	ENST00000523877.1	SDC2	-2.46799	5.03e-12
XLOC_018508	ENST00000528970.1	LUZP2	-2.46302	6.66e-15
XLOC_015211	ENST00000374201.3	FRMPD2	-2.45899	3.42e-12
XLOC_003700	ENST00000459862.1	CDK18	-2.4331	9.25e-12
XLOC_097371	ENST00000514995.1	DDX60	-2.42816	1.44e-07
XLOC_022409	ENST00000526659.1	UBE2L6	-2.39507	1.82e-09
XLOC_024771	ENST00000527534.1	FEZ1	-2.38039	2.45e-05
XLOC_095885	ENST00000507167.1	TSPAN5	-2.3784	1.92e-11
XLOC_044169	ENST00000335894.4	IQCH	-2.35928	0.0446896
XLOC_095141	ENST00000317746.2	UGT2B17	-2.29907	1.31e-12
XLOC_059489	ENST00000594709.1	TMEM59L	-2.29387	8.84e-06
XLOC_076010	ENST00000360779.3	SDCBP2	-2.26816	9.02e-06
XLOC_023935	ENST00000537480.1	SESN3	-2.25004	1.22e-10
XLOC_075162	ENST00000484638.1	RIN2	-2.2459	4.44e-09
XLOC_038140	ENST00000415220.2	PRKD1	-2.23121	6.49e-07
XLOC_058639	ENST00000582667.1	CBLN2	-2.20767	3.94e-05
XLOC_077608	ENST00000447736.1	KCNG1	-2.1964	2.95e-08
XLOC_012326	ENST00000430603.1	MAP3K8	-2.15697	2.72e-10
XLOC_114206	ENST00000464020.1	ST7	-2.12458	3.26e-11
XLOC_127465	ENST00000382004.3	RFX3	-2.12415	2.72e-10
XLOC_003073	ENST00000465089.2	PBX1	-2.12236	1.72e-10
XLOC_116426	ENST00000490051.1	GRB10	-2.08729	1.71e-11
XLOC_020253	ENST00000530365.1	SORL1	-2.08458	4.21e-10
XLOC_114034	ENST00000472348.1	PCOLCE	-2.08194	1.18e-05
XLOC_086970	ENST00000498301.1	LTF	-2.074	0.000625111
XLOC_026642	ENST00000550584.2	PPFIA2	-2.06237	3.95e-07
XLOC_095357	ENST00000306602.1	CXCL10	-2.05802	0.00017199
XLOC_123834	ENST00000396113.1	NDUFAF6	-2.0538	0.000545151
XLOC_003177	ENST00000367813.3	ATP1B1	-2.03872	3.9e-10
XLOC_056961	ENST00000400256.3	COLEC12	-2.024	8.73e-08
XLOC_128390	ENST00000545044.1	DDX58	-2.01094	5.85e-07
XLOC_066575	ENST00000353339.3	MFF	-2.00632	1.06e-05
XLOC_019093	ENST00000526988.1	BEST1	-1.98634	0.00109845
XLOC_096742	ENST00000509248.1	SLC7A11	-1.98569	9.49e-07
XLOC_104230	ENST00000493208.1	IRF1	-1.98254	7.87e-08
XLOC_006688	ENST00000370971.1	WLS	-1.97024	4.62e-08
XLOC_005191	ENST00000439717.2	HSPG2	-1.96587	1.14e-07
XLOC_024508	ENST00000525794.1	TMPRSS13	-1.95506	4.31e-05
XLOC_107089	ENST00000474553.1	MANEA	-1.95376	7.48e-09
XLOC_110990	ENST00000487824.2	FYN	-1.95055	0.000471629
XLOC_027419	ENST00000540589.2	OAS1	-1.93671	0.000568308
XLOC_106068	ENST00000377803.2	HIST1H4C	-1.92763	5e-06
XLOC_038139	ENST00000415220.2	PRKD1	-1.921	2.07e-09
XLOC_031033	ENST00000547776.2	ANKS1B	-1.91445	3.17e-06
XLOC_053777	ENST00000463941.1	CCL5	-1.90905	0.000227311
XLOC_113605	ENST00000418686.1	AUTS2	-1.88487	1.89e-06
XLOC_006139	ENST00000371885.1	PDZK1IP1	-1.8732	0.0025445
XLOC_056538	ENST00000590532.2	RP11-886H22.1	-1.86457	0.00679613
XLOC_107410	ENST00000368357.3	NCOA7	-1.86428	3.12e-08
XLOC_002987	ENST00000483408.1	VANGL2	-1.8603	1.66e-07
XLOC_051097	ENST00000592325.1	SLFN5	-1.85691	2.73e-08
XLOC_117750	ENST00000393559.1	LAMB1	-1.85295	2.33e-07
XLOC_060235	ENST00000589972.1	RELB	-1.84192	0.00161895
XLOC_022647	ENST00000529548.1	FTH1	-1.83446	1.46e-07
XLOC_097802	ENST00000488562.1	SORBS2	-1.8326	4.23e-06
XLOC_002665	ENST00000489159.1	ADAMTSL4	-1.82972	4.31e-05
XLOC_063058	ENST00000596080.1	CA11	-1.82538	0.000155418
XLOC_101254	ENST00000509048.1	FAM134B	-1.82465	1.18e-07
XLOC_097218	ENST00000587787.1	FAM198B	-1.81816	1.6e-08
XLOC_120950	ENST00000519576.1	TRIB1	-1.81511	7.21e-07
XLOC_078832	ENST00000496783.1	ABCG1	-1.81112	3.96e-07
XLOC_052065	ENST00000578318.1	ITGB4	-1.80988	0.000450776
XLOC_052224	ENST00000571612.1	RP11-1055B8.7	-1.80579	2.6e-05
XLOC_080867	ENST00000494998.1	HMOX1	-1.80541	0.000441056
XLOC_109325	ENST00000417724.1	HLA-DPA1	-1.80356	8.82e-05
XLOC_085369	ENST00000494666.1	SERPINI1	-1.79344	2.78e-06
XLOC_029712	ENST00000548968.1	LRIG3	-1.79165	1.88e-06
XLOC_052410	ENST00000331238.6	RTN4RL1	-1.77919	5.62e-05
XLOC_092953	ENST00000506826.1	TMEM184C	-1.76957	6.17e-08
XLOC_128025	ENST00000404796.2	RP11-145E5.5	-1.76592	0.00715133
XLOC_123829	ENST00000396113.1	NDUFAF6	-1.76575	2.53e-06
XLOC_033117	ENST00000425186.2	CLYBL	-1.75709	0.000563443
XLOC_098137	ENST00000382730.2	NKD2	-1.75369	0.000653997
XLOC_082215	ENST00000497071.1	C1QTNF6	-1.75272	2.11e-05
XLOC_075814	ENST00000456106.1	CDH26	-1.74949	8.8e-07
XLOC_013131	ENST00000371826.3	IFIT2	-1.74602	0.0010726
XLOC_047630	ENST00000570950.1	PRSS22	-1.73903	0.000348793
XLOC_002169	ENST00000526001.1	CSF1	-1.73304	3.66e-05
XLOC_059480	ENST00000594925.1	GDF15	-1.72525	6.91e-07
XLOC_051437	ENST00000344290.5	MAPT	-1.71768	1.22e-06
XLOC_077339	ENST00000537976.1	SDC4	-1.71353	2.16e-07
XLOC_087133	ENST00000494212.1	UBA7	-1.70872	2.39e-05
XLOC_061778	ENST00000527220.1	BST2	-1.70302	0.00785071
XLOC_125363	ENST00000422398.1	SLC1A1	-1.70201	1.89e-06
XLOC_017727	ENST00000526095.1	KCNQ1	-1.70124	0.00389891
XLOC_082947	ENST00000421373.1	FBLN2	-1.69508	0.000952161
XLOC_036163	ENST00000557969.1	PCK2	-1.67366	3.73e-05
XLOC_010922	ENST00000497112.1	AIDA	-1.66694	4.46e-05
XLOC_005738	ENST00000373016.3	FHL3	-1.65961	0.00247814
XLOC_000039	ENST00000379389.4	ISG15	-1.65834	0.00116626
XLOC_099428	ENST00000504456.1	PAM	-1.65815	4.54e-05
XLOC_003760	ENST00000481486.1	RASSF5	-1.65537	1.85e-05
XLOC_016495	ENST00000491114.1	RP11-248J23.7	-1.65472	0.0284902
XLOC_108879	ENST00000377364.3	HIST1H4B	-1.64469	0.00507786
XLOC_051340	ENST00000534876.1	IFI35	-1.64428	0.000202436
XLOC_005991	ENST00000533007.1	SLC6A9	-1.64279	0.000199823
XLOC_055748	ENST00000586300.1	LGALS3BP	-1.63854	4.03e-06
XLOC_070373	ENST00000495056.2	MGAT4A	-1.636	2.24e-05
XLOC_087703	ENST00000469524.1	EIF4E3	-1.63327	7.97e-06
XLOC_027420	ENST00000549918.1	OAS3	-1.61918	0.000251511
XLOC_044167	ENST00000335894.4	IQCH	-1.60978	0.00650153
XLOC_091990	ENST00000514330.1	KIAA1211	-1.60023	0.000345249
XLOC_081116	ENST00000396082.2	UPK3A	-1.58661	0.000517325
XLOC_081939	ENST00000403987.3	LIF	-1.58051	0.000171601
XLOC_096237	ENST00000505132.1	CAMK2D	-1.5757	0.00015286
XLOC_098674	ENST00000503561.3	PARP8	-1.57082	0.000142068
XLOC_076692	ENST00000278886.6	NINL	-1.56849	0.000232041
XLOC_080177	ENST00000400377.3	ICOSLG	-1.56109	0.000574947
XLOC_063647	ENST00000432850.1	RNF144A	-1.55492	3.49e-05
XLOC_062999	ENST00000598636.1	BBC3	-1.54714	0.00881893
XLOC_002495	ENST00000486597.1	TXNIP	-1.54576	1.03e-05
XLOC_047578	ENST00000562055.1	CASKIN1	-1.53872	0.0012384
XLOC_003823	ENST00000473385.1	TRAF5	-1.52379	0.000111554
XLOC_016458	ENST00000339022.5	CYP2C18	-1.51855	0.00155814
XLOC_113262	ENST00000297323.7	ADCY1	-1.51607	0.000188056
XLOC_013122	ENST00000487314.1	FAS	-1.5149	9.72e-05
XLOC_061823	ENST00000596048.1	CERS1	-1.51398	0.00109257
XLOC_091875	ENST00000295213.4	SPATA18	-1.50594	6.65e-05
XLOC_123837	ENST00000396113.1	NDUFAF6	-1.50483	0.0011511
XLOC_055738	ENST00000587052.1	DDC8	-1.49843	1.83e-05
XLOC_130913	ENST00000479747.1	ST6GALNAC4	-1.49774	0.00198643
XLOC_036349	ENST00000554740.1	AKAP6	-1.49344	0.000319923
XLOC_016514	ENST00000265992.5	CCNJ	-1.49293	0.033311
XLOC_113696	ENST00000418185.2	GTF2IRD2B	-1.49266	0.00231499
XLOC_080911	ENST00000431184.1	APOL1	-1.48309	0.00074498
XLOC_013834	ENST00000368571.2	KNDC1	-1.48235	0.0011914
XLOC_025908	ENST00000551667.1	ANO6	-1.47421	4.42e-05
XLOC_092487	ENST00000504044.1	NFKB1	-1.47145	1.89e-05
XLOC_137110	ENST00000468491.1	PDZD4	-1.47137	0.00289818
XLOC_044594	ENST00000388820.4	ADAMTS7	-1.46926	0.00143302
XLOC_100074	ENST00000377906.1	SPINK9	-1.46758	0.000143018
XLOC_034903	ENST00000545028.1	KLHL1	-1.4661	0.000506173
XLOC_075558	ENST00000372813.3	TOMM34	-1.46592	0.0141666
XLOC_037937	ENST00000397359.3	CDH24	-1.46525	0.00108225
XLOC_026640	ENST00000549396.1	PPFIA2	-1.46485	6.75e-05
XLOC_062292	ENST00000361680.2	WDR88	-1.4593	0.0376902
XLOC_124193	ENST00000527600.1	SYBU	-1.45807	0.00104345
XLOC_115559	ENST00000435031.1	CDCA7L	-1.45558	0.000335172
XLOC_003615	ENST00000475698.1	ELF3	-1.45465	3.41e-05
XLOC_066066	ENST00000496976.1	GULP1	-1.45337	0.000129891
XLOC_090943	ENST00000473501.1	MFI2	-1.45307	0.00585038
XLOC_026065	ENST00000552633.2	ASIC1	-1.45008	0.00017958
XLOC_026307	ENST00000550300.1	DTX3	-1.44973	0.00232532
XLOC_044001	ENST00000559306.1	DAPK2	-1.44636	0.000261423
XLOC_041466	ENST00000561407.1	TMOD2	-1.43565	0.000135958
XLOC_093058	ENST00000512272.1	TMEM144	-1.4335	3.63e-05
XLOC_066873	ENST00000485177.1	PXDN	-1.4284	5.23e-05
XLOC_123828	ENST00000396113.1	NDUFAF6	-1.42608	0.000642829
XLOC_015265	ENST00000608287.1	SGMS1	-1.42377	3.59e-05
XLOC_041674	ENST00000558763.1	SMAD3	-1.42238	8.97e-05
XLOC_078566	ENST00000400546.1	NCAM2	-1.42159	1.94e-05
XLOC_131691	ENST00000302196.4	IL1RAPL1	-1.41971	0.000544166
XLOC_062651	ENST00000601713.1	FCGBP	-1.41832	0.000138613
XLOC_090574	ENST00000465178.1	EHHADH	-1.41754	0.000251719
XLOC_017702	ENST00000382171.2	KRTAP5-1	-1.41641	0.00241947
XLOC_000889	ENST00000253063.3	SESN2	-1.41261	0.000520774
XLOC_109054	ENST00000476001.1	ZSCAN31	-1.40999	0.00108024
XLOC_123830	ENST00000396113.1	NDUFAF6	-1.40609	0.0419747
XLOC_075387	ENST00000216968.4	PROCR	-1.40414	0.0104963
XLOC_092972	ENST00000317605.4	MAB21L2	-1.39908	0.00146162
XLOC_001546	ENST00000388876.3	DIO1	-1.39841	0.0076337
XLOC_063813	ENST00000419802.1	KCNS3	-1.39684	0.00199152
XLOC_114900	ENST00000488474.1	PRKAR1B	-1.38932	0.0282805
XLOC_107791	ENST00000367097.3	TULP4	-1.3888	9.37e-05
XLOC_136952	ENST00000417300.1	GABRE	-1.38829	0.0131695
XLOC_060937	ENST00000591572.1	PPAP2C	-1.3877	0.000162258
XLOC_080627	ENST00000480185.1	MMP11	-1.38405	0.0454581
XLOC_099742	ENST00000502849.1	SLC12A2	-1.37683	5.22e-05
XLOC_048654	ENST00000572637.1	DOC2A	-1.3716	0.00368826
XLOC_063903	ENST00000496070.1	GAREML	-1.37015	0.00339154
XLOC_099276	ENST00000503852.1	GPR98	-1.36834	0.000169016
XLOC_053088	ENST00000470794.1	FAM211A	-1.3605	0.001009
XLOC_011522	ENST00000491430.1	IRF2BP2	-1.36044	0.000514303
XLOC_089505	ENST00000493298.1	TM4SF1	-1.35965	0.00901128
XLOC_061517	ENST00000592659.1	ACP5	-1.35939	0.0215072
XLOC_125365	ENST00000485616.1	SPATA6L	-1.35794	0.0258668
XLOC_004275	ENST00000477559.1	GPR137B	-1.35758	0.00106912
XLOC_128033	ENST00000404796.2	RP11-145E5.5	-1.35304	0.0129951
XLOC_106293	ENST00000493699.1	HLA-E	-1.34658	0.000454204
XLOC_082909	ENST00000256458.4	IRAK2	-1.33775	0.00342284
XLOC_091634	ENST00000515612.1	KLHL5	-1.33744	0.000118275
XLOC_035956	ENST00000557498.1	ARHGEF40	-1.33209	0.00129002
XLOC_020992	ENST00000532020.2	APBB1	-1.32767	0.00155843
XLOC_123833	ENST00000396113.1	NDUFAF6	-1.32506	0.00707919
XLOC_019762	ENST00000531521.1	PRSS23	-1.32443	0.00427859
XLOC_107487	ENST00000459624.1	ENPP1	-1.32289	0.00414046
XLOC_027214	ENST00000546729.1	DRAM1	-1.32127	0.000834965
XLOC_024185	ENST00000531386.1	EXPH5	-1.32032	0.000452936
XLOC_106092	ENST00000604202.1	BTN3A2	-1.31773	0.00122911
XLOC_121038	ENST00000520751.1	MYC	-1.31588	0.00688516
XLOC_052743	ENST00000503591.1	TP53	-1.31185	0.000336075
XLOC_021821	ENST00000530814.1	ABTB2	-1.30808	0.000457227
XLOC_127653	ENST00000463305.1	GLDC	-1.30573	0.00277013
XLOC_024298	ENST00000526150.1	COLCA1	-1.30573	0.00080303
XLOC_024858	ENST00000534818.1	CDON	-1.30248	0.000463613
XLOC_081993	ENST00000443175.1	PIK3IP1	-1.29879	0.00167197
XLOC_046675	ENST00000562299.1	LPCAT2	-1.2986	0.00896327
XLOC_083736	ENST00000468576.1	PTPRG	-1.2916	0.000463167
XLOC_018794	ENST00000256996.4	DDB2	-1.29036	0.000528969
XLOC_116932	ENST00000456640.1	MLXIPL	-1.28689	0.00935409
XLOC_111208	ENST00000448815.2	FAM184A	-1.28644	0.00173387
XLOC_066346	ENST00000479988.1	CPS1	-1.28424	0.000350982
XLOC_120559	ENST00000517924.1	LAPTM4B	-1.28403	0.0002459
XLOC_018607	ENST00000528034.1	QSER1	-1.28165	0.00144472
XLOC_095949	ENST00000507358.1	MANBA	-1.28145	0.000314225
XLOC_082224	ENST00000402918.2	ELFN2	-1.27763	0.00348692
XLOC_026287	ENST00000556356.1	LRP1	-1.27667	0.000224247
XLOC_061666	ENST00000595045.1	NOTCH3	-1.27616	0.000440942
XLOC_063678	ENST00000484590.1	ASAP2	-1.27454	0.00053676
XLOC_017697	ENST00000531932.1	BRSK2	-1.27368	0.0386007
XLOC_030517	ENST00000551310.1	ATP2B1	-1.26966	0.000286797
XLOC_020237	ENST00000531220.1	OAF	-1.2685	0.00869747
XLOC_119602	ENST00000004531.10	SLC7A2	-1.26564	0.00502669
XLOC_136647	ENST00000406757.2	GPC3	-1.25928	0.00502145
XLOC_104476	ENST00000514542.1	TMEM173	-1.25676	0.0433054
XLOC_008776	ENST00000609126.1	ARHGEF2	-1.2549	0.00537076
XLOC_037934	ENST00000556896.1	C14orf93	-1.25461	0.00274557
XLOC_023391	ENST00000527491.1	KLHL35	-1.25324	0.0145156
XLOC_007183	ENST00000294671.2	GBP7	-1.2514	0.013563
XLOC_023015	ENST00000533962.1	ALDH3B2	-1.25076	0.00144472
XLOC_029220	ENST00000420388.1	WNT10B	-1.25075	0.0045816
XLOC_098558	ENST00000513078.1	SPEF2	-1.25038	0.0133495
XLOC_005524	ENST00000436464.1	BAI2	-1.25009	0.00376659
XLOC_096055	ENST00000505713.1	PPA2	-1.24851	0.00392407
XLOC_092603	ENST00000512847.1	ALPK1	-1.24753	0.00811696
XLOC_064882	ENST00000409318.1	TBC1D8	-1.24732	0.0427985
XLOC_082797	ENST00000478515.1	ITPR1	-1.24227	0.000880752
XLOC_131586	ENST00000470686.1	REPS2	-1.24021	0.00146631
XLOC_127879	ENST00000506891.1	TTC39B	-1.23747	0.00260731
XLOC_056949	ENST00000575325.1	RP11-683L23.1	-1.2358	0.0269792
XLOC_107772	ENST00000422910.2	ZDHHC14	-1.23364	0.0100335
XLOC_113912	ENST00000289495.5	PPP1R9A	-1.2334	0.0012617
XLOC_027095	ENST00000546925.1	NUDT4	-1.23201	0.000555268
XLOC_092890	ENST00000511255.1	SMAD1	-1.22989	0.00207622
XLOC_019520	ENST00000542481.1	ATG16L2	-1.22926	0.00190737
XLOC_054547	ENST00000290294.3	PRAC1	-1.22456	0.00400002
XLOC_125402	ENST00000492923.1	CD274	-1.22407	0.00390652
XLOC_123827	ENST00000396113.1	NDUFAF6	-1.22259	0.0137229
XLOC_073239	ENST00000420747.1	TFPI	-1.22075	0.000707352
XLOC_110154	ENST00000474593.1	KHDC1	-1.22018	0.0324849
XLOC_031432	ENST00000552800.2	TMEM116	-1.21716	0.0021078
XLOC_113834	ENST00000476330.1	ADAM22	-1.21456	0.00340692
XLOC_126546	ENST00000467049.1	PTPDC1	-1.21151	0.00490258
XLOC_108621	ENST00000479680.1	ATXN1	-1.21057	0.0170102
XLOC_065167	ENST00000479999.1	INSIG2	-1.20417	0.00247814
XLOC_065050	ENST00000496981.1	ACOXL	-1.20236	0.0296909
XLOC_043421	ENST00000559667.1	SLC30A4	-1.20147	0.000977035
XLOC_092755	ENST00000515262.1	HSPA4L	-1.20098	0.00586709
XLOC_061177	ENST00000586883.1	LRG1	-1.20049	0.00527808
XLOC_012294	ENST00000497699.1	BAMBI	-1.19873	0.0189345
XLOC_131978	ENST00000487204.1	CCNB3	-1.19716	0.0400262
XLOC_008562	ENST00000479757.1	GOLPH3L	-1.19047	0.00172937
XLOC_099777	ENST00000464024.1	C5orf56	-1.1873	0.00650116
XLOC_103449	ENST00000507154.1	ERAP1	-1.18503	0.00171697
XLOC_099431	ENST00000510890.1	C5orf30	-1.18494	0.00791285
XLOC_098545	ENST00000513772.1	RAI14	-1.18091	0.00650867
XLOC_037849	ENST00000541965.1	SALL2	-1.17974	0.0126979
XLOC_107700	ENST00000229708.3	ULBP1	-1.17805	0.00910009
XLOC_002796	ENST00000477151.1	RPS27	-1.17792	0.0110105
XLOC_051404	ENST00000588363.1	ADAM11	-1.17759	0.0122153
XLOC_014099	ENST00000453922.1	IL15RA	-1.17605	0.0415066
XLOC_129803	ENST00000297689.3	NFIL3	-1.17498	0.0129665
XLOC_127199	ENST00000351304.7	CEL	-1.17484	0.0363021
XLOC_026646	ENST00000550584.2	PPFIA2	-1.17423	0.0100296
XLOC_055929	ENST00000581954.1	SECTM1	-1.1728	0.00921954
XLOC_117675	ENST00000464874.1	ATXN7L1	-1.17077	0.00189651
XLOC_005729	ENST00000319637.6	EPHA10	-1.16977	0.00361713
XLOC_004280	ENST00000525789.1	LGALS8	-1.16961	0.00138934
XLOC_080662	ENST00000480523.1	SGSM1	-1.16676	0.0172528
XLOC_095926	ENST00000513992.1	DDIT4L	-1.16423	0.0295662
XLOC_063699	ENST00000535335.1	KLF11	-1.16384	0.00717739
XLOC_105699	ENST00000436008.2	SLC22A23	-1.16361	0.0485777
XLOC_085045	ENST00000323534.2	RAP2B	-1.16323	0.00695273
XLOC_091206	ENST00000324989.7	CRMP1	-1.16213	0.0321858
XLOC_007426	ENST00000370176.2	FRRS1	-1.16153	0.0182798
XLOC_016480	ENST00000482068.1	SORBS1	-1.16072	0.00987909
XLOC_072227	ENST00000421365.2	IFIH1	-1.1602	0.0100033
XLOC_025821	ENST00000552226.1	BICD1	-1.15763	0.00121153
XLOC_065191	ENST00000441089.1	PTPN4	-1.1565	0.00189651
XLOC_109309	ENST00000484729.2	HLA-DQB1	-1.15639	0.00271169
XLOC_066270	ENST00000488622.1	PARD3B	-1.15565	0.00312164
XLOC_031645	ENST00000552139.1	TESC	-1.15377	0.0317799
XLOC_012067	ENST00000469025.1	OPTN	-1.15249	0.00829692
XLOC_025569	ENST00000266427.3	ETV6	-1.15038	0.0024636
XLOC_046813	ENST00000544478.1	CES4A	-1.15036	0.0155076
XLOC_084889	ENST00000483507.1	PLS1	-1.14833	0.00982845
XLOC_020063	ENST00000526418.1	DIXDC1	-1.14777	0.00967644
XLOC_113144	ENST00000444777.1	EEPD1	-1.14175	0.00252084
XLOC_051977	ENST00000592348.1	MAP2K6	-1.14151	0.0296265
XLOC_107280	ENST00000368850.3	SLC16A10	-1.14046	0.0311639
XLOC_124293	ENST00000451156.1	TRPS1	-1.13976	0.00266978
XLOC_038677	ENST00000539688.1	AL139099.1	-1.13919	0.0139413
XLOC_055539	ENST00000577932.1	FDXR	-1.1357	0.0115492
XLOC_078666	ENST00000534991.2	C21orf119	-1.132	0.00988788
XLOC_107698	ENST00000367351.3	ULBP2	-1.12917	0.0364892
XLOC_091193	ENST00000515113.1	EVC	-1.1262	0.00229987
XLOC_097024	ENST00000322396.6	PRMT10	-1.12596	0.00293462
XLOC_107173	ENST00000494935.1	SOBP	-1.12379	0.0279425
XLOC_104171	ENST00000469164.1	ACSL6	-1.11812	0.0171691
XLOC_037057	ENST00000556993.1	KIAA0247	-1.11769	0.00250164
XLOC_081804	ENST00000450022.1	TPST2	-1.11736	0.0259902
XLOC_037335	ENST00000203664.5	OTUB2	-1.11735	0.028174
XLOC_059300	ENST00000585791.1	MAST1	-1.11336	0.00962751
XLOC_044600	ENST00000528436.1	CTSH	-1.11286	0.0172395
XLOC_001337	ENST00000493100.1	PLK3	-1.11253	0.0240774
XLOC_085443	ENST00000454872.1	NAALADL2	-1.11012	0.00400554
XLOC_004556	ENST00000422725.1	C1orf233	-1.10789	0.0365254
XLOC_074215	ENST00000423446.1	SERPINE2	-1.10624	0.0311755
XLOC_015486	ENST00000489372.2	JMJD1C	-1.10483	0.00255212
XLOC_116528	ENST00000471168.1	VOPP1	-1.1044	0.00343902
XLOC_012873	ENST00000471240.1	DDIT4	-1.10337	0.00495838
XLOC_005790	ENST00000397360.2	BMP8B	-1.1024	0.0402989
XLOC_095377	ENST00000334306.2	SOWAHB	-1.10013	0.0354759
XLOC_105304	ENST00000519511.1	STC2	-1.09828	0.00578168
XLOC_088577	ENST00000470186.1	ZBTB20	-1.09469	0.0429469
XLOC_029657	ENST00000551220.1	B4GALNT1	-1.09366	0.0120834
XLOC_019529	ENST00000543530.1	ARHGEF17	-1.09023	0.00510455
XLOC_130917	ENST00000494606.1	FAM102A	-1.09004	0.0038982
XLOC_127191	ENST00000350499.6	C9orf9	-1.08832	0.0250036
XLOC_077411	ENST00000339636.3	SLC13A3	-1.07823	0.0255596
XLOC_001230	ENST00000506017.1	KCNQ4	-1.07609	0.0398526
XLOC_003867	ENST00000366983.1	ATF3	-1.07586	0.0389062
XLOC_056430	ENST00000588085.1	MAPRE2	-1.07419	0.0408229
XLOC_105974	ENST00000486622.1	RNF144B	-1.07316	0.0365576
XLOC_108939	ENST00000461899.1	ZNF322	-1.0719	0.0210374
XLOC_063911	ENST00000484882.1	DPYSL5	-1.07038	0.0435137
XLOC_085064	ENST00000493888.1	MME	-1.06908	0.00309849
XLOC_070409	ENST00000409647.1	LONRF2	-1.06715	0.00606792
XLOC_106267	ENST00000461903.1	HLA-A	-1.06668	0.00489244
XLOC_109778	ENST00000371383.2	ENPP5	-1.06572	0.00469894
XLOC_119596	ENST00000517334.1	ZDHHC2	-1.06261	0.00967644
XLOC_052020	ENST00000526858.1	TTYH2	-1.06159	0.0322346
XLOC_125912	ENST00000539465.1	FRMPD1	-1.05918	0.00643902
XLOC_123399	ENST00000519936.1	ZNF704	-1.05794	0.0143644
XLOC_127023	ENST00000471643.1	RALGPS1	-1.0489	0.0105883
XLOC_053077	ENST00000584214.1	CENPV	-1.04618	0.0189052
XLOC_084457	ENST00000273666.6	STXBP5L	-1.0459	0.00515031
XLOC_001888	ENST00000441269.2	LRRC8D	-1.03829	0.00740279
XLOC_078983	ENST00000473212.1	COL18A1	-1.03757	0.0321219
XLOC_109537	ENST00000481599.1	SAYSD1	-1.03687	0.0165288
XLOC_007345	ENST00000370217.3	ARHGAP29	-1.03671	0.00474371
XLOC_044324	ENST00000560167.1	UACA	-1.03551	0.0119347
XLOC_105735	ENST00000328908.5	CDYL	-1.03431	0.0136819
XLOC_011563	ENST00000461994.1	B3GALNT2	-1.03316	0.00677426
XLOC_126534	ENST00000471076.1	WNK2	-1.03152	0.0134382
XLOC_122033	ENST00000312584.3	TNFRSF10D	-1.03132	0.00852614
XLOC_065384	ENST00000281923.2	MGAT5	-1.03027	0.012137
XLOC_064340	ENST00000377990.2	CEP68	-1.02725	0.0172037
XLOC_024743	ENST00000525730.1	SIAE	-1.02723	0.00620386
XLOC_081449	ENST00000552886.1	BID	-1.0271	0.022558
XLOC_068510	ENST00000498516.1	HNRNPLL	-1.02434	0.0231679
XLOC_116069	ENST00000429651.1	KIAA0895	-1.02074	0.0142798
XLOC_117356	ENST00000414884.1	ASNS	-1.0198	0.0142202
XLOC_087850	ENST00000492990.1	ROBO1	-1.0195	0.0192647
XLOC_007799	ENST00000302127.4	KCND3	-1.01866	0.0186606
XLOC_051203	ENST00000579123.1	LASP1	-1.01747	0.0117954
XLOC_031796	ENST00000541244.1	PITPNM2	-1.01424	0.0191489
XLOC_091079	ENST00000331662.3	NAT8L	-1.01374	0.0196594
XLOC_126638	ENST00000487976.2	CCDC180	-1.01337	0.0191965
XLOC_099117	ENST00000502523.1	ATP6AP1L	-1.01337	0.0202997
XLOC_017124	ENST00000468935.2	HSPA12A	-1.01326	0.0174707
XLOC_015722	ENST00000446961.1	LRRC20	-1.01104	0.0491108
XLOC_041876	ENST00000569758.1	NEIL1	-1.00859	0.0115082
XLOC_100225	ENST00000522775.1	CYFIP2	-1.00696	0.0116319
XLOC_119321	ENST00000320248.3	KBTBD11	-1.00565	0.0361085
XLOC_106432	ENST00000374116.3	HMGA1	-1.00439	0.0327815
XLOC_063586	ENST00000596739.1	ZBTB45	-1.00417	0.0219323
XLOC_098875	ENST00000510666.1	OCLN	-1.00384	0.00715133
XLOC_020512	ENST00000526955.1	PKNOX2	-1.00265	0.0259474
XLOC_106099	ENST00000497681.1	BTN3A3	-1.00079	0.0117655
XLOC_089751	ENST00000490337.1	KCNAB1	1.00194	0.0294041
XLOC_037019	ENST00000557319.1	ARG2	1.00238	0.0390791
XLOC_038292	ENST00000553342.1	NFKBIA	1.00456	0.00853419
XLOC_065139	ENST00000478928.1	ACTR3	1.00559	0.0338885
XLOC_001104	ENST00000487114.1	MAP7D1	1.00836	0.0203002
XLOC_091699	ENST00000505705.1	LIMCH1	1.00905	0.01189
XLOC_028713	ENST00000548441.1	ERGIC2	1.0106	0.0199206
XLOC_052490	ENST00000574059.1	UBE2G1	1.01182	0.0333381
XLOC_023959	ENST00000485988.1	MTMR2	1.01401	0.0218599
XLOC_026252	ENST00000548491.1	DGKA	1.01656	0.00828031
XLOC_002845	ENST00000485924.1	RUSC1	1.01702	0.0295112
XLOC_019275	ENST00000534023.1	KLC2	1.01749	0.0111641
XLOC_112920	ENST00000262067.4	TSPAN13	1.01767	0.0271254
XLOC_021109	ENST00000525307.1	CYB5R2	1.02055	0.0273625
XLOC_084868	ENST00000512769.1	ZBTB38	1.02114	0.0113009
XLOC_125368	ENST00000381883.2	PPAPDC2	1.02283	0.011863
XLOC_056690	ENST00000590506.1	NEDD4L	1.02303	0.0174948
XLOC_130518	ENST00000476599.2	INIP	1.02395	0.0220227
XLOC_054597	ENST00000430262.2	ZNF652	1.02595	0.0208504
XLOC_093582	ENST00000512780.1	STX18	1.02732	0.0133785
XLOC_131441	ENST00000381177.1	CD99	1.02746	0.0108939
XLOC_080727	ENST00000491016.1	GAS2L1	1.02813	0.0401651
XLOC_105274	ENST00000239223.3	DUSP1	1.02815	0.00737879
XLOC_006298	ENST00000472983.1	YIPF1	1.02854	0.00913884
XLOC_084504	ENST00000309934.4	SEC22A	1.03055	0.0115445
XLOC_107269	ENST00000480191.1	GTF3C6	1.03101	0.0250514
XLOC_033077	ENST00000376795.6	DNAJC3	1.03306	0.00644574
XLOC_008787	ENST00000484214.1	C1orf85	1.03927	0.0336145
XLOC_093221	ENST00000507001.1	SPCS3	1.04061	0.0255517
XLOC_107323	ENST00000460749.1	NT5DC1	1.04075	0.0163769
XLOC_050565	ENST00000609540.1	ADPRM	1.04435	0.0178838
XLOC_099084	ENST00000509292.1	FAM151B	1.04453	0.0182494
XLOC_021220	ENST00000530570.1	ZBED5	1.04536	0.00576769
XLOC_007669	ENST00000406462.2	GPSM2	1.04596	0.0430757
XLOC_110450	ENST00000515333.1	PGM3	1.05404	0.00585038
XLOC_080266	ENST00000472272.1	LSS	1.05668	0.0205863
XLOC_020632	ENST00000533355.1	GLB1L2	1.06091	0.0270943
XLOC_002503	ENST00000542738.1	RNF115	1.06132	0.00605401
XLOC_035032	ENST00000472949.1	FBXL3	1.06195	0.0188377
XLOC_041218	ENST00000561223.1	C15orf54	1.06215	0.0387295
XLOC_107315	ENST00000368635.4	MARCKS	1.06413	0.00803008
XLOC_004659	ENST00000489730.1	HES2	1.06415	0.0155147
XLOC_008356	ENST00000524525.1	GPR89A	1.07095	0.0100201
XLOC_026140	ENST00000565848.1	NR4A1	1.07223	0.0133916
XLOC_059018	ENST00000588166.1	KDM4B	1.07362	0.0247188
XLOC_015636	ENST00000491102.2	SLC25A16	1.0743	0.00571262
XLOC_039595	ENST00000316836.3	PNMA1	1.07485	0.0161713
XLOC_084214	ENST00000462076.1	CEP97	1.07575	0.0058481
XLOC_006882	ENST00000524778.1	USP33	1.07665	0.00606792
XLOC_114975	ENST00000447791.1	GNA12	1.07768	0.00644574
XLOC_009859	ENST00000472197.1	GLRX2	1.07841	0.00930133
XLOC_065814	ENST00000464647.1	RBM45	1.07927	0.00903819
XLOC_042084	ENST00000560185.1	AKAP13	1.08117	0.00474371
XLOC_016394	ENST00000265997.4	CPEB3	1.08288	0.00455888
XLOC_092897	ENST00000503730.1	MMAA	1.08396	0.00828897
XLOC_032274	ENST00000477876.1	NUPL1	1.08446	0.00524337
XLOC_062703	ENST00000357949.4	SERTAD1	1.08446	0.00987033
XLOC_111678	ENST00000359015.4	MAP3K5	1.08482	0.0217352
XLOC_008785	ENST00000475507.1	PAQR6	1.08961	0.0121024
XLOC_114392	ENST00000468830.1	MKLN1	1.09306	0.00578984
XLOC_126283	ENST00000376730.4	GCNT1	1.09362	0.0140993
XLOC_123461	ENST00000521286.1	C8orf59	1.09402	0.0220227
XLOC_000676	ENST00000411827.1	CDC42	1.09537	0.00913884
XLOC_080804	ENST00000266086.4	SLC5A4	1.09825	0.0330032
XLOC_025157	ENST00000525677.1	THYN1	1.10126	0.00495432
XLOC_120258	ENST00000519289.1	C8orf44-SGK3	1.10274	0.00519248
XLOC_081955	ENST00000312932.9	SEC14L2	1.10351	0.0109089
XLOC_126048	ENST00000377542.3	FAM27C	1.10432	0.00499531
XLOC_059060	ENST00000590444.1	DENND1C	1.10541	0.00303838
XLOC_087082	ENST00000440964.1	SLC25A20	1.11123	0.00661496
XLOC_065068	ENST00000471632.1	TMEM87B	1.11146	0.00376123
XLOC_087025	ENST00000448217.1	SCAP	1.11194	0.00270312
XLOC_005401	ENST00000495230.1	MAP3K6	1.11236	0.0104682
XLOC_119571	ENST00000297324.4	C8orf48	1.11644	0.0421669
XLOC_036365	ENST00000553901.1	FAM177A1	1.11702	0.003189
XLOC_112733	ENST00000433945.1	AMZ1	1.11801	0.0348217
XLOC_115345	ENST00000485475.1	ETV1	1.11818	0.0038791
XLOC_006224	ENST00000465467.1	EPS15	1.11991	0.00209166
XLOC_088683	ENST00000497116.1	COX17	1.12477	0.0215162
XLOC_092851	ENST00000502535.1	SCOC	1.12561	0.0133532
XLOC_082567	ENST00000333761.1	C22orf26	1.12662	0.0123573
XLOC_088895	ENST00000509675.1	KLF15	1.12847	0.0447449
XLOC_114151	ENST00000432748.1	CBLL1	1.12874	0.00865443
XLOC_050785	ENST00000492188.1	SPECC1	1.13079	0.00169665
XLOC_071238	ENST00000494089.1	HS6ST1	1.13413	0.0101667
XLOC_089750	ENST00000490337.1	KCNAB1	1.13426	0.0108939
XLOC_032679	ENST00000298125.5	WDFY2	1.13473	0.00278908
XLOC_109643	ENST00000356542.5	C6orf132	1.13491	0.0228456
XLOC_101202	ENST00000505140.1	ANKH	1.13594	0.00172722
XLOC_116500	ENST00000461536.1	SEC61G	1.13594	0.00782317
XLOC_072512	ENST00000427472.1	OLA1	1.13627	0.00617612
XLOC_092932	ENST00000507449.1	LSM6	1.13838	0.0169013
XLOC_076217	ENST00000493972.1	TRMT6	1.13877	0.0153256
XLOC_086723	ENST00000489559.1	ACAA1	1.14077	0.00407696
XLOC_059821	ENST00000605677.1	FXYD3	1.14158	0.00318381
XLOC_108900	ENST00000244601.3	HIST1H2BG	1.14946	0.00251056
XLOC_088779	ENST00000469317.1	PTPLB	1.15676	0.00874812
XLOC_059046	ENST00000588865.1	CAPS	1.1593	0.00257537
XLOC_104578	ENST00000514773.1	PCDH1	1.15967	0.00179956
XLOC_099107	ENST00000510227.1	ZCCHC9	1.16475	0.00749068
XLOC_100408	ENST00000518204.1	WWC1	1.16525	0.00440413
XLOC_066334	ENST00000281772.9	KANSL1L	1.16567	0.0320327
XLOC_052898	ENST00000580903.1	ZNF18	1.16683	0.0063836
XLOC_014324	ENST00000491458.1	FAM107B	1.16704	0.00562048
XLOC_114162	ENST00000465725.1	DNAJB9	1.16932	0.0125025
XLOC_003132	ENST00000367840.3	DCAF6	1.1705	0.00296426
XLOC_033776	ENST00000357505.6	N4BP2L2	1.17229	0.0224298
XLOC_092737	ENST00000508849.1	SPRY1	1.17888	0.0378163
XLOC_120126	ENST00000522521.1	MRPL15	1.18004	0.0218599
XLOC_040440	ENST00000553994.1	CKB	1.18069	0.0123702
XLOC_118229	ENST00000478726.1	LRRC4	1.18494	0.0128368
XLOC_059131	ENST00000594796.1	2018-03-02	1.18643	0.00379194
XLOC_002794	ENST00000468845.1	CREB3L4	1.18708	0.00178652
XLOC_051781	ENST00000392995.3	PPM1D	1.18853	0.00600401
XLOC_036626	ENST00000553841.1	C14orf28	1.18876	0.00735942
XLOC_064357	ENST00000272369.9	MEIS1	1.1892	0.0287747
XLOC_127345	ENST00000475658.1	ARRDC1	1.19288	0.00551722
XLOC_012817	ENST00000470050.1	HK1	1.19403	0.00967644
XLOC_035938	ENST00000555597.1	RNASE4	1.19484	0.00455217
XLOC_025707	ENST00000537658.1	CMAS	1.19546	0.00571705
XLOC_115051	ENST00000434361.1	TNRC18	1.19582	0.00985099
XLOC_063250	ENST00000596690.1	ZNF649	1.1967	0.00118464
XLOC_106046	ENST00000476458.1	LRRC16A	1.19708	0.00173379
XLOC_034409	ENST00000492258.1	SPRYD7	1.19763	0.0154001
XLOC_022508	ENST00000534063.1	GLYATL1	1.19993	0.0232346
XLOC_027205	ENST00000478139.1	SYCP3	1.20365	0.046087
XLOC_096947	ENST00000513840.1	ZNF827	1.20557	0.000780486
XLOC_128315	ENST00000461679.1	C9orf72	1.21306	0.000693629
XLOC_102684	ENST00000380494.5	COL4A3BP	1.21553	0.00184535
XLOC_110574	ENST00000435041.2	UBE2J1	1.21581	0.00734471
XLOC_056084	ENST00000580949.1	PTPRM	1.21778	0.000589954
XLOC_086693	ENST00000483306.2	LRRFIP2	1.21973	0.000519662
XLOC_042074	ENST00000558077.1	ALPK3	1.22081	0.0051739
XLOC_055905	ENST00000572157.1	PCYT2	1.22087	0.0387794
XLOC_025754	ENST00000540256.1	PPFIBP1	1.22371	0.00208473
XLOC_015914	ENST00000480683.1	KCNMA1	1.22561	0.000978565
XLOC_096982	ENST00000507030.1	SLC10A7	1.22781	0.0395406
XLOC_130678	ENST00000476481.1	FBXW2	1.23247	0.00147376
XLOC_008493	ENST00000369155.2	HIST2H2BE	1.23395	0.000597677
XLOC_052433	ENST00000268989.3	SGSM2	1.23439	0.0497956
XLOC_132812	ENST00000464177.1	TMEM164	1.23743	0.00434808
XLOC_107024	ENST00000506888.1	C6orf165	1.24273	0.00405677
XLOC_042027	ENST00000304191.3	FAM103A1	1.24472	0.00778288
XLOC_083187	ENST00000493707.1	UBE2E1	1.24595	0.000528186
XLOC_035008	ENST00000488955.1	TBC1D4	1.24959	0.00114301
XLOC_095784	ENST00000509340.1	PPM1K	1.2509	0.00250164
XLOC_013527	ENST00000449616.2	ATRNL1	1.25354	0.0316641
XLOC_041670	ENST00000558937.1	SMAD6	1.25434	0.035453
XLOC_131399	ENST00000361681.2	MT-ND6	1.25745	0.000399507
XLOC_041499	ENST00000570794.1	C15orf65	1.25756	0.014866
XLOC_091250	ENST00000512966.1	SH3TC1	1.25839	0.00327879
XLOC_119629	ENST00000517546.1	INTS10	1.25963	0.00376206
XLOC_076780	ENST00000434194.1	BCL2L1	1.26194	0.0033125
XLOC_003302	ENST00000367619.3	SOAT1	1.26387	0.0019524
XLOC_080816	ENST00000266086.4	SLC5A4	1.26758	0.0319973
XLOC_127369	ENST00000382389.1	CBWD1	1.26901	0.000384508
XLOC_122443	ENST00000524409.1	PPAPDC1B	1.27727	0.000472023
XLOC_071299	ENST00000441670.1	CCDC74B	1.28166	0.0452105
XLOC_133885	ENST00000474266.1	RPS6KA3	1.28202	0.00683745
XLOC_028964	ENST00000549190.1	PPHLN1	1.28402	0.0147935
XLOC_127347	ENST00000460486.1	EHMT1	1.28509	0.000406524
XLOC_035961	ENST00000557606.1	RPGRIP1	1.28544	0.0482924
XLOC_100075	ENST00000508176.1	FBXO38	1.28573	0.000880404
XLOC_093306	ENST00000504273.1	SNX25	1.28914	0.000354703
XLOC_080806	ENST00000266086.4	SLC5A4	1.29255	0.00827296
XLOC_041664	ENST00000566326.1	MAP2K1	1.29304	0.00110798
XLOC_120390	ENST00000426744.2	ZBTB10	1.29613	0.000948541
XLOC_130129	ENST00000375077.4	CORO2A	1.30421	0.00189471
XLOC_066714	ENST00000489967.1	MLPH	1.30485	0.000136506
XLOC_114981	ENST00000489665.1	AMZ1	1.31109	0.00226722
XLOC_014013	ENST00000380946.3	KLF6	1.31181	0.00168811
XLOC_078695	ENST00000439593.1	DONSON	1.3147	0.00894639
XLOC_002834	ENST00000479579.1	SLC50A1	1.31521	0.000390538
XLOC_107218	ENST00000458487.1	SMPD2	1.3163	0.000617534
XLOC_103929	ENST00000506980.2	DTWD2	1.31882	0.000643776
XLOC_099003	ENST00000512053.1	HMGCR	1.31996	0.00309375
XLOC_137087	ENST00000356661.5	MAGEA1	1.32051	0.0356448
XLOC_034161	ENST00000493016.1	TSC22D1	1.32335	0.000153296
XLOC_133969	ENST00000492081.1	ACOT9	1.32613	0.000752247
XLOC_127572	ENST00000223858.4	RLN1	1.32941	0.000153484
XLOC_080820	ENST00000266086.4	SLC5A4	1.33266	0.000589625
XLOC_099027	ENST00000508410.1	IQGAP2	1.33296	0.00133964
XLOC_092438	ENST00000506632.1	PDLIM5	1.33713	0.0015617
XLOC_119518	ENST00000529521.1	FDFT1	1.33736	0.00302793
XLOC_008621	ENST00000478109.1	S100A11	1.33947	0.00340444
XLOC_080819	ENST00000266086.4	SLC5A4	1.33992	0.00288681
XLOC_036691	ENST00000298316.5	ARF6	1.34012	0.00223471
XLOC_041910	ENST00000560833.1	RCN2	1.34112	0.00024481
XLOC_070435	ENST00000441435.1	RPL31	1.34889	0.0186563
XLOC_101644	ENST00000508434.1	C1QTNF3	1.34931	8.64e-05
XLOC_080817	ENST00000266086.4	SLC5A4	1.35413	0.00645492
XLOC_037404	ENST00000553313.1	EML1	1.35501	0.00196093
XLOC_041810	ENST00000568535.1	BBS4	1.35695	0.000570363
XLOC_003236	ENST00000470017.1	PRDX6	1.35819	0.0022108
XLOC_045082	ENST00000268130.7	WDR93	1.35953	0.00470087
XLOC_078840	ENST00000466472.1	PDE9A	1.36364	0.000658514
XLOC_074783	ENST00000310397.8	SNED1	1.36751	0.0260314
XLOC_058878	ENST00000564572.1	CNN2	1.36901	0.00592265
XLOC_046109	ENST00000564349.1	ERI2	1.37276	0.0290258
XLOC_107672	ENST00000367467.3	SASH1	1.37401	0.000477315
XLOC_066679	ENST00000492481.1	SPP2	1.37461	0.008321
XLOC_107563	ENST00000453452.1	HEBP2	1.37544	0.000159749
XLOC_047541	ENST00000389176.3	CCDC154	1.37576	0.0090972
XLOC_099912	ENST00000302091.5	SPATA24	1.3763	0.000189564
XLOC_082030	ENST00000248980.4	RFPL2	1.37676	0.00557024
XLOC_000626	ENST00000427894.1	NBL1	1.37812	0.00106688
XLOC_063255	ENST00000599430.1	ZNF841	1.38731	9e-05
XLOC_032253	ENST00000332018.4	C1QTNF9	1.38793	0.000216876
XLOC_114976	ENST00000489665.1	AMZ1	1.3937	0.0467178
XLOC_024164	ENST00000524991.1	SLC35F2	1.39794	0.00038768
XLOC_103710	ENST00000505499.1	EFNA5	1.3991	0.00483346
XLOC_052002	ENST00000245479.2	SOX9	1.40149	0.00013525
XLOC_001955	ENST00000603526.1	FNBP1L	1.4051	7.79e-05
XLOC_061605	ENST00000397557.1	AC008686.1	1.40662	0.00174366
XLOC_096981	ENST00000502607.1	SLC10A7	1.40723	5.46e-05
XLOC_111784	ENST00000536159.1	CITED2	1.40991	0.000995283
XLOC_031798	ENST00000563178.1	MPHOSPH9	1.41365	0.000272146
XLOC_019915	ENST00000536441.1	SESN3	1.42657	0.02783
XLOC_117645	ENST00000448563.1	ORC5	1.42935	0.000350695
XLOC_036876	ENST00000531937.1	PPM1A	1.42961	6.75e-05
XLOC_113955	ENST00000314018.2	BHLHA15	1.43267	0.000448496
XLOC_126864	ENST00000473413.1	ATP6V1G1	1.43331	0.00091985
XLOC_105873	ENST00000313243.2	MAK	1.43696	0.00189529
XLOC_123372	ENST00000602950.1	TPD52	1.44089	6.21e-05
XLOC_114520	ENST00000493595.1	TRIM24	1.44299	0.000250179
XLOC_020998	ENST00000529529.1	TRIM3	1.44534	0.000162081
XLOC_017936	ENST00000533392.1	PARVA	1.44787	2.77e-05
XLOC_119339	ENST00000325203.5	ANGPT2	1.44844	0.0398526
XLOC_039177	ENST00000555185.1	PRKCH	1.44914	0.024422
XLOC_073531	ENST00000449152.1	STK17B	1.45315	7.21e-05
XLOC_003045	ENST00000486089.1	UAP1	1.45404	0.000152599
XLOC_080814	ENST00000266086.4	SLC5A4	1.45718	6.01e-05
XLOC_033562	ENST00000469167.1	MIPEP	1.45765	3.52e-05
XLOC_004610	ENST00000461795.1	MEGF6	1.46403	0.000805606
XLOC_099913	ENST00000302091.5	SPATA24	1.46686	0.000449666
XLOC_025755	ENST00000228425.6	PPFIBP1	1.47194	0.000498462
XLOC_063184	ENST00000270593.1	ACPT	1.47216	0.0476424
XLOC_002981	ENST00000488858.1	PEA15	1.47269	0.000103192
XLOC_080801	ENST00000266086.4	SLC5A4	1.47272	8.49e-05
XLOC_063253	ENST00000595114.1	ZNF615	1.48394	6.3e-05
XLOC_008110	ENST00000476640.1	HMGCS2	1.48411	0.000262613
XLOC_014885	ENST00000374694.1	FZD8	1.48591	0.00332607
XLOC_046050	ENST00000574761.1	ABCC1	1.48738	6.27e-05
XLOC_108891	ENST00000396984.1	HIST1H2BC	1.4878	2.93e-05
XLOC_003414	ENST00000477517.1	C1orf21	1.4925	0.000196695
XLOC_066101	ENST00000427152.1	MYO1B	1.49325	1.87e-05
XLOC_003046	ENST00000271469.3	UAP1	1.49365	0.000103162
XLOC_070299	ENST00000488952.1	DUSP2	1.4984	0.00976674
XLOC_046051	ENST00000399408.2	ABCC1	1.50284	0.000519662
XLOC_055922	ENST00000579410.1	FASN	1.50514	0.00216918
XLOC_085126	ENST00000468409.1	MFSD1	1.50727	4.54e-05
XLOC_123803	ENST00000481490.2	FSBP	1.50829	0.000218208
XLOC_011069	ENST00000464927.1	ACBD3	1.51129	6.41e-05
XLOC_113168	ENST00000425345.1	EPDR1	1.51273	0.000683481
XLOC_003439	ENST00000367500.4	SWT1	1.51815	6.66e-05
XLOC_032312	ENST00000460403.1	POMP	1.52064	0.000602417
XLOC_125876	ENST00000474050.1	GLIPR2	1.52407	7.48e-05
XLOC_086729	ENST00000346219.3	DLEC1	1.52666	0.00017242
XLOC_004815	ENST00000361445.4	MTOR	1.52726	6.21e-05
XLOC_129117	ENST00000333421.6	ABHD17B	1.53331	3.62e-05
XLOC_046300	ENST00000568312.1	KIF22	1.53427	0.0023666
XLOC_000268	ENST00000476934.1	ANGPTL7	1.54276	0.000208101
XLOC_000632	ENST00000478803.1	PLA2G5	1.54443	0.000765667
XLOC_109897	ENST00000370913.5	ELOVL5	1.54602	3.89e-05
XLOC_005111	ENST00000482808.1	CAPZB	1.54881	0.000182292
XLOC_066326	ENST00000473543.1	MAP2	1.54978	0.000603516
XLOC_100141	ENST00000510472.1	HMGXB3	1.55047	5.38e-05
XLOC_079789	ENST00000456084.1	SYNJ1	1.55067	4.25e-05
XLOC_124471	ENST00000530065.1	ATAD2	1.55154	0.00531883
XLOC_081958	ENST00000312932.9	SEC14L2	1.55212	0.000316206
XLOC_114983	ENST00000433945.1	AMZ1	1.55321	0.00921954
XLOC_080818	ENST00000266086.4	SLC5A4	1.55647	0.000831846
XLOC_125342	ENST00000478776.1	VLDLR	1.55936	5.35e-06
XLOC_051961	ENST00000589316.1	WIPI1	1.56058	0.0137992
XLOC_055000	ENST00000585368.1	APPBP2	1.561	5.78e-06
XLOC_089753	ENST00000467733.1	SSR3	1.56982	1.42e-05
XLOC_070429	ENST00000485851.1	TBC1D8	1.56997	2.18e-05
XLOC_060512	ENST00000597461.1	KLK2	1.57075	0.00159673
XLOC_063226	ENST00000335624.4	VSIG10L	1.57115	0.000199823
XLOC_019908	ENST00000278505.4	ENDOD1	1.57128	0.00101289
XLOC_080223	ENST00000600921.1	PRED57	1.5724	0.00255362
XLOC_120005	ENST00000315792.3	C8orf4	1.57246	0.000979322
XLOC_002888	ENST00000485135.1	TMEM79	1.57392	0.000176231
XLOC_122026	ENST00000251822.6	RHOBTB2	1.57578	0.0410048
XLOC_093315	ENST00000505916.1	LRP2BP	1.57627	0.0340968
XLOC_043835	ENST00000558646.1	MYO1E	1.57834	0.000137289
XLOC_056320	ENST00000588004.1	LAMA3	1.57863	3.13e-05
XLOC_109523	ENST00000327475.6	DNAH8	1.57981	0.00351129
XLOC_097781	ENST00000511404.1	LRP2BP	1.57995	1.15e-05
XLOC_032970	ENST00000218652.7	NDFIP2	1.58076	8.62e-05
XLOC_002156	ENST00000351050.3	GNAT2	1.58265	0.00158217
XLOC_118139	ENST00000476131.1	CADPS2	1.58985	2.08e-05
XLOC_086728	ENST00000308059.6	DLEC1	1.59109	0.00138245
XLOC_004157	ENST00000366688.3	SPHAR	1.59592	1.89e-05
XLOC_018606	ENST00000257836.3	PRRG4	1.59936	1.93e-05
XLOC_117665	ENST00000334877.4	KMT2E	1.59942	0.0152069
XLOC_104928	ENST00000520461.1	FAXDC2	1.60534	1.65e-05
XLOC_121792	ENST00000530693.1	LONRF1	1.60851	4.49e-06
XLOC_080813	ENST00000266086.4	SLC5A4	1.61145	0.0035232
XLOC_074780	ENST00000434791.1	MTERFD2	1.61154	5.56e-06
XLOC_120479	ENST00000523719.1	SLC26A7	1.61399	0.00116586
XLOC_093308	ENST00000362004.3	LRP2BP	1.61403	0.0026
XLOC_121423	ENST00000523120.1	ANGPT2	1.61905	0.000896272
XLOC_114978	ENST00000489665.1	AMZ1	1.62691	8.97e-05
XLOC_012097	ENST00000357447.2	FRMD4A	1.63039	0.0370497
XLOC_048370	ENST00000523065.1	ACSM1	1.63519	2.73e-05
XLOC_003437	ENST00000367510.3	RNF2	1.63923	1.06e-05
XLOC_074772	ENST00000401884.1	SNED1	1.64308	9.46e-06
XLOC_103817	ENST00000379617.2	TRIM36	1.64964	8.21e-05
XLOC_080810	ENST00000266086.4	SLC5A4	1.65275	0.00843131
XLOC_010364	ENST00000468523.1	ELK4	1.65532	2.9e-05
XLOC_029607	ENST00000552408.1	PRIM1	1.65684	0.000117448
XLOC_035393	ENST00000538287.1	ABCC4	1.65731	8.64e-06
XLOC_094623	ENST00000504360.1	BEND4	1.65837	8.48e-07
XLOC_119612	ENST00000520546.1	NAT1	1.66091	2.18e-06
XLOC_060511	ENST00000422986.2	KLK3	1.66194	0.000108751
XLOC_002298	ENST00000495965.1	ATP1A1	1.66385	3.06e-06
XLOC_005719	ENST00000485039.1	MEAF6	1.6673	3.3e-06
XLOC_057556	ENST00000587223.1	NPC1	1.66735	1.26e-05
XLOC_026723	ENST00000549919.1	TMTC2	1.66752	1.45e-05
XLOC_106962	ENST00000509894.1	TTK	1.66781	0.00345333
XLOC_017859	ENST00000534552.1	PPFIBP2	1.68176	2.79e-05
XLOC_008499	ENST00000369135.4	OTUD7B	1.68236	9.8e-06
XLOC_019650	ENST00000527881.1	TSKU	1.68238	1.97e-06
XLOC_031664	ENST00000542692.1	TAOK3	1.68465	0.000189368
XLOC_135037	ENST00000423432.2	PIN4	1.68788	0.0318538
XLOC_074769	ENST00000310397.8	SNED1	1.69463	6.22e-05
XLOC_103765	ENST00000508215.1	STARD4	1.70025	6.94e-06
XLOC_118424	ENST00000421797.2	MKLN1	1.70289	0.0100335
XLOC_131643	ENST00000462639.1	SAT1	1.70562	9.14e-07
XLOC_023580	ENST00000526147.1	DLG2	1.70783	6.07e-06
XLOC_013073	ENST00000372037.3	BMPR1A	1.71611	5.85e-07
XLOC_101643	ENST00000505056.1	SLC45A2	1.7369	3.5e-05
XLOC_043640	ENST00000558714.1	TMOD3	1.74003	0.000109211
XLOC_080807	ENST00000266086.4	SLC5A4	1.74484	3.48e-06
XLOC_020629	ENST00000531741.1	VPS26B	1.75879	6.59e-07
XLOC_055288	ENST00000586815.1	WIPI1	1.76508	4.18e-07
XLOC_126664	ENST00000375098.3	TRIM14	1.76513	0.00515316
XLOC_020995	ENST00000527105.1	HPX	1.7662	8.28e-06
XLOC_070982	ENST00000498049.1	C2orf76	1.76968	4.73e-05
XLOC_100140	ENST00000503336.1	SLC26A2	1.76971	7.14e-07
XLOC_074790	ENST00000452907.1	PASK	1.77436	3.3e-05
XLOC_090446	ENST00000497513.1	GNB4	1.77489	3.74e-05
XLOC_102054	ENST00000502907.1	PPAP2A	1.77544	0.000308681
XLOC_092541	ENST00000508453.1	CYP2U1	1.77563	4.74e-07
XLOC_039175	ENST00000555185.1	PRKCH	1.77596	0.00119115
XLOC_119247	ENST00000404321.2	PTPRN2	1.77792	1.5e-06
XLOC_098934	ENST00000513096.1	CARTPT	1.78028	0.00342109
XLOC_018781	ENST00000530244.1	CREB3L1	1.78823	2.59e-05
XLOC_092445	ENST00000453304.1	UNC5C	1.79388	0.000685671
XLOC_037190	ENST00000261531.7	SNW1	1.79574	0.0155364
XLOC_020626	ENST00000533711.1	JAM3	1.79835	9e-05
XLOC_016135	ENST00000474574.1	GLUD1	1.79982	4.54e-07
XLOC_065066	ENST00000449344.2	MERTK	1.80524	5.12e-08
XLOC_058247	ENST00000583046.1	MBD2	1.81075	6.15e-06
XLOC_116329	ENST00000460477.1	IGFBP3	1.81309	0.000514303
XLOC_057562	ENST00000269221.3	C18orf8	1.81563	0.00242947
XLOC_131610	ENST00000379510.3	CNKSR2	1.81595	0.000469466
XLOC_004817	ENST00000376819.3	ANGPTL7	1.82285	0.018426
XLOC_028371	ENST00000539745.1	HIST4H4	1.82498	2.66e-08
XLOC_020101	ENST00000535509.1	ZBTB16	1.82995	9.12e-07
XLOC_032603	ENST00000389797.3	LRCH1	1.83116	3.48e-07
XLOC_075070	ENST00000478522.1	SNRPB2	1.83444	1.73e-05
XLOC_051900	ENST00000413366.3	PRKCA	1.83654	1.96e-08
XLOC_041693	ENST00000563996.1	PIAS1	1.83723	6.01e-08
XLOC_109383	ENST00000374043.2	PACSIN1	1.8384	0.000683481
XLOC_007084	ENST00000491034.1	LPAR3	1.84211	1.95e-07
XLOC_026161	ENST00000548496.1	KRT18	1.84219	5.09e-08
XLOC_105961	ENST00000229922.2	CAP2	1.84397	2.72e-08
XLOC_065011	ENST00000609740.1	CCDC138	1.84417	9.44e-06
XLOC_065697	ENST00000550686.1	DLX1	1.84702	0.00224209
XLOC_041362	ENST00000558574.1	SORD	1.84861	2.19e-05
XLOC_082807	ENST00000492751.1	EDEM1	1.85274	6.93e-08
XLOC_079467	ENST00000517452.1	ADAMTS1	1.85357	7.99e-07
XLOC_020630	ENST00000524502.1	ACAD8	1.85489	9.25e-08
XLOC_010387	ENST00000484000.1	SLC41A1	1.86087	1.47e-07
XLOC_072440	ENST00000466293.2	DLX2	1.86415	0.0184806
XLOC_114979	ENST00000489665.1	AMZ1	1.86535	7.98e-06
XLOC_030796	ENST00000552239.1	TMCC3	1.86643	1.43e-07
XLOC_119505	ENST00000528389.1	MTMR9	1.87012	2.59e-08
XLOC_061888	ENST00000291750.6	ZNF626	1.88875	4.06e-07
XLOC_114832	ENST00000468307.1	INSIG1	1.89025	3.07e-05
XLOC_089021	ENST00000503957.1	EFCAB12	1.89132	5.35e-08
XLOC_013940	ENST00000482091.1	IDI1	1.89229	3.27e-06
XLOC_019919	ENST00000536441.1	SESN3	1.895	0.00669273
XLOC_016490	ENST00000491114.1	RP11-248J23.7	1.89564	0.00467397
XLOC_074766	ENST00000310397.8	SNED1	1.89672	0.00695273
XLOC_080741	ENST00000407550.3	MTFP1	1.89696	4.18e-07
XLOC_012245	ENST00000490549.1	GPR158	1.90038	4.59e-06
XLOC_052901	ENST00000262442.4	DNAH9	1.90065	0.00452732
XLOC_109322	ENST00000475627.1	HLA-DMA	1.90176	2.95e-08
XLOC_077048	ENST00000453095.1	TGM2	1.90403	0.00998759
XLOC_035394	ENST00000538287.1	ABCC4	1.90814	0.000541369
XLOC_051959	ENST00000589316.1	WIPI1	1.90922	0.00946707
XLOC_049922	ENST00000562753.1	CDYL2	1.92384	9.19e-08
XLOC_020479	ENST00000531033.1	TBRG1	1.92863	2.98e-09
XLOC_093310	ENST00000362004.3	LRP2BP	1.93666	6.2e-05
XLOC_114977	ENST00000489665.1	AMZ1	1.94071	3.23e-06
XLOC_010455	ENST00000461135.2	C1orf116	1.95135	3.52e-05
XLOC_123365	ENST00000523531.1	HEY1	1.96131	0.00495572
XLOC_129633	ENST00000375947.1	ZCCHC6	1.96237	4.96e-09
XLOC_024879	ENST00000528876.1	RP11-712L6.5	1.97697	0.00927629
XLOC_091701	ENST00000515847.1	LIMCH1	1.98079	0.000590519
XLOC_048384	ENST00000574787.1	CRYM	1.9924	0.000179229
XLOC_046168	ENST00000300061.2	SCNN1G	1.99547	5.58e-05
XLOC_101856	ENST00000508937.1	SEPP1	2.00516	3.07e-07
XLOC_117455	ENST00000495765.1	AZGP1	2.0052	1.47e-08
XLOC_095806	ENST00000323061.5	NAP1L5	2.00644	1.39e-05
XLOC_099603	ENST00000506812.1	KCNN2	2.01913	1.31e-05
XLOC_003773	ENST00000483688.1	PFKFB2	2.0193	1.06e-08
XLOC_046108	ENST00000564349.1	ERI2	2.02538	0.00108225
XLOC_083544	ENST00000440528.3	RP11-3B7.1	2.03311	0.00128764
XLOC_051962	ENST00000589316.1	WIPI1	2.03828	0.000321716
XLOC_037403	ENST00000261835.3	CYP46A1	2.03969	2.88e-08
XLOC_006330	ENST00000535035.1	DHCR24	2.04054	2.73e-06
XLOC_006240	ENST00000371655.3	RAB3B	2.04104	2.23e-08
XLOC_109384	ENST00000374037.3	SPDEF	2.04633	1.64e-08
XLOC_005186	ENST00000464457.1	RAP1GAP	2.05592	4.5e-07
XLOC_009173	ENST00000458574.1	MPC2	2.05631	7.62e-07
XLOC_065176	ENST00000475783.1	DBI	2.06549	1.93e-05
XLOC_067175	ENST00000443218.1	ODC1	2.06808	5.37e-07
XLOC_019272	ENST00000529677.1	PACS1	2.07245	4.79e-11
XLOC_091072	ENST00000469068.1	FGFR3	2.07608	2.84e-06
XLOC_108390	ENST00000463448.1	TMEM14B	2.08189	0.00137628
XLOC_080803	ENST00000266086.4	SLC5A4	2.08319	8.81e-07
XLOC_059225	ENST00000560628.1	LDLR	2.08326	6.12e-08
XLOC_130392	ENST00000400613.4	C9orf152	2.08636	2.11e-09
XLOC_136282	ENST00000461429.1	TENM1	2.08976	7.72e-11
XLOC_058142	ENST00000588190.1	SMAD7	2.09518	4.9e-09
XLOC_074787	ENST00000310397.8	SNED1	2.09769	4.06e-08
XLOC_051956	ENST00000589316.1	WIPI1	2.10048	1.95e-05
XLOC_009171	ENST00000476818.2	ADCY10	2.10834	1.26e-05
XLOC_105842	ENST00000379568.3	PAK1IP1	2.10839	2.08e-06
XLOC_106482	ENST00000471400.1	ARMC12	2.1176	1.95e-07
XLOC_108102	ENST00000454610.2	PSMG4	2.12356	3.81e-06
XLOC_072340	ENST00000355999.4	STK39	2.12822	5.07e-08
XLOC_085107	ENST00000495891.1	TIPARP	2.13495	7.36e-10
XLOC_104003	ENST00000508067.1	LOX	2.13534	7.81e-06
XLOC_061820	ENST00000593286.1	CRLF1	2.15269	0.0131866
XLOC_121515	ENST00000520004.1	SGK223	2.1531	4.28e-07
XLOC_003364	ENST00000495918.1	LAMC1	2.15986	2.12e-08
XLOC_004818	ENST00000376819.3	ANGPTL7	2.1627	3.27e-08
XLOC_093307	ENST00000362004.3	LRP2BP	2.16477	0.00882604
XLOC_025834	ENST00000381025.3	FGD4	2.16832	4.11e-11
XLOC_044782	ENST00000500334.1	HOMER2	2.17703	1.44e-09
XLOC_111586	ENST00000533224.1	SGK1	2.1826	8.93e-09
XLOC_097164	ENST00000450097.1	MAP9	2.18356	3.81e-11
XLOC_088729	ENST00000480862.1	HGD	2.19093	1.96e-08
XLOC_036306	ENST00000458591.2	SCFD1	2.19862	3.64e-06
XLOC_001842	ENST00000480413.1	CYR61	2.20373	4.93e-11
XLOC_106626	ENST00000372808.3	GNMT	2.206	0.00186129
XLOC_071294	ENST00000360967.5	POTEF	2.20623	3.18e-06
XLOC_092446	ENST00000453304.1	UNC5C	2.21659	4.41e-06
XLOC_098607	ENST00000513635.1	PTGER4	2.24708	3.78e-05
XLOC_066787	ENST00000459928.1	ANO7	2.28647	1.38e-11
XLOC_093001	ENST00000260008.3	FHDC1	2.30258	3e-10
XLOC_080815	ENST00000266086.4	SLC5A4	2.30807	4.58e-10
XLOC_113678	ENST00000490586.1	LAT2	2.31861	1.44e-09
XLOC_096870	ENST00000508084.1	INPP4B	2.32729	2.19e-11
XLOC_051958	ENST00000589316.1	WIPI1	2.33119	0.0322326
XLOC_047128	ENST00000566165.1	CRISPLD2	2.34603	5.38e-12
XLOC_013475	ENST00000280155.2	ADRA2A	2.36539	1.08e-10
XLOC_029420	ENST00000546921.1	KRT8	2.37237	5.44e-12
XLOC_008498	ENST00000479272.1	MTMR11	2.37811	4.13e-13
XLOC_005248	ENST00000486541.1	ID3	2.38207	0.0185862
XLOC_089516	ENST00000474080.1	WWTR1	2.3849	6.06e-09
XLOC_004149	ENST00000493528.1	RHOU	2.39297	8.71e-09
XLOC_085708	ENST00000476918.1	HES1	2.40701	4.2e-05
XLOC_039130	ENST00000325642.3	PPM1A	2.41767	1.69e-05
XLOC_043293	ENST00000399518.3	PLA2G4E	2.43156	1.2e-05
XLOC_123433	ENST00000521773.1	SNX16	2.43287	9.54e-14
XLOC_020102	ENST00000335953.4	ZBTB16	2.43296	6.11e-12
XLOC_126443	ENST00000494726.1	GADD45G	2.44202	4.7e-12
XLOC_118836	ENST00000485416.1	FAM115A	2.44626	3.67e-11
XLOC_080033	ENST00000489201.1	TMPRSS2	2.48832	4.55e-13
XLOC_108392	ENST00000354666.3	ELOVL2	2.49014	3.07e-08
XLOC_131622	ENST00000404933.2	SMS	2.49201	9.57e-10
XLOC_051908	ENST00000375684.1	AC005544.1	2.50209	6.67e-07
XLOC_132745	ENST00000496836.1	PLP1	2.50352	0.000341675
XLOC_060429	ENST00000465141.1	LIN7B	2.51956	2.18e-09
XLOC_066678	ENST00000466594.1	TRPM8	2.52335	2.05e-09
XLOC_079817	ENST00000421802.1	IFNGR2	2.52574	0.000263618
XLOC_127368	ENST00000382500.2	FOXD4	2.54083	2.83e-07
XLOC_072655	ENST00000438871.1	ZNF385B	2.54373	5.37e-09
XLOC_033845	ENST00000483941.1	SMAD9	2.54479	2.06e-13
XLOC_007358	ENST00000480356.1	F3	2.55185	1.37e-08
XLOC_081425	ENST00000331437.3	CECR6	2.55411	7.76e-07
XLOC_086724	ENST00000308059.6	DLEC1	2.5658	0.00303058
XLOC_067062	ENST00000460786.1	MBOAT2	2.59457	7.76e-12
XLOC_057564	ENST00000585908.2	ANKRD29	2.59701	2.88e-15
XLOC_101233	ENST00000504595.1	FBXL7	2.60227	0.0392114
XLOC_021780	ENST00000531481.1	CCDC73	2.60227	0.0392114
XLOC_057118	ENST00000389658.3	LAMA1	2.60506	7.83e-11
XLOC_054014	ENST00000497303.1	TNS4	2.62308	8.57e-09
XLOC_118141	ENST00000447240.1	RNF148	2.6558	7.9e-06
XLOC_089355	ENST00000509842.1	ZBTB38	2.69862	0.0108939
XLOC_008495	ENST00000369145.1	SV2A	2.70649	5.68e-07
XLOC_027100	ENST00000549510.1	SOCS2	2.71076	8.01e-15
XLOC_072221	ENST00000413651.1	DPP4	2.71262	1.46e-07
XLOC_010370	ENST00000367145.3	SLC45A3	2.71417	6.88e-11
XLOC_121893	ENST00000524112.1	CSGALNACT1	2.75782	4.53e-15
XLOC_075291	ENST00000376105.3	ID1	2.76657	0.0173292
XLOC_001118	ENST00000373137.2	RP11-268J15.5	2.78149	1.06e-15
XLOC_042292	ENST00000558751.1	IGF1R	2.78417	4.27e-16
XLOC_004586	ENST00000514502.1	PEX10	2.78645	2.97e-10
XLOC_063252	ENST00000599258.1	ZNF350	2.80017	2.27e-17
XLOC_065341	ENST00000321253.6	TUBA3D	2.82033	1.25e-13
XLOC_042294	ENST00000560277.1	IGF1R	2.82957	4.43e-08
XLOC_055286	ENST00000448504.2	ARSG	2.86269	1.6e-06
XLOC_101773	ENST00000507786.1	LIFR	2.87353	7.46e-21
XLOC_055285	ENST00000448504.2	ARSG	2.87448	1.84e-06
XLOC_095178	ENST00000513315.1	UGT2B11	2.8762	5.7e-19
XLOC_055284	ENST00000448504.2	ARSG	2.88	0.000254719
XLOC_093318	ENST00000506424.1	ANKRD37	2.89721	1.31e-11
XLOC_025156	ENST00000532445.1	NCAPD3	2.90519	1.16e-09
XLOC_072439	ENST00000550686.1	DLX1	2.91526	0.0132188
XLOC_077946	ENST00000472841.1	PMEPA1	2.951	3.18e-15
XLOC_072639	ENST00000498142.1	CCDC141	2.95113	1.71e-20
XLOC_109627	ENST00000415707.1	PGC	2.95794	0.00282912
XLOC_092407	ENST00000512194.1	HERC3	2.97035	4e-12
XLOC_089354	ENST00000509842.1	ZBTB38	2.98481	0.0218599
XLOC_004682	ENST00000487559.1	ERRFI1	3.02442	1.1e-23
XLOC_122103	ENST00000265769.4	ADAM28	3.04151	0.0128775
XLOC_110946	ENST00000230122.3	ZBTB24	3.0538	8.05e-22
XLOC_042028	ENST00000538348.2	C15orf40	3.06645	0.0008324
XLOC_066544	ENST00000495541.1	ACSL3	3.07616	3.96e-16
XLOC_101891	ENST00000511774.1	HMGCS1	3.10648	2.83e-18
XLOC_036134	ENST00000556550.1	DHRS2	3.10726	6.82e-14
XLOC_063750	ENST00000472040.1	GREB1	3.11535	3.04e-20
XLOC_103698	ENST00000333274.6	EFNA5	3.12202	7.52e-22
XLOC_046053	ENST00000205557.7	ABCC6	3.12468	4.94e-11
XLOC_025605	ENST00000546357.1	EMP1	3.15366	5.69e-14
XLOC_068427	ENST00000494083.1	CDC42EP3	3.15531	9.72e-18
XLOC_020104	ENST00000545255.1	NNMT	3.1585	5.54e-18
XLOC_019117	ENST00000533970.1	ASRGL1	3.17315	1.36e-20
XLOC_104393	ENST00000509293.1	SPOCK1	3.22033	4.92e-16
XLOC_027202	ENST00000549608.1	MYBPC1	3.26307	3.03e-10
XLOC_056230	ENST00000592991.1	LDLRAD4	3.31522	3.58e-15
XLOC_115395	ENST00000486219.1	AGR2	3.318	2.64e-22
XLOC_070408	ENST00000483600.1	AFF3	3.32513	4.32e-26
XLOC_122102	ENST00000265769.4	ADAM28	3.33271	0.000230665
XLOC_103384	ENST00000515020.1	ELL2	3.33312	3.43e-19
XLOC_063669	ENST00000472142.1	ID2	3.34542	9.75e-15
XLOC_071301	ENST00000312988.7	TUBA3E	3.3753	1.49e-06
XLOC_102190	ENST00000514809.1	ELOVL7	3.42955	5.52e-27
XLOC_126215	ENST00000377216.3	FAM189A2	3.4575	9.07e-15
XLOC_003994	ENST00000482856.1	DISP1	3.46381	3.44e-30
XLOC_008012	ENST00000465053.1	SPAG17	3.46785	3.84e-15
XLOC_101222	ENST00000504595.1	FBXL7	3.47724	1.99e-09
XLOC_101226	ENST00000504595.1	FBXL7	3.51135	9.86e-09
XLOC_101223	ENST00000504595.1	FBXL7	3.54821	8.79e-13
XLOC_019917	ENST00000536441.1	SESN3	3.58311	4.54e-19
XLOC_069494	ENST00000418066.2	ANXA4	3.60311	4.24e-06
XLOC_032898	ENST00000464404.2	KLF5	3.62477	1.64e-27
XLOC_107716	ENST00000490177.1	AKAP12	3.63609	1.43e-21
XLOC_002743	ENST00000368801.2	HRNR	3.64963	2.54e-05
XLOC_110616	ENST00000369297.1	EPHA7	3.70116	5.95e-27
XLOC_124823	ENST00000523931.1	NDRG1	3.75297	8.52e-32
XLOC_119723	ENST00000520720.1	ADAM7	3.78845	6.55e-16
XLOC_101236	ENST00000504595.1	FBXL7	3.79685	1.07e-12
XLOC_115449	ENST00000242261.5	TWIST1	3.84335	2.14e-30
XLOC_061430	ENST00000585964.1	ZNF812	3.84384	4.67e-16
XLOC_055282	ENST00000582867.1	SLC16A6	3.8609	1.34e-29
XLOC_124820	ENST00000250160.6	WISP1	3.86287	0.000685671
XLOC_101231	ENST00000504595.1	FBXL7	3.86713	6.13e-24
XLOC_013077	ENST00000483064.1	SNCG	3.88081	6.18e-08
XLOC_119717	ENST00000518737.1	ADAM28	3.88614	1.97e-22
XLOC_101219	ENST00000504595.1	FBXL7	3.89088	2.5e-12
XLOC_126859	ENST00000477456.1	ORM1	3.9067	2.65e-08
XLOC_084470	ENST00000469422.1	SLC15A2	3.91114	7.51e-36
XLOC_101225	ENST00000504595.1	FBXL7	3.93488	2.65e-23
XLOC_101238	ENST00000504595.1	FBXL7	3.97887	8.88e-16
XLOC_029080	ENST00000546940.1	SLC38A4	4.03334	8.13e-15
XLOC_109441	ENST00000542713.1	FKBP5	4.03987	5.55e-24
XLOC_121079	ENST00000522691.1	TG	4.04637	1.15e-16
XLOC_054083	ENST00000462611.1	KRT19	4.0539	1.16e-15
XLOC_039938	ENST00000554178.1	PTPN21	4.06341	4.24e-36
XLOC_101220	ENST00000504595.1	FBXL7	4.10918	2.91e-17
XLOC_101234	ENST00000504595.1	FBXL7	4.16399	7.25e-19
XLOC_044436	ENST00000467407.1	CYP11A1	4.16452	3.47e-10
XLOC_074396	ENST00000295440.2	NPPC	4.21818	5.21e-18
XLOC_101217	ENST00000504595.1	FBXL7	4.23292	1.96e-10
XLOC_101218	ENST00000504595.1	FBXL7	4.24877	7.39e-21
XLOC_101237	ENST00000504595.1	FBXL7	4.27965	1.55e-31
XLOC_101232	ENST00000504595.1	FBXL7	4.30957	8.61e-26
XLOC_084467	ENST00000490477.1	EAF2	4.35455	2.66e-31
XLOC_101228	ENST00000504595.1	FBXL7	4.37629	9.78e-22
XLOC_101224	ENST00000504595.1	FBXL7	4.40487	1.99e-18
XLOC_101221	ENST00000504595.1	FBXL7	4.44073	2.45e-32
XLOC_009226	ENST00000546081.1	F5	4.48287	1.49e-33
XLOC_101235	ENST00000504595.1	FBXL7	4.55764	1.02e-17
XLOC_122176	ENST00000520208.1	CHRNA2	4.65513	3.59e-26
XLOC_055283	ENST00000448504.2	ARSG	4.70778	3.46e-13
XLOC_025694	ENST00000544307.1	PDE3A	4.78531	4.8e-39
XLOC_126860	ENST00000412657.1	ORM2	4.80443	1.81e-12
XLOC_055633	ENST00000589992.1	ST6GALNAC1	4.85581	1.83e-34
XLOC_008630	ENST00000368801.2	HRNR	5.01933	4.24e-36
XLOC_008024	ENST00000369429.3	TBX15	5.15899	1.97e-22
XLOC_097505	ENST00000296522.6	HPGD	5.26256	9.8e-34
XLOC_083907	ENST00000405615.2	CADM2	5.28709	2.91e-46
XLOC_122638	ENST00000396822.1	SNAI2	6.15156	2.14e-30
XLOC_117169	ENST00000414498.1	STEAP4	6.44141	4.01e-71
XLOC_028094	ENST00000541671.1	SLC2A3	6.49066	2.4e-68
XLOC_049879	ENST00000393350.1	MAF	7.34859	7.73e-117
XLOC_054817	ENST00000575806.1	TMEM100	7.36973	1.1e-20
