# Supplementary material for: Chromatin Landscape Distinguishes the Genomic Loci of Hundreds of Androgen-Receptor-Associated LincRNAs From the Loci of Non-associated LincRNAs
Source: Front Genet. 2018 Apr 25;9:132. doi: 10.3389/fgene.2018.00132 (PMC5985396; doi:10.3389/fgene.2018.00132)
Supplement: Supplementary file 8 [file Table_8.XLSX]

## Sheet: ARA-lincRNAs
Table S8 - ARA-lincRNAs (this tab) and NonA-lincRNAs (the next tab) in LNCaP cells
Note: The genomic coordinates of lincRNAs annotated as FPKM1_group_nnnnn_transcript_n can be found in Hangauer et. al. 2013, PLoS Genet 9, e1003569.
ARAlincRNA ID	xloc_lincRNA	RIP-Seq log2_(antiAR/IgG)	RIP-Seq pvalue_adjusted	RNA-seq log2_(androgen/vehicle); Cuffdiff2	RNA-seq log2_(androgen/vehicle); DESeq2	RNA-seq pvalue_adjusted; DESeq2	Known lincRNA transcripts in the locus (previously annotated in the public reference transcriptome)	locus genomic coordinates (hg19)	strand	neighbor_Protein-coding_gene(s)	ARA-lincRNA Transcript isoforms in the locus	ARAlincRNA Mean_FPKM_in_vehicle_samples	ARAlincRNA Mean_FPKM_in_Androgen_samples
ARAlincRNA_0001	XLOC_004510	5.36225	0.0879369	0.41214	0.5506	0.434416	-	chr1:856645-859063	-	AL645608.1	TCONS_00014571;TCONS_00014570;TCONS_00014572	2.62621	3.49458
ARAlincRNA_0002	XLOC_000138	5.94377	0.0418959	0.986265	0.482167	0.680954	-	chr1:3695468-3696592	+	SMIM1	TCONS_00000585	0.674144	1.33551
ARAlincRNA_0003	XLOC_000143	4.91943	0.0273191	0.442813	0.304238	0.76791	RP13-15E13.1	chr1:3816935-3834121	+	C1orf174	TCONS_00000606;TCONS_00000607;TCONS_00000610;TCONS_00000608;TCONS_00000609	1.07513	1.46137
ARAlincRNA_0004	XLOC_000145	5.73825	0.0547165	-1.85122	-0.834011	0.699845	linc-AJAP1-5	chr1:4036188-4069751	+	C1orf174	TCONS_00000614;TCONS_00000613	0.327022	0.0906367
ARAlincRNA_0005	XLOC_004750	5.71689	0.0066184	-0.795937	-0.83761	0.0343059	MIR34A,RP3-510D11.1	chr1:9207988-9262678	-	H6PD	TCONS_00015600;TCONS_00015598;TCONS_00015599	4.70594	2.71047
ARAlincRNA_0006	XLOC_004756	6.68817	0.000414988	0.643783	0.00526159	0.998284	linc-GPR157-3	chr1:9474621-9489003	-	SLC25A33	TCONS_00015608;TCONS_00015609;TCONS_00015606;TCONS_00015607	0.355111	0.554832
ARAlincRNA_0007	XLOC_004812	6.48427	0.0198279	1.12568	1.62606	0.193536	-	chr1:11111451-11112137	-	MASP2	TCONS_00015731	0.215902	0.471108
ARAlincRNA_0008	XLOC_004911	6.18123	0.0302226	0.122643	-0.931207	0.331041	-	chr1:14025767-14026552	-	PRDM2	TCONS_00015930	1.49477	1.62739
ARAlincRNA_0009	XLOC_000571	7.79243	0.00194971	0.897113	1.32029	0.0140897	-	chr1:16940083-16942437	+	FPKM1_group_200_transcript_1,FPKM1_group_200_transcript_2,NBPF1	TCONS_00001697	0.693621	1.29175
ARAlincRNA_0010	XLOC_005370	6.78156	0.0121451	-0.259902	-0.267482	0.884058	-	chr1:27020929-27022008	-	ARID1A	TCONS_00017253	0.450389	0.37614
ARAlincRNA_0011	XLOC_000939	5.354	0.0879369	1.1218	0.908174	0.502416	-	chr1:31849734-31850277	+	SERINC2	TCONS_00002889	0.694728	1.51185
ARAlincRNA_0012	XLOC_000971	5.48004	0.0758383	0.183392	-0.489189	0.78554	-	chr1:32707687-32709102	+	TMEM234	TCONS_00003033	0.383104	0.435034
ARAlincRNA_0013	XLOC_005673	6.4217	0.0211389	1.82442	1.12891	0.491314	FPKM1_group_405_transcript_1	chr1:36688148-36688636	-	THRAP3	TCONS_00018196	0.21519	0.762126
ARAlincRNA_0014	XLOC_005674	6.44775	0.0211176	3.93751	3.47114	2.17241e-07	-	chr1:36688988-36689658	-	THRAP3	TCONS_00018197	0.308992	4.73429
ARAlincRNA_0015	XLOC_005926	5.30689	0.0927306	-0.500685	-0.0651645	0.983307	-	chr1:43583494-43583879	-	FAM183A,linc-FAM183A	TCONS_00018904	0.785992	0.555516
ARAlincRNA_0016	XLOC_005968	4.40431	0.0736099	-0.388581	-0.380898	0.799898	FPKM1_group_511_transcript_1	chr1:43820354-43824390	-	CDC20	TCONS_00018964	0.351265	0.268325
ARAlincRNA_0017	XLOC_006197	5.53764	0.0700195	-0.478786	-1.60427	0.013244	linc-FAF1-1	chr1:51441716-51480063	-	CDKN2C	TCONS_00019675;TCONS_00019674	2.00745	1.44051
ARAlincRNA_0018	XLOC_001538	7.87501	0.00142995	-0.546607	-1.22099	0.0119912	linc-DMRTB1-2	chr1:53793904-53812604	+	MAGOH	TCONS_00004985;TCONS_00004984;TCONS_00004986;TCONS_00004983;TCONS_00004982	1.56395	1.07072
ARAlincRNA_0019	XLOC_001604	6.09836	0.0339811	2.20674	1.48938	0.264451	-	chr1:59012780-59013230	+	DAB1,OMA1	TCONS_00005204	0.228011	1.05257
ARAlincRNA_0020	XLOC_006501	4.26194	0.00544116	-0.144144	-0.374158	0.612617	FPKM1_group_694_transcript_1,FPKM1_group_697_transcript_1,FPKM1_group_697_transcript_2,FPKM1_group_698_transcript_2,FPKM1_group_699_transcript_1,FPKM1_group_699_transcript_2,FPKM1_group_700_transcript_1,FPKM1_group_700_transcript_4,RP11-776H12.1,linc-C1orf87-1	chr1:61005012-61106163	-	NFIA	TCONS_00020468;TCONS_00020458;TCONS_00020455;TCONS_00020454;TCONS_00020459;TCONS_00020456;TCONS_00020460;TCONS_00020461;TCONS_00020462;TCONS_00020451;TCONS_00020450;TCONS_00020453;TCONS_00020452;TCONS_00020446;TCONS_00020447;TCONS_00020444;TCONS_00020445	14.5296	13.1481
ARAlincRNA_0021	XLOC_006808	5.88153	0.0460888	-1.25953	-0.603692	0.638645	RP4-660H19.1	chr1:73214603-73364920	-	FPGT,FPGT-TNNI3K,TNNI3K	TCONS_00020995;TCONS_00020987;TCONS_00020984	1.99617	0.83376
ARAlincRNA_0022	XLOC_001769	4.22406	0.0920997	0.300946	0.334196	0.777049	linc-AK5-1	chr1:77685183-77687610	+	PIGK	TCONS_00005911;TCONS_00005910;TCONS_00005913;TCONS_00005912	0.989218	1.21867
ARAlincRNA_0023	XLOC_007037	5.08669	0.0201282	-0.138116	0.343878	0.600697	FPKM1_group_956_transcript_3	chr1:84743003-84763755	-	DNASE2B,RP11-376N17.4,SAMD13	TCONS_00021382;TCONS_00021390;TCONS_00021388;TCONS_00021389;TCONS_00021391	2.99904	2.72524
ARAlincRNA_0024	XLOC_007062	6.69519	0.013893	0.490262	-0.29291	0.902663	FPKM1_group_962_transcript_1,linc-CTBS	chr1:85063634-85086673	-	CTBS,GNG5	TCONS_00021427;TCONS_00021430;TCONS_00021431;TCONS_00021432;TCONS_00021433;TCONS_00021429;TCONS_00021428	0.188656	0.265005
ARAlincRNA_0025	XLOC_007215	4.58614	0.0333742	-0.166537	-0.746113	0.435036	RP5-943J3.2	chr1:89990394-90402903	-	ZNF326	TCONS_00021799	2.99445	2.66799
ARAlincRNA_0026	XLOC_001963	6.06823	0.0361864	-0.87145	-0.493269	0.599737	RP4-561L24.3	chr1:94312729-94314552	+	BCAR3	TCONS_00006527	1.6081	0.87898
ARAlincRNA_0027	XLOC_007362	4.57459	0.0488167	0.203592	0.278242	0.83887	LINC01057,PGBD4P7	chr1:95104016-95285837	-	SLC44A3	TCONS_00022142;TCONS_00022156;TCONS_00022157;TCONS_00022149;TCONS_00022152;TCONS_00022153;TCONS_00022150;TCONS_00022151;TCONS_00022145;TCONS_00022144;TCONS_00022154;TCONS_00022155	0.993004	1.14351
ARAlincRNA_0028	XLOC_002055	4.7081	0.0418092	0.0415218	0.558701	0.536362	FPKM1_group_1089_transcript_2	chr1:100719457-100731676	+	DBT,LRRC39	TCONS_00006782	0.419582	0.431833
ARAlincRNA_0029	XLOC_007975	4.47984	0.0702174	-0.558287	0.0647378	0.979594	FPKM1_group_1309_transcript_1,RP11-27K13.3	chr1:117544381-117602112	-	TTF2,linc-MAN1A2-2	TCONS_00023540;TCONS_00023541;TCONS_00023546;TCONS_00023539	0.256634	0.174282
ARAlincRNA_0030	XLOC_002350	6.01727	0.0394185	0.22742	0.466005	0.702306	linc-FAM72B-3	chr1:120388520-120389383	+	REG4	TCONS_00007835	4.13082	4.83611
ARAlincRNA_0031	XLOC_002434	6.41241	0.0217912	-0.464913	-0.468227	0.423656	FPKM1_group_1393_transcript_2	chr1:142882050-142887263	+	NBPF8	TCONS_00007956	19.11	13.8455
ARAlincRNA_0032	XLOC_008264	6.25394	0.0276323	-1.21145	-1.34703	0.311387	-	chr1:143118703-143467715	-	NBPF8	TCONS_00023987	1.13335	0.489419
ARAlincRNA_0033	XLOC_002593	5.52462	0.0717003	-2.57152	-1.44335	0.0363458	RP11-403I13.4,RP11-403I13.6	chr1:149239335-149265510	+	HIST2H2BB,HIST2H3PS2,RP5-998N21.10	TCONS_00008401;TCONS_00008398;TCONS_00008399;TCONS_00008394;TCONS_00008395;TCONS_00008396;TCONS_00008397;TCONS_00008400;TCONS_00008391;TCONS_00008392;TCONS_00008393	0.911501	0.153339
ARAlincRNA_0034	XLOC_002613	4.11059	0.0258763	-1.32596	-1.4211	0.00373266	RP11-277L2.4,RP11-353N4.6,RP11-353N4.7,RP11-353N4.8,linc-FCGR1A-2	chr1:149575344-149637707	+	AL358813.2,RP11-353N4.4	TCONS_00008449;TCONS_00008427;TCONS_00008456;TCONS_00008440;TCONS_00008441;TCONS_00008428;TCONS_00008429;TCONS_00008444;TCONS_00008445;TCONS_00008446;TCONS_00008447;TCONS_00008454;TCONS_00008453;TCONS_00008443;TCONS_00008452;TCONS_00008451;TCONS_00008455;TCONS_00008450;TCONS_00008442;TCONS_00008431;TCONS_00008430;TCONS_00008433;TCONS_00008432;TCONS_00008435;TCONS_00008434;TCONS_00008437;TCONS_000…	7.0686	2.81956
ARAlincRNA_0035	XLOC_008524	5.59377	0.0662307	-0.0396216	-0.641127	0.708645	-	chr1:150038694-150039082	-	PLEKHO1,VPS45,linc-CA14	TCONS_00024679	1.30594	1.27056
ARAlincRNA_0036	XLOC_002661	5.37871	0.0120583	-0.28794	-0.722856	0.554845	linc-ADAMTSL4	chr1:150491136-150509813	+	ADAMTSL4,MIR4257	TCONS_00008614;TCONS_00008617;TCONS_00008618	0.408289	0.334418
ARAlincRNA_0037	XLOC_008717	6.43197	0.0208213	2.03936	1.67684	0.0279065	FPKM1_group_1506_transcript_1	chr1:154637653-154650380	-	ADAR	TCONS_00025429;TCONS_00025430	3.08008	12.661
ARAlincRNA_0038	XLOC_003021	5.74402	0.0542593	0.0214628	-0.448366	0.737692	-	chr1:161369771-161370514	+	C1orf192	TCONS_00010174	1.41251	1.43369
ARAlincRNA_0039	XLOC_003122	5.38662	0.0831001	-2.99168	-2.6962	3.19391e-05	-	chr1:167138324-167139808	+	POU2F1	TCONS_00010544	1.35536	0.1704
ARAlincRNA_0040	XLOC_009150	6.09673	0.0341342	-3.81415	-2.45071	0.0318271	FPKM1_group_1621_transcript_2	chr1:167140208-167141126	-	POU2F1	TCONS_00026943	0.473496	0.0336623
ARAlincRNA_0041	XLOC_003123	7.39382	0.00382058	-3.07356	-2.37599	0.00519183	-	chr1:167141472-167142460	+	POU2F1	TCONS_00010545	0.851642	0.101163
ARAlincRNA_0042	XLOC_009224	6.52175	0.0181773	-0.101065	-0.376612	0.810455	FPKM1_group_1651_transcript_2	chr1:169457385-169458299	-	SLC19A2	TCONS_00027104	0.685119	0.638766
ARAlincRNA_0043	XLOC_009565	6.24873	0.0290022	-1.59887	0.963429	0.305205	RP11-533E19.7	chr1:179850741-179894135	-	CEP350	TCONS_00027744;TCONS_00027745	0.630263	0.208072
ARAlincRNA_0044	XLOC_010071	5.39832	0.0836696	-0.977634	-2.26645	0.0593848	-	chr1:197870958-197871580	-	C1orf53	TCONS_00028538	0.808548	0.41059
ARAlincRNA_0045	XLOC_010185	4.20268	0.0884123	-0.495676	-0.390836	0.696603	FPKM1_group_2080_transcript_1	chr1:201083080-201096312	-	TMEM9	TCONS_00028710	2.05005	1.45395
ARAlincRNA_0046	XLOC_003776	4.79847	0.034325	-1.7753	-1.82405	0.000118275	C4BPAP1,RP11-164O23.7	chr1:207326645-207357870	+	YOD1	TCONS_00012502;TCONS_00012503;TCONS_00012500;TCONS_00012501;TCONS_00012499;TCONS_00012490;TCONS_00012491;TCONS_00012492	1.77461	0.518422
ARAlincRNA_0047	XLOC_003832	6.32297	0.0244459	-1.03071	-1.46005	0.0782328	-	chr1:211753056-211754161	+	SLC30A1	TCONS_00012747	0.825576	0.404095
ARAlincRNA_0048	XLOC_010975	3.70348	0.0271641	-0.297115	-0.250595	0.733612	RP11-504P24.8	chr1:224138975-224141403	-	AC138393.1	TCONS_00030424;TCONS_00030423	12.8723	10.4765
ARAlincRNA_0049	XLOC_010979	6.86119	0.0102932	-0.155159	-0.478472	0.753118	FPKM1_group_2406_transcript_1	chr1:224148818-224150032	-	AC138393.1	TCONS_00030429;TCONS_00030428	3.61272	3.24434
ARAlincRNA_0050	XLOC_010980	5.6895	0.0582334	-0.429073	-0.499627	0.400387	linc-TP53BP2-1	chr1:224151248-224161773	-	AC138393.1	TCONS_00030432;TCONS_00030433;TCONS_00030430;TCONS_00030431	10.8185	8.03532
ARAlincRNA_0051	XLOC_004024	6.14267	0.032698	-0.455464	-0.240795	0.877677	-	chr1:224388868-224389773	+	DEGS1	TCONS_00013270	1.12169	0.818023
ARAlincRNA_0052	XLOC_011062	4.62949	0.0475756	-1.1933	-0.710763	0.596203	-	chr1:226307481-226308995	-	H3F3A	TCONS_00030639	0.623231	0.272541
ARAlincRNA_0053	XLOC_004099	5.92377	0.0431217	0.135885	-0.173727	0.874277	FPKM1_group_2453_transcript_1	chr1:227969695-227971304	+	JMJD4	TCONS_00013496	5.25797	5.77728
ARAlincRNA_0054	XLOC_011515	4.55345	0.0165871	-3.90313	-1.82271	0.0969604	RP5-855F14.1	chr1:234663636-234667525	-	TARBP1	TCONS_00031431;TCONS_00031430;TCONS_00031429	0.365553	0.0244337
ARAlincRNA_0055	XLOC_011734	3.93604	0.0348898	-0.440946	-0.408616	0.564624	RP11-261C10.3	chr1:243242158-243265035	-	CEP170	TCONS_00031839;TCONS_00031838;TCONS_00031840;TCONS_00031841;TCONS_00031843;TCONS_00031844;TCONS_00031845;TCONS_00031846;TCONS_00031847;TCONS_00031848	17.9997	13.2595
ARAlincRNA_0056	XLOC_011897	5.23009	0.0979156	-1.39285	-1.45169	0.304711	-	chr1:249130802-249131409	-	ZNF672	TCONS_00032206	0.586514	0.223351
ARAlincRNA_0057	XLOC_011899	4.56447	0.053569	0.795172	0.668574	0.681211	FPKM1_group_2743_transcript_1	chr1:249166966-249168821	-	ZNF692	TCONS_00032254	0.176303	0.305937
ARAlincRNA_0058	XLOC_013929	5.92322	0.0431855	0.444466	0.721469	0.466202	-	chr10:849617-850879	-	PRR26	TCONS_00037917	0.764635	1.04052
ARAlincRNA_0059	XLOC_013966	6.53835	0.0180559	-2.00215	-2.47862	0.0508349	-	chr10:2343489-2344164	-	PFKP	TCONS_00037996	0.557015	0.139047
ARAlincRNA_0060	XLOC_013974	6.22696	0.0292305	2.15417	0.757015	0.657918	-	chr10:3027171-3027541	-	PFKP	TCONS_00038023	0.71152	3.16706
ARAlincRNA_0061	XLOC_014331	3.97135	0.0535312	-0.820119	-0.387009	0.741299	FPKM1_group_2941_transcript_1	chr10:14917704-14919511	-	SUV39H2	TCONS_00038775	0.985604	0.558242
ARAlincRNA_0062	XLOC_012341	6.38498	0.0229765	-0.631609	-0.942912	0.180543	-	chr10:32218340-32219867	+	ARHGAP12	TCONS_00033563	1.59518	1.02962
ARAlincRNA_0063	XLOC_012358	5.30074	0.0945434	-0.019218	-0.136202	0.906273	-	chr10:33625806-33627240	+	NRP1	TCONS_00033605	2.91499	2.87642
ARAlincRNA_0064	XLOC_012370	7.53273	0.00310569	-0.536105	-1.03468	0.236093	-	chr10:35262923-35264885	+	CUL2	TCONS_00033618;TCONS_00033617	0.738058	0.508987
ARAlincRNA_0065	XLOC_015040	3.60856	0.0540741	2.38238	2.52636	5.62701e-06	AL022344.4,FPKM1_group_3239_transcript_1,FPKM1_group_3240_transcript_1	chr10:43166881-43187191	-	ZNF33B	TCONS_00040116;TCONS_00040117;TCONS_00040118;TCONS_00040119	0.162547	0.847509
ARAlincRNA_0066	XLOC_015541	4.30584	0.0778514	-1.53936	-0.835436	0.609018	FPKM1_group_3391_transcript_1	chr10:65424423-65750346	-	JMJD1C	TCONS_00041245	0.256215	0.0881476
ARAlincRNA_0067	XLOC_015649	5.79901	0.0507781	-0.71604	-0.364359	0.870221	-	chr10:70660177-70660530	-	DDX50	TCONS_00041469	1.46875	0.894125
ARAlincRNA_0068	XLOC_015651	5.23428	0.0981076	-1.34829	-0.629514	0.749336	-	chr10:70715300-70715756	-	DDX21	TCONS_00041471	0.511684	0.200968
ARAlincRNA_0069	XLOC_015781	5.23857	0.0990248	-0.792989	-1.49227	0.128378	-	chr10:74032054-74032672	-	DDIT4	TCONS_00041725	1.54111	0.889449
ARAlincRNA_0070	XLOC_015860	6.01329	0.0382888	0.35671	0.00392567	0.998577	RP11-178G16.4	chr10:75757827-75910821	-	ADK,MRPL35P3	TCONS_00042000	1.08813	1.39335
ARAlincRNA_0071	XLOC_016139	3.50817	0.0820538	0.522478	0.717874	0.406981	FPKM1_group_3625_transcript_2	chr10:88963631-89102369	-	FPKM1_group_3631_transcript_2,LINC00863,NUTM2D	TCONS_00042532	0.625558	0.898564
ARAlincRNA_0072	XLOC_016140	6.00571	0.0391527	0.111794	-0.167601	0.942433	FPKM1_group_3625_transcript_1	chr10:88963631-89102369	-	FPKM1_group_3631_transcript_2,LINC00863,NUTM2D	TCONS_00042533	4.04855	4.37475
ARAlincRNA_0073	XLOC_016298	3.9716	0.0288263	-0.288566	-1.04743	0.0301934	RP11-80H5.9,linc-PANK1-2	chr10:91426937-91460889	-	KIF20B	TCONS_00042792;TCONS_00042791;TCONS_00042780;TCONS_00042788;TCONS_00042787;TCONS_00042786;TCONS_00042781;TCONS_00042779;TCONS_00042790;TCONS_00042782	3.09503	2.53395
ARAlincRNA_0074	XLOC_013268	6.74836	0.0126423	0.243514	0.56113	0.395393	-	chr10:98749928-98752019	+	C10orf12,LCOR	TCONS_00036052	2.41361	2.8574
ARAlincRNA_0075	XLOC_016660	4.91967	0.0274134	0.462688	0.510218	0.588728	RP11-108L7.15,linc-PDZD7	chr10:102819375-102820762	-	KAZALD1	TCONS_00043588;TCONS_00043589	1.36424	1.88006
ARAlincRNA_0076	XLOC_013358	5.15754	0.0197193	-0.373033	-0.427197	0.665938	-	chr10:103880544-103883384	+	LDB1	TCONS_00036370;TCONS_00036369	1.75848	1.35783
ARAlincRNA_0077	XLOC_013391	6.78713	0.0119732	0.0172039	-0.355519	0.780888	-	chr10:104953240-104954446	+	NT5C2	TCONS_00036517	1.39658	1.41334
ARAlincRNA_0078	XLOC_017084	6.01413	0.038014	-0.896296	-2.55915	0.0395408	-	chr10:115938033-115938635	-	C10orf118,MIR2110	TCONS_00044384	0.854002	0.458825
ARAlincRNA_0079	XLOC_017256	4.13113	0.0977186	0.224762	0.365252	0.841647	FPKM1_group_4004_transcript_1	chr10:121357639-121359094	-	TIAL1	TCONS_00044728	0.214039	0.250123
ARAlincRNA_0080	XLOC_017473	3.19182	0.0925227	-0.0786018	-0.304182	0.743102	linc-C10orf90-2	chr10:128588132-128593701	-	DOCK1	TCONS_00045207;TCONS_00045208	2.86512	2.7132
ARAlincRNA_0081	XLOC_013799	5.9929	0.0394185	-0.068695	-0.672493	0.575794	-	chr10:133799262-133800380	+	BNIP3	TCONS_00037637	0.999742	0.953254
ARAlincRNA_0082	XLOC_013800	7.43524	0.00349748	0.295244	0.258314	0.874271	-	chr10:133800462-133801078	+	BNIP3	TCONS_00037638	1.69032	2.07418
ARAlincRNA_0083	XLOC_017550	6.38426	0.0227527	-0.180979	-1.53113	0.194895	FPKM1_group_4138_transcript_1	chr10:133878215-133878842	-	DPYSL4,JAKMIP3	TCONS_00045327	1.56099	1.37695
ARAlincRNA_0084	XLOC_017565	5.24615	0.0966338	1.18175	0.726761	0.732059	-	chr10:134273227-134273775	-	C10orf91	TCONS_00045354	0.265371	0.602
ARAlincRNA_0085	XLOC_017569	4.38391	0.0682226	-0.837395	-1.1122	0.328684	-	chr10:134338476-134339229	-	INPP5A	TCONS_00045358	1.21603	0.680554
ARAlincRNA_0086	XLOC_020642	6.5524	0.0171749	0.36867	0.0680818	0.94934	LINC01001	chr11:127114-207428	-	RIC8A	TCONS_00055578;TCONS_00055579;TCONS_00055581;TCONS_00055580;TCONS_00055573;TCONS_00055576;TCONS_00055577;TCONS_00055574;TCONS_00055575	6.38743	8.24721
ARAlincRNA_0087	XLOC_020707	5.49879	0.0734797	2.16617	1.81723	0.0771065	-	chr11:1286215-1286917	-	AC136297.1	TCONS_00055975	0.154575	0.69378
ARAlincRNA_0088	XLOC_017737	5.6394	0.0658408	-0.640535	-0.729311	0.630394	-	chr11:3086558-3087332	+	CARS	TCONS_00046155	0.815017	0.522813
ARAlincRNA_0089	XLOC_021181	5.3212	0.0913053	0.0380209	-0.373884	0.848235	RP11-540A21.2,linc-TMEM41B	chr11:9776103-10315754	-	MTRNR2L8	TCONS_00057279;TCONS_00057278;TCONS_00057282;TCONS_00057280;TCONS_00057281	0.16485	0.169252
ARAlincRNA_0090	XLOC_021472	7.63518	0.00231862	-0.165556	0.348433	0.605517	FPKM1_group_4339_transcript_1	chr11:23124799-23181427	-	SVIP	TCONS_00058157;TCONS_00058158	7.58017	6.75836
ARAlincRNA_0091	XLOC_018200	3.24692	0.0850775	-0.0439755	0.157551	0.885302	-	chr11:23226762-23229443	+	SVIP	TCONS_00047529	1.08697	1.05434
ARAlincRNA_0092	XLOC_018207	5.92387	0.0431217	0.260485	-1.75777	0.275894	-	chr11:23238049-23238511	+	SVIP	TCONS_00047536	0.241853	0.289712
ARAlincRNA_0093	XLOC_021561	6.25342	0.0271641	-2.06041	-2.87762	0.000259105	-	chr11:24514890-24516099	-	LUZP2	TCONS_00058277	0.771902	0.185062
ARAlincRNA_0094	XLOC_021562	5.33137	0.0936574	-2.04923	-2.40299	0.0222054	-	chr11:24516481-24517092	-	LUZP2	TCONS_00058278	1.02226	0.24699
ARAlincRNA_0095	XLOC_021564	6.10705	0.0339561	-1.16396	-2.57964	0.000198549	-	chr11:24518053-24518433	-	LUZP2	TCONS_00058280	4.60525	2.05526
ARAlincRNA_0096	XLOC_021978	5.45142	0.0779604	-0.483415	-0.0137091	0.991835	-	chr11:38222267-38358630	-	C11orf74	TCONS_00059037	3.0823	2.20471
ARAlincRNA_0097	XLOC_022203	5.22114	0.0989855	-0.361928	-0.106962	0.970212	CTD-2589M5.4,FPKM1_group_4614_transcript_3,linc-PHF21A-2	chr11:46277835-46296098	-	CREB3L1	TCONS_00059402;TCONS_00059403;TCONS_00059404	0.939688	0.731194
ARAlincRNA_0098	XLOC_022266	6.00906	0.0418092	0.273093	0.136111	0.910746	-	chr11:47626616-47630236	-	KBTBD4	TCONS_00059680	0.548045	0.662255
ARAlincRNA_0099	XLOC_022505	6.02954	0.00267712	0.913965	0.908934	0.146918	TU_0091997_0	chr11:58601541-58844731	-	FAM111B	TCONS_00060181	0.519488	0.978828
ARAlincRNA_0100	XLOC_022522	3.95012	0.0709771	0.472982	0.260873	0.778054	FPKM1_group_4670_transcript_2	chr11:58863722-58866347	-	FAM111B	TCONS_00060199	0.914126	1.26878
ARAlincRNA_0101	XLOC_019175	6.24873	0.0290022	-0.380138	-0.405422	0.779347	-	chr11:63943075-63943523	+	FLRT1	TCONS_00050167	0.365263	0.280655
ARAlincRNA_0102	XLOC_022811	5.88153	0.0460888	0.00852791	-0.167187	0.894035	RP11-869B15.1	chr11:64552392-64553092	-	SF1	TCONS_00061344	2.92258	2.93991
ARAlincRNA_0103	XLOC_022812	5.00045	0.0236409	-0.0730084	0.259828	0.832787	FPKM1_group_4760_transcript_1	chr11:64553168-64554573	-	SF1	TCONS_00061345	0.880141	0.836709
ARAlincRNA_0104	XLOC_022896	6.41585	0.00142995	-0.410674	-0.967666	0.49143	-	chr11:65552904-65554020	-	OVOL1	TCONS_00061743	0.849787	0.639271
ARAlincRNA_0105	XLOC_022900	5.46955	0.0757944	-0.992825	-1.29908	0.00491506	linc-DKFZp761E198	chr11:65574314-65585604	-	SNX32	TCONS_00061752;TCONS_00061751;TCONS_00061750;TCONS_00061749	3.33045	1.67353
ARAlincRNA_0106	XLOC_022951	7.14335	0.00622926	0.562603	0.696775	0.197476	-	chr11:66449927-66450665	-	RBM4B	TCONS_00061992	11.6188	17.1601
ARAlincRNA_0107	XLOC_019312	3.8406	0.0300571	0.965896	0.991752	0.250798	FPKM1_group_4803_transcript_1	chr11:66840751-66842325	+	RHOD	TCONS_00051139	0.465942	0.910113
ARAlincRNA_0108	XLOC_023008	5.28359	0.0938102	-0.87402	-0.744317	0.233037	RP11-655M14.13	chr11:67384317-67395159	-	NUDT8	TCONS_00062190;TCONS_00062191	1.86035	1.01505
ARAlincRNA_0109	XLOC_023130	6.32486	0.0249027	0.273726	0.0513057	0.981799	linc-MRGPRF-4	chr11:68996232-69002418	-	TPCN2	TCONS_00062448;TCONS_00062449;TCONS_00062447	0.189619	0.229235
ARAlincRNA_0110	XLOC_019454	7.55553	0.00276678	-0.198554	-0.315795	0.835764	linc-NADSYN1-2	chr11:70996104-70998121	+	SHANK2	TCONS_00051732	0.916215	0.798412
ARAlincRNA_0111	XLOC_019674	3.42983	0.032698	-0.124004	-0.553327	0.435113	FPKM1_group_4981_transcript_2,FPKM1_group_4981_transcript_3,KCTD21-AS1,linc-USP35	chr11:77850805-77925757	+	ALG8	TCONS_00052553;TCONS_00052550;TCONS_00052548;TCONS_00052549;TCONS_00052546;TCONS_00052547;TCONS_00052544;TCONS_00052545;TCONS_00052542;TCONS_00052543;TCONS_00052540;TCONS_00052541;TCONS_00052555;TCONS_00052562;TCONS_00052551;TCONS_00052554;TCONS_00052552;TCONS_00052557;TCONS_00052561;TCONS_00052556	10.1757	9.33758
ARAlincRNA_0112	XLOC_023761	5.2455	0.0962323	-0.812918	-0.450817	0.553841	-	chr11:89927483-89931781	-	CHORDC1	TCONS_00064115	0.976155	0.555656
ARAlincRNA_0113	XLOC_023902	6.26712	0.0266864	0.16685	0.235492	0.847711	-	chr11:94148661-94149808	-	ANKRD49	TCONS_00064382	1.34923	1.51466
ARAlincRNA_0114	XLOC_024481	5.40881	0.082304	1.00111	0.528202	0.669933	AP006216.11	chr11:116645825-116646592	-	BUD13	TCONS_00065687	0.346868	0.694268
ARAlincRNA_0115	XLOC_020486	5.28046	0.0927306	-1.61086	-0.616287	0.745259	FPKM1_group_5555_transcript_3	chr11:124636393-124704383	+	NRGN	TCONS_00054959	1.14862	0.376061
ARAlincRNA_0116	XLOC_024755	6.02814	0.0373266	-0.278879	-0.224186	0.927824	FPKM1_group_5555_transcript_2	chr11:124636393-124704383	-	ROBO3	TCONS_00066533	1.59776	1.31692
ARAlincRNA_0117	XLOC_024757	3.7929	0.0891183	-0.866146	0.38509	0.843039	FPKM1_group_5555_transcript_3,FPKM1_group_5555_transcript_4	chr11:124636393-124704383	-	ROBO3	TCONS_00066535;TCONS_00066536	2.56947	1.40964
ARAlincRNA_0118	XLOC_024764	5.97501	0.043488	-0.12448	-0.395272	0.83217	-	chr11:124820413-124821419	-	CCDC15	TCONS_00066556	4.73618	4.34466
ARAlincRNA_0119	XLOC_024766	6.68713	0.0147851	-1.12127	-1.15777	0.3869	-	chr11:124823375-124823919	-	CCDC15	TCONS_00066558	1.46412	0.673043
ARAlincRNA_0120	XLOC_025099	7.28854	0.00471223	0.664314	0.644207	0.788898	FPKM1_group_5591_transcript_1	chr11:129936835-130014708	-	ST14	TCONS_00067144;TCONS_00067145	0.0777935	0.123288
ARAlincRNA_0121	XLOC_025123	4.64022	0.0242188	0.664301	0.376547	0.570277	RP11-890B15.3	chr11:130736148-130740142	-	SNX19	TCONS_00067197	3.20054	5.07221
ARAlincRNA_0122	XLOC_020621	5.5646	0.0677857	-1.65998	-3.49874	0.00339154	-	chr11:133827894-133828793	+	AP000911.1,IGSF9B	TCONS_00055462	0.62112	0.196549
ARAlincRNA_0123	XLOC_027828	4.25718	0.0819673	-1.7228	-0.531519	0.802114	-	chr12:2048513-2049453	-	ADIPOR2	TCONS_00076971	0.274054	0.0830275
ARAlincRNA_0124	XLOC_027862	4.76132	0.0156448	0.143852	-0.37537	0.730089	FPKM1_group_5636_transcript_2	chr12:3066082-3067465	-	TEAD4	TCONS_00077041	1.39881	1.54548
ARAlincRNA_0125	XLOC_025231	5.34345	0.0938102	-0.896468	-0.602014	0.766198	-	chr12:3423829-3424320	+	TSPAN9	TCONS_00067649	0.517	0.277733
ARAlincRNA_0126	XLOC_025248	5.28046	0.0927306	-0.0243884	0.0853854	0.96272	-	chr12:4467528-4469159	+	C12orf5	TCONS_00067689	0.579306	0.569595
ARAlincRNA_0127	XLOC_025260	7.45556	0.00351851	-0.152031	-0.100278	0.930291	FPKM1_group_5679_transcript_1	chr12:5231528-5282774	+	AKAP3	TCONS_00067787;TCONS_00067771;TCONS_00067772	5.92598	5.33328
ARAlincRNA_0128	XLOC_025367	4.5526	0.0526785	-1.02516	-0.99996	0.0340778	RP11-1038A11.1	chr12:5495017-5515930	+	AKAP3	TCONS_00067890;TCONS_00067889;TCONS_00067888;TCONS_00067887;TCONS_00067886	3.13435	1.54008
ARAlincRNA_0129	XLOC_028063	4.64341	0.0212376	-0.633681	-1.73881	0.00502145	-	chr12:7070501-7071942	-	C1S,EMG1,U47924.27	TCONS_00077584;TCONS_00077583	3.133	2.01931
ARAlincRNA_0130	XLOC_028100	4.50809	0.0569566	-1.87754	-1.354	0.222275	-	chr12:8233984-8234726	-	NECAP1	TCONS_00077788	0.82362	0.224146
ARAlincRNA_0131	XLOC_028396	5.80145	0.0517332	1.58552	0.164068	0.95763	FPKM1_group_5828_transcript_3	chr12:16500075-16763528	-	LMO3	TCONS_00078603	0.255887	0.767961
ARAlincRNA_0132	XLOC_029377	4.21685	0.0859261	6.06299	5.35728	1.37102e-40	RP1-288H2.2,linc-FIGNL2-2	chr12:52463029-52512168	-	C12orf44	TCONS_00081238;TCONS_00081239	0.450468	30.1166
ARAlincRNA_0133	XLOC_026185	5.46734	0.0757283	1.11763	1.09038		FPKM1_group_6249_transcript_1,linc-HOXC13-2	chr12:54104902-54125008	+	CALCOCO1	TCONS_00071263;TCONS_00071264;TCONS_00071265;TCONS_00071266;TCONS_00071267	0.0753682	0.163541
ARAlincRNA_0134	XLOC_029552	5.41649	0.0825029	0.539484	-0.0195045	0.995446	FPKM1_group_6285_transcript_1	chr12:56295196-56347811	-	CDK2	TCONS_00082005	0.440724	0.640572
ARAlincRNA_0135	XLOC_029810	5.60967	0.00673464	0.543194	0.861503	0.417042	-	chr12:65173520-65174231	-	TBC1D30	TCONS_00083023	0.991386	1.44464
ARAlincRNA_0136	XLOC_029982	4.5019	0.0558597	-1.94083	-1.15109	0.521844	RP11-637A17.2	chr12:69068150-69136785	-	AC124890.1,SLC35E3,linc-MDM2	TCONS_00083335;TCONS_00083334;TCONS_00083333;TCONS_00083338	0.167496	0.043627
ARAlincRNA_0137	XLOC_026916	6.50403	0.0200237	-0.594111	-0.0304543	0.991897	-	chr12:86067807-86068675	+	C12orf29	TCONS_00073616	0.423829	0.280767
ARAlincRNA_0138	XLOC_030447	6.77185	0.0120484	-1.29555	-1.6468	0.0889349	FPKM1_group_6729_transcript_1	chr12:86099227-86102721	-	C12orf29	TCONS_00084217	1.29531	0.527685
ARAlincRNA_0139	XLOC_030469	5.95715	0.00314417	0.352802	-0.377093	0.659576	FPKM1_group_6741_transcript_2,MKRN9P	chr12:88175757-88178345	-	C12orf29	TCONS_00084259;TCONS_00084258;TCONS_00084257	3.33396	4.25759
ARAlincRNA_0140	XLOC_026971	5.41241	0.0841925	-0.391308	-1.09224	0.419997	RP11-567C2.1,linc-CLLU1-6	chr12:90494476-90506556	+	ATP2B1	TCONS_00073701;TCONS_00073700;TCONS_00073702;TCONS_00073699	1.10408	0.841791
ARAlincRNA_0141	XLOC_027096	5.27332	0.0958522	-2.76818	-1.5968	0.346048	-	chr12:93836746-93837173	+	UBE2N	TCONS_00073873	0.590783	0.0867206
ARAlincRNA_0142	XLOC_027123	5.33252	0.00514545	-0.714998	-1.79361	0.00993138	-	chr12:94853901-94855287	+	CCDC41	TCONS_00073962	1.60296	0.976532
ARAlincRNA_0143	XLOC_031071	7.17587	0.00592682	0.458214	0.0640604	0.980506	linc-ARL1-2	chr12:102089779-102137918	-	GNPTAB	TCONS_00085449	0.205897	0.28287
ARAlincRNA_0144	XLOC_031328	5.2455	0.0962323	0.247802	-0.839435	0.672372	-	chr12:110436347-110436876	-	ANKRD13A	TCONS_00086169	0.749313	0.889731
ARAlincRNA_0145	XLOC_031357	4.51141	0.0545113	-0.519021	-0.743742	0.572336	FPKM1_group_7118_transcript_3	chr12:110717199-110717759	-	ATP2A2	TCONS_00086210	1.57984	1.10248
ARAlincRNA_0146	XLOC_031654	4.34273	0.0777329	0.285143	0.726113	0.519894	RP11-103B5.2	chr12:117537285-117580896	-	TESC	TCONS_00086903	0.767971	0.935796
ARAlincRNA_0147	XLOC_031666	7.24747	0.00589952	3.09503	2.55723	0.0152014	RP11-131L12.2	chr12:118813154-118814080	-	SUDS3	TCONS_00087012	0.0747401	0.638632
ARAlincRNA_0148	XLOC_031808	5.78539	0.0522989	0.152691	0.0231175	0.993945	-	chr12:123894794-123895653	-	RILPL2	TCONS_00087693	0.402077	0.446965
ARAlincRNA_0149	XLOC_031846	5.11443	0.0244607	-0.252898	-0.0713334	0.961325	RP11-83B20.1	chr12:124808928-125052135	-	CCDC92	TCONS_00087795	1.79752	1.5085
ARAlincRNA_0150	XLOC_027672	4.11587	0.0649536	0.250453	0.412823	0.712403	-	chr12:127399765-127637627	+	AACS	TCONS_00076344	0.617059	0.734041
ARAlincRNA_0151	XLOC_027667	5.087	0.0233465	0.157288	0.0549343	0.964779	linc-TMEM132C-6,linc-TMEM132C-7	chr12:127399765-127637627	+	AACS	TCONS_00076339;TCONS_00076338;TCONS_00076337;TCONS_00076350	6.04172	6.73766
ARAlincRNA_0152	XLOC_031935	3.84274	0.0903168	0.00327104	-0.303722	0.840639	FPKM1_group_7363_transcript_1,RP11-575F12.1	chr12:127399765-127637627	-	SLC15A4	TCONS_00087999;TCONS_00087998;TCONS_00087997;TCONS_00088001;TCONS_00088003;TCONS_00088004	0.776785	0.778549
ARAlincRNA_0153	XLOC_032005	5.35255	0.0861463	-0.374935	-0.529498	0.478497	RP11-76C10.5	chr12:131438451-131626014	-	RAN	TCONS_00088154;TCONS_00088155;TCONS_00088152;TCONS_00088153	2.12817	1.64112
ARAlincRNA_0154	XLOC_033355	5.67774	0.00823972	0.294678	0.50455	0.353153	FPKM1_group_7443_transcript_1,GTF2IP3,PHF2P2,RNA5SP24	chr13:19520894-19692446	-	MPHOSPH8	TCONS_00091370;TCONS_00091371;TCONS_00091388;TCONS_00091387;TCONS_00091386;TCONS_00091389;TCONS_00091383;TCONS_00091385;TCONS_00091384;TCONS_00091369;TCONS_00091368;TCONS_00091367;TCONS_00091366;TCONS_00091395	12.1054	14.8487
ARAlincRNA_0155	XLOC_032318	6.26985	0.0267013	-0.673963	-2.14516	0.036804	FPKM1_group_7579_transcript_1	chr13:30221770-30229714	+	SLC7A1	TCONS_00088859;TCONS_00088858	0.596421	0.373827
ARAlincRNA_0156	XLOC_034149	5.81646	0.0495901	2.22826	1.24111	0.244977	FPKM1_group_7778_transcript_2	chr13:44884874-44890806	-	SMIM2	TCONS_00092818	0.140414	0.657937
ARAlincRNA_0157	XLOC_034825	4.33588	0.0713567	0.318351	0.441473	0.603018	-	chr13:68062734-68063760	-	KLHL1	TCONS_00093981	2.67575	3.33641
ARAlincRNA_0158	XLOC_035427	6.32981	0.0253552	0.399563	0.391908	0.772798	-	chr13:98083596-98084849	-	RAP2A	TCONS_00094858	0.49401	0.651652
ARAlincRNA_0159	XLOC_033099	5.62442	0.006621	-1.08529	-0.826651	0.526809	STK24-AS1,linc-UBAC2-2	chr13:99102454-99231177	+	STK24	TCONS_00090663;TCONS_00090665;TCONS_00090664;TCONS_00090666	0.642281	0.302706
ARAlincRNA_0160	XLOC_035590	6.21658	0.0286496	0.606362	1.18746	0.285996	FPKM1_group_8395_transcript_5	chr13:107223568-107230972	-	ARGLU1	TCONS_00095155	0.27886	0.424541
ARAlincRNA_0161	XLOC_033249	6.55529	0.017839	-0.960011	-1.19196	0.0433805	-	chr13:113244463-113246740	+	TUBGCP3	TCONS_00091056	1.102	0.566489
ARAlincRNA_0162	XLOC_035742	5.63085	0.0627258	-1.53449	-0.744295	0.532129	-	chr13:113257325-113258982	-	TUBGCP3	TCONS_00095425	0.283473	0.0978556
ARAlincRNA_0163	XLOC_035789	3.22288	0.0584403	0.402075	0.295097	0.772798	LINC00565,linc-GAS6-2	chr13:114629486-114637260	-	GAS6	TCONS_00095538;TCONS_00095537	0.278471	0.367974
ARAlincRNA_0164	XLOC_037776	5.80145	0.0517332	-0.216778	0.131556	0.941724	-	chr14:20775856-20777423	-	CTD-2292M16.8,FPKM1_group_8501_transcript_3,FPKM1_group_8501_transcript_4,TTC5	TCONS_00101967	0.41919	0.360706
ARAlincRNA_0165	XLOC_036189	8.7004	0.000159209	0.0833124	-0.0987749	0.936985	-	chr14:24912181-24916572	+	CBLN3	TCONS_00096724;TCONS_00096725	0.829794	0.879124
ARAlincRNA_0166	XLOC_038017	3.57873	0.0740878	-1.61662	-1.57142	0.276735	FPKM1_group_8575_transcript_1	chr14:24970799-24977894	-	CMA1	TCONS_00103261	0.604937	0.197269
ARAlincRNA_0167	XLOC_036274	6.1947	0.000798305	0.70599	0.974338	0.107935	FPKM1_group_8638_transcript_1,FPKM1_group_8639_transcript_1,RP11-148E17.1,linc-G2E3-4	chr14:29241909-29615982	+	PRKD1	TCONS_00096884;TCONS_00096872;TCONS_00096873;TCONS_00096871;TCONS_00096876;TCONS_00096874;TCONS_00096875;TCONS_00096885;TCONS_00096879;TCONS_00096883;TCONS_00096882;TCONS_00096881;TCONS_00096880	1.9889	3.24442
ARAlincRNA_0168	XLOC_038147	4.04416	0.0253552	-1.64429	-2.21504	1.56249e-07	CTD-2251F13.1	chr14:30045686-30766249	-	G2E3	TCONS_00103502;TCONS_00103501;TCONS_00103500;TCONS_00103507;TCONS_00103488;TCONS_00103489	4.2768	1.36817
ARAlincRNA_0169	XLOC_038290	6.63309	0.0153492	2.0217	1.65417	0.00414875	-	chr14:35863811-35867517	-	NFKBIA	TCONS_00103825;TCONS_00103826	1.12026	4.54894
ARAlincRNA_0170	XLOC_036532	6.43803	0.0210954	-1.5041	-0.947207	0.491189	-	chr14:41423764-41547931	+	FBXO33	TCONS_00097524	0.472255	0.166493
ARAlincRNA_0171	XLOC_036531	6.04317	0.037706	-0.285134	-0.000266742	0.999983	-	chr14:41423764-41547931	+	FBXO33	TCONS_00097523	1.17456	0.963925
ARAlincRNA_0172	XLOC_036771	5.91969	0.043488	-0.787418	-0.456556	0.862353	-	chr14:55369774-55370362	+	GCH1	TCONS_00098064	0.317777	0.184114
ARAlincRNA_0173	XLOC_039468	6.71393	0.0135151	0.0800333	0.441726	0.651928	FPKM1_group_9246_transcript_2	chr14:69997825-69998308	-	PLEKHD1	TCONS_00106168	2.76602	2.9238
ARAlincRNA_0174	XLOC_039476	6.3496	0.0237048	nan	-2.12988		-	chr14:70053820-70054704	-	KIAA0247	TCONS_00106177	0.198116	0
ARAlincRNA_0175	XLOC_037351	5.40121	0.0844615	1.65884	1.98734	0.117024	RP11-725G5.2,linc-GLRX5-2	chr14:95786502-95801841	+	CLMN,CTD-2240H23.2	TCONS_00100582;TCONS_00100583;TCONS_00100580;TCONS_00100581;TCONS_00100586;TCONS_00100587;TCONS_00100584;TCONS_00100585	0.0332092	0.104862
ARAlincRNA_0176	XLOC_037357	4.51213	0.0542593	-0.344272	-0.501963	0.658918	RP11-1070N10.5,linc-TCL1B-1	chr14:96087250-96110298	+	GLRX5	TCONS_00100601;TCONS_00100600;TCONS_00100602	0.638544	0.502985
ARAlincRNA_0177	XLOC_040232	5.56731	0.0677857	-0.0528019	-0.732563	0.550226	Y_RNA	chr14:99947505-100070363	-	CYP46A1	TCONS_00108220	5.44202	5.24644
ARAlincRNA_0178	XLOC_037623	6.82033	0.0118054	0.784475	0.0647185	0.968884	RP11-73M18.9	chr14:104019757-104181841	+	TRMT61A	TCONS_00101505	4.17583	7.19271
ARAlincRNA_0179	XLOC_040498	5.62262	0.0632212	0.490398	0.844675	0.629814	FPKM1_group_9673_transcript_1	chr14:105215998-105217344	-	SIVA1	TCONS_00108831	0.111406	0.156507
ARAlincRNA_0180	XLOC_037666	4.15375	0.0943849	-1.06624	-0.107525	0.953331	RP11-44N21.1,linc-BTBD6-1	chr14:105558410-105565891	+	CDCA4	TCONS_00101670;TCONS_00101668;TCONS_00101669;TCONS_00101664;TCONS_00101665;TCONS_00101666;TCONS_00101667;TCONS_00101660;TCONS_00101661;TCONS_00101662;TCONS_00101663;TCONS_00101657;TCONS_00101659;TCONS_00101658;TCONS_00101671	1.15005	0.549218
ARAlincRNA_0181	XLOC_040749	5.23259	0.0982987	5.16571	3.87607	0.000199823	FPKM1_group_9699_transcript_2	chr14:107217615-107218398	-	C14orf80,CRIP1	TCONS_00109211	0.0155923	0.559686
ARAlincRNA_0182	XLOC_040758	4.66896	0.042314	-0.202152	0.145158	0.925724	-	chr14:107244194-107247091	-	C14orf80,CRIP1	TCONS_00109220	0.404202	0.351354
ARAlincRNA_0183	XLOC_040812	6.32356	0.0244459	-0.0637768	0.022439	0.989339	-	chr15:20992545-20995972	+	DKFZP547L112	TCONS_00109289	0.660774	0.632199
ARAlincRNA_0184	XLOC_042452	5.0549	0.0225361	-0.831671	-0.265597	0.702275	FPKM1_group_9739_transcript_1	chr15:21102130-21103628	-	DKFZP547L112	TCONS_00115284	15.0725	8.46891
ARAlincRNA_0185	XLOC_042557	4.87698	0.0100131	-0.102573	-0.0695797	0.981799	FPKM1_group_9769_transcript_2	chr15:23681107-23681678	-	MKRN3	TCONS_00115488	0.526833	0.490676
ARAlincRNA_0186	XLOC_043098	6.10544	8.98278e-05	-0.0231273	0.35819	0.618291	FPKM1_group_10015_transcript_2,FPKM1_group_10016_transcript_2,FPKM1_group_10016_transcript_3,FPKM1_group_10024_transcript_1,RP11-624L4.1,linc-RASGRP1-2	chr15:39156357-39719396	-	THBS1	TCONS_00116555;TCONS_00116586;TCONS_00116554;TCONS_00116600;TCONS_00116559;TCONS_00116571;TCONS_00116570;TCONS_00116556;TCONS_00116558;TCONS_00116557;TCONS_00116545;TCONS_00116544;TCONS_00116547;TCONS_00116546;TCONS_00116552;TCONS_00116553;TCONS_00116543;TCONS_00116542	8.09373	7.96501
ARAlincRNA_0187	XLOC_043122	5.67644	0.00678925	0.5321	0.39976	0.589467	FPKM1_group_10025_transcript_2,RP11-265N7.1	chr15:39156357-39719396	-	THBS1	TCONS_00116583;TCONS_00116582	3.12475	4.51849
ARAlincRNA_0188	XLOC_043245	3.86198	0.0680835	0.721739	0.791474	0.201697	FPKM1_group_10050_transcript_1	chr15:41152306-41153003	-	RHOV	TCONS_00116858	3.00673	4.9586
ARAlincRNA_0189	XLOC_043285	5.75446	0.00543761	0.0346134	-0.40507	0.651258	RP11-23P13.7	chr15:42120282-42264776	-	PLA2G4E	TCONS_00116962	7.14152	7.31493
ARAlincRNA_0190	XLOC_043353	5.3642	0.0851745	-0.268933	-0.21854	0.9124	-	chr15:44579974-44580461	-	CASC4	TCONS_00117328	1.04736	0.869239
ARAlincRNA_0191	XLOC_043581	6.97647	0.00871802	0.479561	1.02616	0.01451	-	chr15:50994294-50995535	-	TRPM7	TCONS_00117882	4.15414	5.7922
ARAlincRNA_0192	XLOC_044263	6.18887	0.0321168	-2.98868	-2.8662	0.00186117	FPKM1_group_10435_transcript_1	chr15:70078040-70080501	-	TLE3	TCONS_00119674	0.360461	0.0454126
ARAlincRNA_0193	XLOC_041843	5.05161	0.0101907	0.616339	0.916427	0.226671	linc-ARID3B-1	chr15:74753605-74809300	+	UBL7	TCONS_00113046	0.269746	0.413516
ARAlincRNA_0194	XLOC_044451	3.9156	0.0748335	-0.575917	-0.326105	0.671288	FPKM1_group_10534_transcript_1	chr15:74890840-74988633	-	CYP1A1	TCONS_00120267	3.4962	2.34546
ARAlincRNA_0195	XLOC_041961	7.14023	0.00678925	-0.618692	-0.498368	0.617094	RP11-358L4.1	chr15:79704449-79707135	+	TMED3	TCONS_00113666;TCONS_00113665	1.15276	0.750746
ARAlincRNA_0196	XLOC_041997	4.19184	0.087338	-0.218749	-0.364205	0.581267	FPKM1_group_10626_transcript_1	chr15:81682290-81690600	+	TMC3	TCONS_00113804	1.33126	1.14397
ARAlincRNA_0197	XLOC_044861	4.05627	0.0270472	-0.358089	-0.557922	0.268152	FPKM1_group_10688_transcript_2,GOLGA6L5,RP11-182J1.12,UBE2Q2P1	chr15:85051115-85123406	-	ZSCAN2	TCONS_00121521;TCONS_00121523;TCONS_00121522;TCONS_00121524;TCONS_00121527;TCONS_00121529;TCONS_00121528;TCONS_00121530;TCONS_00121509;TCONS_00121508;TCONS_00121518;TCONS_00121519;TCONS_00121514;TCONS_00121515;TCONS_00121516;TCONS_00121517;TCONS_00121510;TCONS_00121511;TCONS_00121512;TCONS_00121513	91.3019	71.2335
ARAlincRNA_0198	XLOC_042119	4.93323	0.00679946	0.102999	-1.31885	0.333351	FPKM1_group_10798_transcript_1,RP11-217B1.2	chr15:89878282-89879406	+	POLG	TCONS_00114292;TCONS_00114291;TCONS_00114290	0.763328	0.819817
ARAlincRNA_0199	XLOC_042120	3.51977	0.0776361	-1.01605	-0.229677	0.836616	LINC00925,linc-C15orf42-2	chr15:89904809-89941720	+	POLG	TCONS_00114309;TCONS_00114308;TCONS_00114320;TCONS_00114301;TCONS_00114303;TCONS_00114302;TCONS_00114305;TCONS_00114304;TCONS_00114307;TCONS_00114306;TCONS_00114318;TCONS_00114319;TCONS_00114312;TCONS_00114313;TCONS_00114310;TCONS_00114311;TCONS_00114316;TCONS_00114317;TCONS_00114314;TCONS_00114315;TCONS_00114297;TCONS_00114296;TCONS_00114295;TCONS_00114294;TCONS_00114293;TCONS_00114299;TCONS_001…	1.31421	0.649836
ARAlincRNA_0200	XLOC_045210	3.82229	0.0770217	-0.268883	-0.956137	0.446682	CTD-3049M7.1,FPKM1_group_10881_transcript_1,FPKM1_group_10882_transcript_1	chr15:94133095-94651167	-	MCTP2	TCONS_00122318;TCONS_00122317;TCONS_00122331;TCONS_00122340;TCONS_00122333;TCONS_00122332;TCONS_00122326;TCONS_00122334;TCONS_00122336;TCONS_00122339;TCONS_00122341;TCONS_00122328;TCONS_00122329	0.86909	0.721312
ARAlincRNA_0201	XLOC_042299	5.93486	0.0430619	-0.0810852	-0.798025	0.661547	linc-SYNM-2	chr15:99192199-99675798	+	TTC23	TCONS_00114931	0.166576	0.157472
ARAlincRNA_0202	XLOC_045566	3.47818	0.09775	0.930139	0.87781	0.0600801	FPKM1_group_11090_transcript_1,FPKM1_group_11090_transcript_2,FPKM1_group_11090_transcript_3,PRKXP1	chr15:101087889-101191910	-	ASB7	TCONS_00122906;TCONS_00122904;TCONS_00122905;TCONS_00122902;TCONS_00122901	7.4277	14.1532
ARAlincRNA_0203	XLOC_042363	5.84686	0.0474963	-0.430303	0.413315	0.814767	-	chr15:102453224-102454494	+	TARSL2	TCONS_00115132	0.353092	0.262032
ARAlincRNA_0204	XLOC_047462	7.05415	0.00731588	-0.472089	-0.562166	0.401243	linc-TMEM8A-1	chr16:468194-475096	-	RAB11FIP3	TCONS_00131345;TCONS_00131340;TCONS_00131341;TCONS_00131342;TCONS_00131343	5.74434	4.14121
ARAlincRNA_0205	XLOC_047477	5.22599	0.0156448	-0.0531875	-0.258252	0.792818	-	chr16:762586-763277	-	METRN	TCONS_00131405	6.67211	6.43061
ARAlincRNA_0206	XLOC_047627	6.16301	0.0308038	0.446409	0.649687	0.669933	-	chr16:2877956-2879295	-	ZG16B	TCONS_00132035	0.401819	0.547537
ARAlincRNA_0207	XLOC_047631	5.19686	0.0160897	-0.123489	0.171381	0.940926	FPKM1_group_11156_transcript_1,LA16c-325D7.2,linc-PRSS22	chr16:2912384-2918212	-	PRSS22	TCONS_00132059;TCONS_00132058;TCONS_00132060;TCONS_00132061;TCONS_00132062;TCONS_00132063	0.329041	0.302048
ARAlincRNA_0208	XLOC_045839	5.71237	0.0567666	-1.89596	-0.80217		FPKM1_group_11167_transcript_3	chr16:4293874-4294398	+	TFAP4	TCONS_00124466	0.256592	0.068945
ARAlincRNA_0209	XLOC_045852	5.24225	0.0989855	-1.01925	-0.194471	0.884639	-	chr16:4510935-4511471	+	HMOX2	TCONS_00124499	0.717292	0.353892
ARAlincRNA_0210	XLOC_047747	5.42966	0.0794873	0.89652	0.276573	0.837776	-	chr16:4742052-4743150	-	NUDT16L1	TCONS_00132574	0.442543	0.823824
ARAlincRNA_0211	XLOC_045894	5.29276	0.0923754	-0.71712	-0.550197	0.665067	-	chr16:8743604-8744599	+	ABAT	TCONS_00124683	1.06736	0.649288
ARAlincRNA_0212	XLOC_046656	5.81881	0.05076	-0.360018	0.0915578	0.973731	-	chr16:54324622-54325002	+	IRX3	TCONS_00127670	1.57469	1.22693
ARAlincRNA_0213	XLOC_046657	6.33072	0.0245138	-1.42653	-1.79952	0.000134758	-	chr16:54325417-54326500	+	IRX3	TCONS_00127671	4.91123	1.8271
ARAlincRNA_0214	XLOC_049095	4.10603	0.0981076	-1.56304	-1.48575	0.132305	FPKM1_group_11660_transcript_2	chr16:54880942-54889110	-	IRX5	TCONS_00136002	0.380037	0.128619
ARAlincRNA_0215	XLOC_046856	5.37817	0.0846533	-0.0450031	-0.138653	0.930764	-	chr16:68272113-68274022	+	DDX28	TCONS_00129082	1.10658	1.0726
ARAlincRNA_0216	XLOC_046867	5.22114	0.0989855	-0.70569	-0.518829	0.789686	-	chr16:68482794-68483450	+	SMPD3	TCONS_00129171	0.988993	0.6064
ARAlincRNA_0217	XLOC_049441	4.1865	0.0958861	-0.534021	-0.468775	0.71535	FPKM1_group_11791_transcript_2,FPKM1_group_11791_transcript_3	chr16:68483941-68485756	-	SMPD3	TCONS_00137256;TCONS_00137257	1.36341	0.941611
ARAlincRNA_0218	XLOC_046928	5.70823	0.0566993	0.0639937	-0.255061	0.831853	RP11-49C24.1	chr16:70610203-70611571	+	SF3B3	TCONS_00129534	12.7093	13.2858
ARAlincRNA_0219	XLOC_047008	5.56085	0.0722941	0.271097	0.729146	0.592753	RP11-252A24.3	chr16:74330672-74403724	+	GLG1,RP11-252A24.7	TCONS_00129768	0.338706	0.408725
ARAlincRNA_0220	XLOC_049739	5.56731	0.0677857	0.0110558	-0.173475	0.838639	FPKM1_group_11909_transcript_1	chr16:74330672-74403724	-	PSMD7	TCONS_00137977	4.07133	4.10265
ARAlincRNA_0221	XLOC_049735	4.46392	0.0254926	0.0586567	-0.360723	0.612164	AC009120.6,FPKM1_group_11910_transcript_1,RP11-252A24.2	chr16:74330672-74403724	-	PSMD7	TCONS_00137980;TCONS_00137981;TCONS_00137966;TCONS_00137967;TCONS_00137965;TCONS_00137970;TCONS_00137982;TCONS_00137984;TCONS_00137983;TCONS_00137979;TCONS_00137978;TCONS_00137968;TCONS_00137969	15.5886	16.2354
ARAlincRNA_0222	XLOC_049920	4.16848	0.0949308	2.36259	2.48046	8.97041e-11	FPKM1_group_11993_transcript_1	chr16:80620258-80627278	-	CDYL2	TCONS_00138446;TCONS_00138447	0.330005	1.69719
ARAlincRNA_0223	XLOC_050003	6.83057	0.0109893	0.843477	0.202816	0.903624	-	chr16:82257500-82259425	-	MPHOSPH6	TCONS_00138630	0.3696	0.663199
ARAlincRNA_0224	XLOC_047244	5.81706	0.0528508	-2.82075	-1.67145	0.207126	-	chr16:85554581-85555309	+	GSE1	TCONS_00130382	0.810089	0.114657
ARAlincRNA_0225	XLOC_050203	6.03578	0.0369737	nan	-1.11224		FPKM1_group_12112_transcript_4	chr16:88268390-88336117	-	ZFPM1	TCONS_00139199;TCONS_00139198	0.195498	0
ARAlincRNA_0226	XLOC_050236	7.21317	0.00562819	-0.649437	-0.467819	0.674984	-	chr16:88634940-88636193	-	ZC3H18	TCONS_00139243	1.39597	0.88997
ARAlincRNA_0227	XLOC_047401	8.28748	0.000493099	0.85016	0.744445	0.172477	-	chr16:89299609-89302221	+	ZNF778	TCONS_00130822	2.64977	4.77674
ARAlincRNA_0228	XLOC_047402	6.67545	0.014199	-0.207372	0.50007	0.66972	-	chr16:89302413-89304005	+	AC137932.1	TCONS_00130823	0.481473	0.41701
ARAlincRNA_0229	XLOC_050306	5.29276	0.0923754	-2.9903	-0.730974	0.719678	linc-C17orf97-2	chr17:56208-56601	+	RPH3AL	TCONS_00139569	0.830369	0.104497
ARAlincRNA_0230	XLOC_050402	6.37262	0.0228197	0.276995	0.564787	0.414231	-	chr17:4547024-4547876	+	ALOX15,FPKM1_group_12189_transcript_1	TCONS_00139902	3.60933	4.37332
ARAlincRNA_0231	XLOC_052779	5.95905	0.0411368	0.128141	-0.574157	0.730075	LINC00324	chr17:8123959-8127361	-	PFAS	TCONS_00150432	0.365595	0.399553
ARAlincRNA_0232	XLOC_052935	4.28254	0.00219899	-0.503923	0.191182	0.828966	COX10-AS1,FPKM1_group_12342_transcript_1,FPKM1_group_12346_transcript_1,linc-HS3ST3A1-1	chr17:13659794-13972812	-	ELAC2	TCONS_00150918;TCONS_00150919;TCONS_00150865;TCONS_00150920;TCONS_00150875;TCONS_00150848;TCONS_00150849;TCONS_00150846;TCONS_00150847;TCONS_00150844;TCONS_00150845;TCONS_00150842;TCONS_00150843;TCONS_00150866	3.89123	2.74404
ARAlincRNA_0233	XLOC_050629	6.42389	0.0214807	-0.324365	-2.31863		FPKM1_group_12403_transcript_1	chr17:15693863-15694823	+	TBC1D26,ZNF286A	TCONS_00141126	0.230292	0.183923
ARAlincRNA_0234	XLOC_050689	5.63672	0.0634058	0.214497	-0.150109	0.910795	-	chr17:17400437-17402513	+	RASD1	TCONS_00141383	1.48709	1.72547
ARAlincRNA_0235	XLOC_053289	5.8756	0.045804	-0.354425	-2.76632	0.0395408	FPKM1_group_12495_transcript_1	chr17:19911353-19912606	-	SPECC1	TCONS_00151883;TCONS_00151884	0.332294	0.259914
ARAlincRNA_0236	XLOC_050847	5.33197	0.00357941	-0.553855	0.00288982	0.998745	RP11-1109M24.5	chr17:21793030-21814739	+	UBBP4	TCONS_00142100;TCONS_00142101;TCONS_00142098;TCONS_00142099	0.890023	0.606281
ARAlincRNA_0237	XLOC_053423	5.43343	0.0791931	-2.39358	-0.644922		RP11-663N22.1	chr17:25564884-25568687	-	WSB1	TCONS_00152127	0.146542	0.0278885
ARAlincRNA_0238	XLOC_053464	3.47699	0.0601868	-1.03016	-0.905882	0.118902	CTD-2008P7.9,linc-C17orf108-1	chr17:26557601-26562307	-	AC061975.10	TCONS_00152185;TCONS_00152184;TCONS_00152183	2.14261	1.04914
ARAlincRNA_0239	XLOC_050996	5.3249	0.0886333	0.126449	0.537778	0.522425	CTD-2349P21.9	chr17:29036316-29151794	+	CRLF3	TCONS_00142658	16.5885	18.1081
ARAlincRNA_0240	XLOC_053797	5.76727	0.0529827	-1.10329	-1.60742	0.159424	-	chr17:34899847-34900499	-	GGNBP2	TCONS_00153375	1.6204	0.754218
ARAlincRNA_0241	XLOC_051242	5.78609	0.0531859	-1.34551	-1.15059	0.156072	RP11-387H17.4,linc-LOC728129-1	chr17:38083994-38096062	+	ORMDL3	TCONS_00143622;TCONS_00143623;TCONS_00143626;TCONS_00143627;TCONS_00143624;TCONS_00143625	0.658886	0.259281
ARAlincRNA_0242	XLOC_051320	5.24443	0.0965606	0.0196853	0.191424	0.876256	-	chr17:40829267-40830028	+	PLEKHH3	TCONS_00144021	5.19918	5.27061
ARAlincRNA_0243	XLOC_051349	5.41948	0.0799379	-0.835563	-0.745833	0.141929	-	chr17:41399697-41407003	+	NBR1	TCONS_00144181	5.19284	2.90988
ARAlincRNA_0244	XLOC_054294	3.86879	0.0627824	-0.124127	-1.24345	0.272662	FPKM1_group_12796_transcript_1	chr17:42768282-42769723	-	CCDC43	TCONS_00155160	0.486016	0.445949
ARAlincRNA_0245	XLOC_054411	4.31908	0.0723695	0.279071	0.128038	0.934367	FPKM1_group_12835_transcript_1	chr17:44338204-44338774	-	LRRC37A2	TCONS_00155500	3.3299	4.04054
ARAlincRNA_0246	XLOC_051477	6.35502	0.0251538	-0.443345	-0.133973	0.957036	-	chr17:44657202-44658458	+	ARL17B	TCONS_00144620	0.438518	0.322498
ARAlincRNA_0247	XLOC_051542	6.21572	0.0287089	0.249415	0.278921	0.809774	FPKM1_group_12866_transcript_1	chr17:46822226-46824829	+	HOXB13	TCONS_00145003	0.691449	0.821943
ARAlincRNA_0248	XLOC_051544	5.51798	0.0724871	-0.763226	0.0785597	0.973731	FPKM1_group_12868_transcript_3	chr17:46830275-46832095	+	HOXB13	TCONS_00145005	0.232358	0.1369
ARAlincRNA_0249	XLOC_051705	8.70229	0.000159209	-0.0510228	0.179063	0.876991	-	chr17:56084983-56088345	+	RP11-159D12.2,RP11-159D12.5,SRSF1,linc-VEZF1	TCONS_00145844	0.850351	0.820803
ARAlincRNA_0250	XLOC_054991	3.82588	0.0727913	-0.115416	-0.523403	0.342703	CTD-2319I12.4	chr17:58203453-58213006	-	USP32	TCONS_00156967;TCONS_00156966;TCONS_00156970;TCONS_00156971;TCONS_00156969;TCONS_00156968	14.0842	13.0014
ARAlincRNA_0251	XLOC_051843	5.53046	0.0703724	-0.272312	-2.72583	0.0440141	FPKM1_group_13120_transcript_1	chr17:61525301-61526415	+	CYB561,RP11-269G24.4	TCONS_00146315	0.693557	0.574259
ARAlincRNA_0252	XLOC_055440	3.37384	0.0648191	-0.172255	0.19541	0.896901	FPKM1_group_13288_transcript_1,LINC00511,linc-ABCA5-3,linc-ABCA5-5	chr17:70319263-70636611	-	SLC39A11	TCONS_00158183;TCONS_00158182;TCONS_00158187;TCONS_00158186;TCONS_00158185;TCONS_00158184;TCONS_00158189;TCONS_00158188;TCONS_00158200;TCONS_00158201;TCONS_00158202;TCONS_00158203;TCONS_00158204;TCONS_00158205;TCONS_00158207;TCONS_00158169;TCONS_00158168;TCONS_00158165;TCONS_00158164;TCONS_00158167;TCONS_00158166;TCONS_00158163;TCONS_00158194;TCONS_00158195;TCONS_00158196;TCONS_00158197;TCONS_001…	0.6552	0.58146
ARAlincRNA_0253	XLOC_052037	6.59913	0.0167822	-0.198853	0.131163	0.936066	-	chr17:72978798-72980929	+	CDR2L	TCONS_00147064	0.500083	0.435693
ARAlincRNA_0254	XLOC_055548	5.74334	0.056309	-0.974387	-0.42263	0.868844	-	chr17:73104829-73105072	-	ARMC7	TCONS_00158499	1.80075	0.916503
ARAlincRNA_0255	XLOC_052180	4.90854	0.027679	0.153777	0.0329884	0.983571	linc-CCDC40-3	chr17:77790197-77794489	+	CBX8	TCONS_00147888;TCONS_00147889	2.9478	3.27936
ARAlincRNA_0256	XLOC_052266	4.76379	0.0150366	-0.779833	-0.208042	0.936641	RP13-650J16.1,linc-GPS1	chr17:79995780-79997256	+	DCXR	TCONS_00148366;TCONS_00148367;TCONS_00148365	0.485838	0.282968
ARAlincRNA_0257	XLOC_055927	4.08913	0.0621649	-0.0329457	-0.155283	0.931415	RP13-516M14.4	chr17:80247921-80250690	-	SLC16A3	TCONS_00160181	0.365389	0.357139
ARAlincRNA_0258	XLOC_055934	4.82789	0.0154131	-0.203164	0.202773	0.876894	linc-SECTM1-2	chr17:80311076-80315022	-	SECTM1	TCONS_00160208	0.728723	0.633
ARAlincRNA_0259	XLOC_055955	4.87943	0.0298497	nan	-0.732218	0.715724	FPKM1_group_13493_transcript_1,FPKM1_group_13493_transcript_2,RP11-388C12.1,linc-RAB40B	chr17:80662012-80674132	-	FN3KRP	TCONS_00160333;TCONS_00160332;TCONS_00160331;TCONS_00160337;TCONS_00160336;TCONS_00160335	0.354405	0
ARAlincRNA_0260	XLOC_057004	5.28676	0.0924832	0.442364	0.25848	0.925788	FPKM1_group_13521_transcript_3	chr18:1649698-1824885	-	METTL4	TCONS_00163503;TCONS_00163504	0.422028	0.573464
ARAlincRNA_0261	XLOC_057579	4.84519	0.0388762	0.789596	0.735844	0.508297	TU_0056121_0, PCAT-67	chr18:21718941-21977844	-	IMPACT	TCONS_00164691	0.860304	1.48711
ARAlincRNA_0262	XLOC_056340	5.24697	0.0962056	-1.03052	-1.70904	0.293559	RP11-621L6.3,linc-IMPACT-1	chr18:21978414-21982678	+	OSBPL1A,RP11-799B12.4	TCONS_00161527;TCONS_00161526	0.207176	0.101419
ARAlincRNA_0263	XLOC_056365	5.98999	0.0424161	6.19673	3.53924	0.00135994	linc-DSG1-7	chr18:24034873-24770662	+	TAF4B	TCONS_00161590;TCONS_00161591	0.0392599	2.87972
ARAlincRNA_0264	XLOC_058012	6.15766	0.00232946	2.06431	1.93626	0.172954	FPKM1_group_13948_transcript_2	chr18:41363187-41365931	-	SYT4	TCONS_00165532;TCONS_00165533	2.25433	9.42841
ARAlincRNA_0265	XLOC_058033	4.70915	0.0219352	0.477686	0.492879	0.700057	RP11-456K23.1,linc-SYT4-1	chr18:42256891-42259682	-	SETBP1	TCONS_00165563;TCONS_00165562	0.285097	0.396999
ARAlincRNA_0266	XLOC_058660	5.77723	0.0525565	inf	3.5189	0.000116477	linc-NETO1-1	chr18:71336694-71358606	-	FBXO15	TCONS_00167089;TCONS_00167094;TCONS_00167093;TCONS_00167092;TCONS_00167091;TCONS_00167090	0	0.752877
ARAlincRNA_0267	XLOC_056885	5.74555	0.0542593	-0.681825	-0.565076	0.787631	-	chr18:72784066-72784569	+	ZADH2	TCONS_00163108	0.661313	0.412247
ARAlincRNA_0268	XLOC_056886	7.74627	0.00184065	0.0626049	0.574828	0.760751	-	chr18:72785306-72786140	+	ZADH2	TCONS_00163109	0.414825	0.433222
ARAlincRNA_0269	XLOC_058706	5.51852	0.0748335	-1.93044	-4.92315	5.1207e-07	-	chr18:73897274-73900105	-	LINC00908,linc-ZNF236-3,linc-ZNF236-4	TCONS_00167183;TCONS_00167182	1.19633	0.313856
ARAlincRNA_0270	XLOC_056893	4.29313	0.0120476	-0.87679	-1.50271	0.0576622	FPKM1_group_14247_transcript_1,linc-ZNF236-6	chr18:73931072-73972069	+	LINC00908,linc-ZNF236-3,linc-ZNF236-4	TCONS_00163130;TCONS_00163131;TCONS_00163132;TCONS_00163133	0.541396	0.294832
ARAlincRNA_0271	XLOC_058847	5.56168	0.0690202	-0.331382	-0.905791	0.599999	-	chr19:633601-634445	+	POLRMT	TCONS_00167532	0.763707	0.606975
ARAlincRNA_0272	XLOC_058882	4.00795	0.0603925	0.72537	-0.19761	0.89632	-	chr19:1174328-1175224	+	SBNO2	TCONS_00167733	0.769824	1.27277
ARAlincRNA_0273	XLOC_061070	6.38473	0.0225568	-1.57139	-1.40564	0.365541	-	chr19:2492567-2493044	-	GADD45B	TCONS_00177879	1.1069	0.372455
ARAlincRNA_0274	XLOC_061071	5.87339	0.0460109	-0.136831	-0.266346	0.916397	-	chr19:2493208-2493940	-	GADD45B	TCONS_00177880	0.634368	0.576967
ARAlincRNA_0275	XLOC_059011	5.88028	0.0456654	0.798835	0.720898	0.52334	-	chr19:4800191-4801061	+	TICAM1	TCONS_00168461	1.59471	2.77431
ARAlincRNA_0276	XLOC_059122	7.4346	0.00349258	-0.664745	-0.75569	0.395393	-	chr19:8329575-8331240	+	RPS28	TCONS_00168978	0.773391	0.487855
ARAlincRNA_0277	XLOC_061419	3.86555	0.0744437	0.403146	-0.264948	0.747322	-	chr19:9630821-9650405	-	ZNF266,ZNF560	TCONS_00179156	6.37025	8.42394
ARAlincRNA_0278	XLOC_059246	5.05492	0.00924014	-0.134074	-0.0881914	0.945201	CTC-499B15.4,CTD-2006C1.6,ZNF833P	chr19:11750590-11797382	+	ACP5	TCONS_00169622;TCONS_00169623;TCONS_00169621;TCONS_00169626;TCONS_00169624;TCONS_00169625;TCONS_00169628;TCONS_00169629	1.84894	1.68485
ARAlincRNA_0279	XLOC_059557	5.72247	0.0566993	0.155314	0.819341	0.219871	-	chr19:20996359-20998194	+	ZNF66	TCONS_00171293	0.723836	0.80611
ARAlincRNA_0280	XLOC_059777	7.96788	9.28582e-06	-0.404891	-1.0347	0.043734	CEBPA-AS1,CTD-2540B15.9,linc-CEBPG	chr19:33793762-33800293	+	AC008738.1,CEBPA	TCONS_00171869;TCONS_00171868;TCONS_00171870;TCONS_00171871;TCONS_00171872	6.44477	4.86769
ARAlincRNA_0281	XLOC_062394	4.98304	0.0254832	-1.20802	-1.44241	0.104282	CTC-523E23.1	chr19:35279485-35351480	-	ZNF30	TCONS_00182358	0.34955	0.151307
ARAlincRNA_0282	XLOC_060060	6.90285	0.00963152	-0.573943	-0.42264	0.586303	CTC-490E21.10	chr19:41277552-41406413	+	ADCK4	TCONS_00173555	1.13893	0.765108
ARAlincRNA_0283	XLOC_062742	6.159	0.0310253	-0.317872	-0.564242	0.802114	AC006129.1	chr19:42037035-42038534	-	ATP5SL	TCONS_00183811	0.325365	0.261025
ARAlincRNA_0284	XLOC_060608	5.56045	0.0680401	2.0271	2.22645	5.90366e-07	-	chr19:53964130-53965032	+	CTD-2224J9.4,CTD-2224J9.8,ZNF813	TCONS_00176001	3.53864	14.4229
ARAlincRNA_0285	XLOC_060744	7.6232	0.00240421	0.060194	-0.343354	0.869209	-	chr19:55896066-55896598	+	TMEM238	TCONS_00176522	2.16601	2.2583
ARAlincRNA_0286	XLOC_060804	6.37728	0.00173761	-0.53625	-0.112728	0.955368	MIMT1,linc-USP29-1	chr19:57352218-57359924	+	PEG3,ZIM2	TCONS_00176794;TCONS_00176795;TCONS_00176792;TCONS_00176793	0.841203	0.580061
ARAlincRNA_0287	XLOC_063574	7.52689	0.00288061	0.348743	0.249704	0.766974	-	chr19:58910735-58911348	-	CTD-2619J13.16,ZNF584	TCONS_00187414	1.41468	1.80153
ARAlincRNA_0288	XLOC_060903	6.4347	0.0208213	0.519743	0.715109	0.400059	CTD-2619J13.13	chr19:58911587-58912538	+	CTD-2619J13.16,ZNF584	TCONS_00177204	3.84947	5.51898
ARAlincRNA_0289	XLOC_060906	5.85047	0.0473931	0.553907	0.65659	0.311823	CTD-2619J13.17	chr19:58912870-58951589	+	AC012313.1	TCONS_00177221	2.17049	3.1864
ARAlincRNA_0290	XLOC_063592	7.09384	0.00690399	0.0143934	-0.272991	0.909143	FPKM1_group_15029_transcript_1	chr19:59070495-59111168	-	UBE2M	TCONS_00187486	0.453323	0.457868
ARAlincRNA_0291	XLOC_063617	4.13113	0.0977186	0.0385022	-0.430446	0.774027	linc-TTC15-5	chr2:1753645-1757701	+	PXDN	TCONS_00187598;TCONS_00187597	0.355018	0.36462
ARAlincRNA_0292	XLOC_063668	4.19076	0.0488859	0.762137	1.19004	0.114763	linc-ID2-1	chr2:8806765-8824583	+	KIDINS220	TCONS_00187767	0.0684662	0.116119
ARAlincRNA_0293	XLOC_068126	5.60359	0.00710404	-0.119924	-0.0552102	0.980702	-	chr2:32580961-32581793	-	BIRC6	TCONS_00201897	0.669791	0.616366
ARAlincRNA_0294	XLOC_069134	6.10503	0.033502	-0.272373	-0.394587	0.863011	FPKM1_group_16219_transcript_1	chr2:62421665-62422204	-	B3GNT2	TCONS_00203866	0.486511	0.40281
ARAlincRNA_0295	XLOC_069542	4.79784	0.0403624	-1.8768	-0.413576	0.880967	RP11-467P9.1	chr2:71163011-71306935	-	MCEE	TCONS_00204730	0.448102	0.122012
ARAlincRNA_0296	XLOC_069608	5.36364	0.0851675	0.630811	0.639386	0.681215	FPKM1_group_16452_transcript_1	chr2:73954510-73955520	-	TPRKB	TCONS_00204869	0.322923	0.500025
ARAlincRNA_0297	XLOC_069631	6.01413	0.038014	nan	-1.59131	0.350568	-	chr2:74345625-74345994	-	BOLA3	TCONS_00204912	0.623188	0
ARAlincRNA_0298	XLOC_069632	5.38575	0.0852212	-0.0786656	0.0306252	0.991835	-	chr2:74346186-74347301	-	BOLA3	TCONS_00204913	0.303862	0.287737
ARAlincRNA_0299	XLOC_064516	3.41336	0.0562989	-0.191658	-0.399886	0.543159	AC104135.3,AC104135.4,FPKM1_group_16474_transcript_1,linc-POLE4	chr2:75145003-75170624	+	POLE4	TCONS_00191021;TCONS_00191020;TCONS_00191026;TCONS_00191025;TCONS_00191024;TCONS_00191023;TCONS_00191022;TCONS_00191018;TCONS_00191019;TCONS_00191016;TCONS_00191017;TCONS_00191014;TCONS_00191015;TCONS_00191012;TCONS_00191013	6.63752	5.8118
ARAlincRNA_0300	XLOC_064665	4.85649	0.0299772	-0.500294	-1.58505	0.0384543	FPKM1_group_16673_transcript_1	chr2:88316305-88320971	+	KRCC1	TCONS_00191471	0.951811	0.672895
ARAlincRNA_0301	XLOC_070100	5.62634	0.063234	-0.338731	-0.283295	0.885404	FPKM1_group_16676_transcript_1,FPKM1_group_16676_transcript_2	chr2:88487626-88489157	-	THNSL2	TCONS_00205950;TCONS_00205949	0.621015	0.491059
ARAlincRNA_0302	XLOC_064766	6.42185	0.0211389	0.0653837	0.308275	0.732118	-	chr2:95885832-95889194	+	PROM2	TCONS_00191634	1.37421	1.43792
ARAlincRNA_0303	XLOC_070274	4.47247	0.0576599	-0.238935	-0.397871	0.506301	FPKM1_group_16727_transcript_1	chr2:96199791-96201769	-	FAHD2A	TCONS_00206194	7.93389	6.72295
ARAlincRNA_0304	XLOC_070283	4.13516	0.0940885	-0.831242	-0.640221	0.286259	LINC00342	chr2:96472865-96485206	-	ANKRD36C,linc-TRIM43B-2	TCONS_00206206;TCONS_00206207;TCONS_00206205;TCONS_00206210;TCONS_00206208;TCONS_00206209	8.32249	4.67761
ARAlincRNA_0305	XLOC_070287	6.51196	0.018486	-0.860138	-0.807608	0.206511	-	chr2:96490038-96493285	-	ANKRD36C,linc-TRIM43B-2	TCONS_00206214	2.49092	1.37225
ARAlincRNA_0306	XLOC_064893	4.86144	0.014384	-0.576193	-0.892763	0.355128	RP11-299H21.1	chr2:101436613-101886780	+	PDCL3	TCONS_00192092	0.365454	0.245122
ARAlincRNA_0307	XLOC_070505	5.15365	0.0174638	0.123007	-0.641544	0.788806	RP11-332H14.1	chr2:105865860-105866251	-	AC012360.2,TGFBRAP1	TCONS_00206920	0.598412	0.651673
ARAlincRNA_0308	XLOC_070972	4.90391	0.0291531	0.150396	0.977667	0.498602	linc-C1QL2	chr2:120030213-120040231	-	STEAP3	TCONS_00207777;TCONS_00207776;TCONS_00207778	0.374355	0.415487
ARAlincRNA_0309	XLOC_065183	5.8234	0.0495056	-0.466945	-0.476266	0.686119	-	chr2:120446871-120448187	+	TMEM177	TCONS_00193069	1.00171	0.724734
ARAlincRNA_0310	XLOC_071284	2.93475	0.0927306	2.60773	2.55767	5.49344e-10	AC018865.8,CYP4F27P,FPKM1_group_17195_transcript_2,FPKM1_group_17196_transcript_1,FPKM1_group_17196_transcript_2	chr2:130748028-130808704	-	POTEF	TCONS_00208305;TCONS_00208304;TCONS_00208307;TCONS_00208306;TCONS_00208301;TCONS_00208300;TCONS_00208310;TCONS_00208302;TCONS_00208311;TCONS_00208309;TCONS_00208308;TCONS_00208314;TCONS_00208315;TCONS_00208299;TCONS_00208298;TCONS_00208317;TCONS_00208316;TCONS_00208313	13.6974	83.4913
ARAlincRNA_0311	XLOC_065315	5.51703	0.0736168	1.35078	0.729623	0.698104	-	chr2:131107901-131108120	+	CCDC115	TCONS_00193437	2.0611	5.25685
ARAlincRNA_0312	XLOC_071312	6.95837	0.00871802	-1.44481	-0.29971	0.909335	-	chr2:131112410-131112992	-	PTPN18	TCONS_00208402	0.398883	0.146526
ARAlincRNA_0313	XLOC_071317	5.37726	0.0127181	1.43664	2.3374	1.59565e-10	AC140481.1,CYP4F43P,FPKM1_group_17205_transcript_1	chr2:131174320-131199048	-	AC013269.1,POTEI	TCONS_00208414;TCONS_00208419;TCONS_00208418;TCONS_00208408;TCONS_00208409;TCONS_00208420;TCONS_00208421;TCONS_00208422;TCONS_00208411;TCONS_00208410;TCONS_00208413;TCONS_00208412;TCONS_00208415;TCONS_00208407;TCONS_00208417;TCONS_00208416	5.13257	13.8933
ARAlincRNA_0314	XLOC_071573	4.25623	0.0384386	-0.170932	-0.210248	0.81257	AC097721.2,FPKM1_group_17285_transcript_1,FPKM1_group_17288_transcript_2,FPKM1_group_17288_transcript_4,FPKM1_group_17290_transcript_1,FPKM1_group_17290_transcript_2,FPKM1_group_17296_transcript_1	chr2:139175853-139259268	-	AC092620.2,SPOPL	TCONS_00208798;TCONS_00208825;TCONS_00208796;TCONS_00208797;TCONS_00208831;TCONS_00208815;TCONS_00208807;TCONS_00208816;TCONS_00208810;TCONS_00208826;TCONS_00208812;TCONS_00208808;TCONS_00208809	4.32831	3.84471
ARAlincRNA_0315	XLOC_071707	5.71221	0.056398	0.151891	0.509535	0.743946	FPKM1_group_17342_transcript_1,FPKM1_group_17342_transcript_2	chr2:150421045-150424031	-	LYPD6	TCONS_00209070;TCONS_00209071	0.169264	0.188057
ARAlincRNA_0316	XLOC_071975	5.50518	0.0741846	-0.949789	-1.10812	0.0506346	AC093375.1,FPKM1_group_17474_transcript_1,FPKM1_group_17475_transcript_1	chr2:156866282-156881201	-	GPD2	TCONS_00209465;TCONS_00209464;TCONS_00209463;TCONS_00209462;TCONS_00209461	1.80313	0.933496
ARAlincRNA_0317	XLOC_072042	4.83071	0.00436442	-0.327224	-0.484427	0.40209	FPKM1_group_17485_transcript_1,FPKM1_group_17485_transcript_2,FPKM1_group_17485_transcript_3	chr2:157014091-157020027	-	GPD2	TCONS_00209535;TCONS_00209537;TCONS_00209536;TCONS_00209538	1.5954	1.27164
ARAlincRNA_0318	XLOC_065599	6.08422	0.0350074	2.03731	1.46565		AC008063.3	chr2:162949938-162951364	+	DPP4	TCONS_00194405	0.0382031	0.156816
ARAlincRNA_0319	XLOC_072370	5.41742	0.0811406	3.65392	2.03227	0.137154	-	chr2:170439282-170439502	-	PPIG	TCONS_00210289	0.293762	3.69773
ARAlincRNA_0320	XLOC_072447	5.53882	0.0710326	-1.52482	-1.6832		-	chr2:173289966-173290466	-	PDK1	TCONS_00210509	0.336627	0.116985
ARAlincRNA_0321	XLOC_072521	5.26306	0.0958522	0.416504	0.849848	0.598806	FPKM1_group_17667_transcript_4	chr2:175353566-175354131	-	GPR155	TCONS_00210639	0.400248	0.534207
ARAlincRNA_0322	XLOC_065895	6.7196	0.0130855	0.884654	0.746342	0.136007	TU_0120924_0	chr2:181402890-181719240	+	UBE2E3,linc-ITGA4-2	TCONS_00195324	20.4669	37.7884
ARAlincRNA_0323	XLOC_065894	7.08305	0.0068238	0.72055	0.817278	0.0991551	TU_0120924_0	chr2:181402890-181719240	+	UBE2E3,linc-ITGA4-2	TCONS_00195323	36.1921	59.6378
ARAlincRNA_0324	XLOC_065885	6.71038	0.0133517	0.806153	0.572831	0.31171	TU_0120924_0	chr2:181402890-181719240	+	UBE2E3,linc-ITGA4-2	TCONS_00195314	15.3701	26.8753
ARAlincRNA_0325	XLOC_065884	5.69718	0.0577226	0.208754	0.268516	0.744863	TU_0120924_0	chr2:181402890-181719240	+	UBE2E3,linc-ITGA4-2	TCONS_00195313	31.405	36.2944
ARAlincRNA_0326	XLOC_072821	4.15376	0.0929872	0.00150563	0.198917	0.841624	FPKM1_group_17778_transcript_4	chr2:181729299-181731175	-	UBE2E3,linc-ITGA4-2	TCONS_00211281	5.39292	5.39855
ARAlincRNA_0327	XLOC_072825	4.54929	0.0682815	0.0467442	-0.0364676	0.976974	FPKM1_group_17779_transcript_1	chr2:181738270-181746583	-	UBE2E3,linc-ITGA4-2	TCONS_00211286	11.6113	11.9936
ARAlincRNA_0328	XLOC_073269	5.56927	0.0675977	-2.34868	-2.00866	0.00892266	-	chr2:188433293-188449840	-	TFPI	TCONS_00211900	0.955312	0.187553
ARAlincRNA_0329	XLOC_073351	4.84851	0.0305213	-0.18213	-0.156232	0.9178	FPKM1_group_18007_transcript_4	chr2:188560056-189152418	-	GULP1	TCONS_00211999	1.01352	0.893317
ARAlincRNA_0330	XLOC_073296	5.29276	0.0923754	0.676199	-0.739329	0.631639	AC068718.1,FPKM1_group_18007_transcript_2,FPKM1_group_18007_transcript_3	chr2:188560056-189152418	-	GULP1	TCONS_00211980;TCONS_00212001;TCONS_00211938;TCONS_00212000	4.49209	7.17802
ARAlincRNA_0331	XLOC_073309	5.96271	0.0409615	-1.50947	-1.76482	0.0147736	FPKM1_group_17977_transcript_1	chr2:188560056-189152418	-	GULP1	TCONS_00211952	1.66644	0.585319
ARAlincRNA_0332	XLOC_073731	5.40852	0.0819673	-1.28208	-0.737748	0.642264	-	chr2:205409467-205410090	-	PARD3B	TCONS_00212976	1.48391	0.610188
ARAlincRNA_0333	XLOC_074341	4.59866	0.059853	-0.706972	-0.535391	0.77246	AC105344.2,linc-GPR55	chr2:231849082-231860752	-	C2orf72	TCONS_00214498;TCONS_00214499;TCONS_00214497;TCONS_00214506;TCONS_00214507;TCONS_00214504;TCONS_00214505;TCONS_00214502;TCONS_00214503;TCONS_00214500;TCONS_00214501;TCONS_00214511;TCONS_00214510;TCONS_00214508;TCONS_00214509	0.162278	0.0994122
ARAlincRNA_0334	XLOC_066624	5.76761	0.0532732	0.129561	-0.110934	0.96413	AC017104.6	chr2:232253686-232259702	+	NCL,SNORA75	TCONS_00198072;TCONS_00198071;TCONS_00198070;TCONS_00198069	0.710347	0.777091
ARAlincRNA_0335	XLOC_074386	5.67714	0.0597713	-0.736323	-0.321708	0.843599	-	chr2:232567990-232569282	-	PTMA	TCONS_00214582	1.00776	0.604928
ARAlincRNA_0336	XLOC_074725	6.52053	0.0191849	0.0158551	0.105798	0.918954	-	chr2:241574030-241576080	-	CAPN10,GPR35	TCONS_00215230	4.3057	4.35328
ARAlincRNA_0337	XLOC_066783	5.47282	0.0795925	0.771766	1.5995	0.0115449	-	chr2:242041885-242043014	+	SNED1	TCONS_00198896	0.732884	1.2513
ARAlincRNA_0338	XLOC_074809	4.62914	0.00240492	1.7523	1.36801	0.000212341	linc-DTYMK-3	chr2:242671428-242673870	-	D2HGDH,GAL3ST2	TCONS_00215536	3.68709	12.4216
ARAlincRNA_0339	XLOC_066821	5.42966	0.0794873	-0.309452	-0.30385	0.653194	AC093642.3	chr2:242823513-243026749	+	NEU4	TCONS_00199205;TCONS_00199204;TCONS_00199203;TCONS_00199202;TCONS_00199201;TCONS_00199200;TCONS_00199199	9.23175	7.44954
ARAlincRNA_0340	XLOC_074841	7.42846	0.00353137	1.6787	1.14603	0.124277	linc-PDCD1-3	chr2:243163399-243177007	-	AC131097.4,linc-PDCD1-1	TCONS_00215589;TCONS_00215593	0.605135	1.93727
ARAlincRNA_0341	XLOC_075939	5.54842	0.0690973	-0.431259	-0.671483	0.237933	-	chr20:292131-295422	-	NRSN2	TCONS_00219157	1.69226	1.255
ARAlincRNA_0342	XLOC_074923	6.00911	0.0411286	0.239776	-0.0798208	0.950056	-	chr20:3220788-3223563	+	SLC4A11	TCONS_00215875	1.78128	2.10335
ARAlincRNA_0343	XLOC_074924	5.2809	0.0932949	-0.62285	-1.19004	0.225264	-	chr20:3224191-3225182	+	SLC4A11	TCONS_00215876	1.60619	1.04304
ARAlincRNA_0344	XLOC_076111	5.73445	0.0567666	-1.15114	-0.785723	0.660576	-	chr20:3449462-3450059	-	ATRN	TCONS_00219529	0.436039	0.196334
ARAlincRNA_0345	XLOC_076112	5.7324	0.0561556	-1.69446	-2.03976	0.0646993	-	chr20:3450399-3450948	-	ATRN	TCONS_00219530	1.05266	0.32524
ARAlincRNA_0346	XLOC_076113	5.56281	0.0701548	-1.29728	-2.43013	0.0109467	-	chr20:3451027-3451576	-	ATRN	TCONS_00219531	2.98411	1.21421
ARAlincRNA_0347	XLOC_074939	5.28447	0.0925227	-0.322663	-1.46099	0.00380697	-	chr20:3813747-3814735	+	AP5S1	TCONS_00215924	4.41694	3.53175
ARAlincRNA_0348	XLOC_074987	5.27468	0.0932949	0.906664	1.00632	0.194813	-	chr20:5931297-6020699	+	TRMT6	TCONS_00216052	0.924866	1.73385
ARAlincRNA_0349	XLOC_076404	6.68701	0.013893	-0.45586	0.201051	0.902867	FPKM1_group_18887_transcript_3	chr20:16555096-16560288	-	KIF16B	TCONS_00220035;TCONS_00220034	0.841022	0.613168
ARAlincRNA_0350	XLOC_076469	4.32417	0.0724871	-1.00061	-0.194178	0.905736	LINC00652,linc-RBBP9-5	chr20:18768294-18776711	-	DTD1	TCONS_00220181;TCONS_00220179;TCONS_00220183;TCONS_00220182;TCONS_00220177;TCONS_00220178;TCONS_00220180	0.339355	0.169606
ARAlincRNA_0351	XLOC_076680	5.23428	0.0981076	1.85576	1.42942	0.354458	-	chr20:25161477-25162052	-	ENTPD6	TCONS_00220518	0.09081	0.32868
ARAlincRNA_0352	XLOC_075261	6.11044	0.0341042	0.128779	0.355216	0.776036	-	chr20:25850576-25853000	+	FAM182B,FPKM1_group_19046_transcript_1	TCONS_00216752	0.674586	0.737571
ARAlincRNA_0353	XLOC_077019	6.27053	0.0274242	0.603724	0.763542	0.68202	FPKM1_group_19143_transcript_1	chr20:35965950-35971849	-	SRC	TCONS_00221466	0.10231	0.155474
ARAlincRNA_0354	XLOC_077018	6.3922	0.0222178	0.0309458	-1.15917	0.276293	FPKM1_group_19143_transcript_1	chr20:35965950-35971849	-	SRC	TCONS_00221465	1.27934	1.30708
ARAlincRNA_0355	XLOC_075512	5.63081	0.0628309	-1.08328	-2.79786	0.0171971	-	chr20:40282534-40283340	+	CHD6	TCONS_00217617	0.506112	0.238862
ARAlincRNA_0356	XLOC_075513	6.42077	0.0212376	0.324918	-0.708313	0.703647	-	chr20:40283984-40284977	+	CHD6	TCONS_00217618	0.435689	0.545741
ARAlincRNA_0357	XLOC_077255	7.29555	0.00490046	0.412396	-0.346521	0.83887	-	chr20:42218624-42219253	-	IFT52	TCONS_00221868	1.37902	1.83533
ARAlincRNA_0358	XLOC_077325	6.67922	0.0144102	0.718975	0.517685	0.741282	STK4-AS1	chr20:43592434-43595043	-	STK4	TCONS_00221986;TCONS_00221987;TCONS_00221984;TCONS_00221985	0.241805	0.398014
ARAlincRNA_0359	XLOC_075595	6.43529	0.0214807	0.497414	0.989016	0.0921857	FPKM1_group_19317_transcript_1	chr20:44557744-44560154	+	PCIF1	TCONS_00217986	0.912311	1.28789
ARAlincRNA_0360	XLOC_077394	4.55279	0.0505928	0.985422	0.140828	0.921729	FPKM1_group_19327_transcript_2,ZNF663P	chr20:44994528-45088225	-	ZNF334	TCONS_00222222;TCONS_00222230;TCONS_00222228;TCONS_00222229	0.319419	0.632416
ARAlincRNA_0361	XLOC_077522	5.87231	0.0484834	0.139698	-1.2506	0.461132	-	chr20:48427708-48428357	-	SLC9A8	TCONS_00222488	0.450822	0.496659
ARAlincRNA_0362	XLOC_077549	5.5026	0.0726143	-2.55711	-1.13829	0.5614	-	chr20:48801445-48801936	-	CEBPB	TCONS_00222557	0.349199	0.0593343
ARAlincRNA_0363	XLOC_075775	6.07702	0.0355833	1.71596	1.94381	0.0162896	-	chr20:56290731-56291495	+	PMEPA1	TCONS_00218453	0.468169	1.53801
ARAlincRNA_0364	XLOC_075777	7.19399	0.00592047	0.702409	0.751226	0.0970117	-	chr20:56293846-56304137	+	PMEPA1	TCONS_00218458;TCONS_00218455;TCONS_00218456;TCONS_00218457	3.15324	5.13102
ARAlincRNA_0365	XLOC_077956	5.67134	0.0603973	3.91818	3.11767	1.52771e-05	FPKM1_group_19642_transcript_3,FPKM1_group_19643_transcript_1,TU_0072907_0	chr20:56325902-56338165	-	PMEPA1	TCONS_00223188;TCONS_00223184;TCONS_00223185;TCONS_00223186;TCONS_00223187	0.072196	1.09144
ARAlincRNA_0366	XLOC_078224	5.33304	0.0893594	-2.16504	-3.78221	0.000952161	-	chr20:61192272-61193024	-	SLCO4A1	TCONS_00223593	0.970431	0.216383
ARAlincRNA_0367	XLOC_075895	5.5942	0.0672366	0.535732	0.507405	0.543897	-	chr20:62155664-62157151	+	PPDPF	TCONS_00218974	1.35674	1.96683
ARAlincRNA_0368	XLOC_078357	6.21613	0.0286403	-0.13028	-0.33653	0.616107	-	chr21:9647828-9702545	+	BAGE2,TPTE	TCONS_00223873	6.94175	6.34236
ARAlincRNA_0369	XLOC_079044	6.35054	0.00115303	-0.687632	-0.71662	0.139161	-	chr21:9868190-9876753	-	BAGE2,TPTE	TCONS_00225872;TCONS_00225870;TCONS_00225871	3.37	2.09234
ARAlincRNA_0370	XLOC_078398	5.46338	0.0760666	0.536217	-1.43385	0.00531102	-	chr21:10195549-10196140	+	BAGE2,TPTE	TCONS_00223921	0.842803	1.2222
ARAlincRNA_0371	XLOC_078459	6.42975	0.0208825	-0.397869	-0.245783	0.877339	-	chr21:15103858-15105440	+	AL050303.1	TCONS_00223996	0.373748	0.283667
ARAlincRNA_0372	XLOC_078528	6.42088	0.0242188	-0.123449	0.151524	0.857173	FPKM1_group_19870_transcript_6	chr21:17442841-17999716	+	USP25	TCONS_00224132	7.33938	6.73748
ARAlincRNA_0373	XLOC_078529	5.42939	0.0807407	-0.0664625	-0.229071	0.828222	FPKM1_group_19870_transcript_3	chr21:17999833-18000559	+	CXADR	TCONS_00224133	6.10569	5.8308
ARAlincRNA_0374	XLOC_078548	4.9009	0.0132086	-1.88418	-2.2402	0.0979399	-	chr21:18985492-18986388	+	BTG3	TCONS_00224166	0.450161	0.121947
ARAlincRNA_0375	XLOC_079642	3.06769	0.0571873	0.214411	0.178616	0.854213	FPKM1_group_20042_transcript_2,RPL23P2	chr21:30367231-30372421	-	LTN1	TCONS_00226778;TCONS_00226779;TCONS_00226780;TCONS_00226777	1.94983	2.26225
ARAlincRNA_0376	XLOC_079726	4.41996	0.0752586	-1.01753	-1.25096	0.086231	FPKM1_group_20068_transcript_3	chr21:32996436-32998529	-	SOD1	TCONS_00226917	0.962163	0.475271
ARAlincRNA_0377	XLOC_079941	5.71718	0.0561614	-0.733354	-0.766163	0.58803	-	chr21:38934434-38935370	-	AP001421.1,DYRK1A	TCONS_00227492	0.82002	0.493245
ARAlincRNA_0378	XLOC_078815	3.74441	0.0913387	5.8601	4.88325	3.05835e-20	linc-UMODL1-5	chr21:42948061-42955551	+	TMPRSS2	TCONS_00225139;TCONS_00225138	0.0397621	2.30959
ARAlincRNA_0379	XLOC_078830	6.60681	0.0159691	-1.18743	-0.951891	0.600912	-	chr21:43477438-43478377	+	ZBTB21	TCONS_00225172	0.35501	0.155879
ARAlincRNA_0380	XLOC_080105	4.4735	0.0709771	-0.0709931	-0.00716156	0.995964	FPKM1_group_20194_transcript_1	chr21:44470171-44472649	-	CBS	TCONS_00227926;TCONS_00227925	2.78849	2.65459
ARAlincRNA_0381	XLOC_078892	6.18123	0.0302226	-0.899187	-1.93254	0.0179696	-	chr21:44851137-44852994	+	SIK1	TCONS_00225352	0.833555	0.446943
ARAlincRNA_0382	XLOC_078895	6.74916	0.0126378	-1.90508	-1.54262	0.0147459	-	chr21:44854769-44857406	+	SIK1	TCONS_00225356;TCONS_00225355	1.94694	0.519837
ARAlincRNA_0383	XLOC_078896	5.91653	0.0436413	-0.74157	-0.43834	0.784235	-	chr21:44857973-44858533	+	SIK1	TCONS_00225357	1.63445	0.977544
ARAlincRNA_0384	XLOC_080159	5.24221	0.0964875	0.205099	-0.418629	0.665788	AP001053.11,linc-CSTB-3	chr21:45209393-45232448	-	RRP1	TCONS_00228057;TCONS_00228056;TCONS_00228055;TCONS_00228054;TCONS_00228053;TCONS_00228068;TCONS_00228066;TCONS_00228067;TCONS_00228064;TCONS_00228065;TCONS_00228062;TCONS_00228063;TCONS_00228059;TCONS_00228058;TCONS_00228060;TCONS_00228061	1.39097	1.60346
ARAlincRNA_0385	XLOC_080170	4.34092	0.00747685	0.0709855	0.865771	0.152521	-	chr21:45551867-45553191	-	C21orf33	TCONS_00228080	1.07131	1.12534
ARAlincRNA_0386	XLOC_078955	6.22339	0.0290949	-0.828099	-0.571726	0.623992	-	chr21:45897343-45898565	+	C21orf90	TCONS_00225582	1.17834	0.663724
ARAlincRNA_0387	XLOC_078993	4.98745	0.0237272	-0.183158	-1.47925	0.097004	AL133493.2	chr21:47010840-47017218	+	SLC19A1	TCONS_00225685;TCONS_00225687;TCONS_00225686	1.176	1.03579
ARAlincRNA_0388	XLOC_080330	4.60427	0.00129907	-0.397091	-0.169038	0.838639	CECR7	chr22:17517459-17542465	+	IL17RA,linc-CECR2-3	TCONS_00228512;TCONS_00228513;TCONS_00228510;TCONS_00228511;TCONS_00228509;TCONS_00228508	8.1044	6.15439
ARAlincRNA_0389	XLOC_080397	6.19465	0.0296686	-0.449858	-0.356203	0.844172	-	chr22:19843258-19844125	+	C22orf29,GNB1L	TCONS_00228737	0.976063	0.71459
ARAlincRNA_0390	XLOC_081695	5.65986	0.0603645	-0.411097	-0.584856	0.794353	-	chr22:24128756-24129093	-	SMARCB1	TCONS_00233142	1.21105	0.910774
ARAlincRNA_0391	XLOC_080636	5.43077	0.0819673	-0.134233	0.2913	0.807826	KB-226F1.2	chr22:24269086-24326106	+	AP000351.3,DDT	TCONS_00229491;TCONS_00229492	1.10962	1.01104
ARAlincRNA_0392	XLOC_081760	4.37816	0.0789988	-0.0471664	-0.468743	0.605517	FPKM1_group_20355_transcript_3	chr22:25642470-25916821	-	ADRBK2,linc-ADRBK2-1	TCONS_00233332	1.04949	1.01574
ARAlincRNA_0393	XLOC_081803	4.60795	0.0157118	-0.0639329	0.23553	0.883127	CTA-445C9.15	chr22:26917948-26921002	-	TFIP11	TCONS_00233486	0.219668	0.210146
ARAlincRNA_0394	XLOC_080826	5.92301	0.0432809	1.0911	1.39036	0.171799	-	chr22:32684274-32685431	+	SLC5A4	TCONS_00230407	0.198326	0.422506
ARAlincRNA_0395	XLOC_082135	5.26306	0.0958522	-0.321147	0.0677901		FPKM1_group_20499_transcript_1	chr22:35628634-35628913	-	ISX	TCONS_00234361	0.124095	0.0993295
ARAlincRNA_0396	XLOC_082326	6.67401	0.0143596	-0.236226	-0.150443	0.932818	-	chr22:39914376-39915242	-	ATF4	TCONS_00235086	0.96179	0.816524
ARAlincRNA_0397	XLOC_081139	5.98698	0.0396976	3.37825	3.85276	1.90451e-24	-	chr22:46377756-46382694	+	CR536603.1,WNT7B	TCONS_00231676	0.0978281	1.01723
ARAlincRNA_0398	XLOC_081153	3.56978	0.0761497	-0.146243	-0.0652884	0.978327	-	chr22:46416670-46418341	+	FLJ27365,MIR4763,MIRLET7A3,MIRLET7B,RP6-109B7.3	TCONS_00231690	0.464148	0.419405
ARAlincRNA_0399	XLOC_082576	4.21685	0.0865914	nan	1.34927		FPKM1_group_20633_transcript_1	chr22:46648257-46649330	-	CDPF1	TCONS_00235740	0.445723	0
ARAlincRNA_0400	XLOC_086219	5.93154	0.0434168	0.256263	0.180124	0.931377	-	chr3:14443105-14443771	-	SLC6A6	TCONS_00247143	1.05005	1.25416
ARAlincRNA_0401	XLOC_082994	5.59739	0.0675977	0.469909	0.78544	0.096205	-	chr3:15901623-15984307	+	ANKRD28	TCONS_00237190	1.80771	2.50372
ARAlincRNA_0402	XLOC_086421	5.58902	0.0666928	-1.22016	-0.105563		FPKM1_group_20967_transcript_1,UBE2E1-AS1	chr3:23845514-23932811	-	NR1D2	TCONS_00247661;TCONS_00247660	0.10484	0.0450007
ARAlincRNA_0403	XLOC_086487	5.18371	0.0168249	-0.257676	-0.271561	0.706324	AC092415.1,FPKM1_group_20994_transcript_1,FPKM1_group_21000_transcript_1	chr3:27975777-28101168	-	CMC1	TCONS_00247876;TCONS_00247932;TCONS_00247875;TCONS_00247915;TCONS_00247886;TCONS_00247916;TCONS_00247893;TCONS_00247894;TCONS_00247914	16.3859	13.7058
ARAlincRNA_0404	XLOC_086699	6.2472	0.0276323	inf	2.82956	0.0340968	FPKM1_group_21073_transcript_2	chr3:37282250-37282808	-	GOLGA4	TCONS_00248306	0	0.230084
ARAlincRNA_0405	XLOC_083328	5.84931	0.0475209	1.75056	0.383844	0.886925	-	chr3:38179028-38179544	+	ACAA1,Y_RNA	TCONS_00238101	0.197849	0.66574
ARAlincRNA_0406	XLOC_083366	5.51165	0.0723165	-1.60517	-0.39317	0.847711	linc-SLC25A38	chr3:39418963-39422626	+	SLC25A38	TCONS_00238254	0.606252	0.199273
ARAlincRNA_0407	XLOC_083389	3.84788	0.0236409	-0.0524376	0.0289797	0.98474	RP11-391M1.4	chr3:40504133-40510294	+	RPL14	TCONS_00238350;TCONS_00238349	1.44596	1.39434
ARAlincRNA_0408	XLOC_086824	5.28447	0.0925227	-0.939499	-1.07344	0.170018	-	chr3:40565218-40566334	-	ZNF621	TCONS_00248565	1.8398	0.959296
ARAlincRNA_0409	XLOC_086846	6.17899	0.0300571	-0.378704	-0.126239	0.964502	FPKM1_group_21124_transcript_1	chr3:42053693-42054984	-	TRAK1,linc-TRAK1	TCONS_00248607	0.197083	0.151582
ARAlincRNA_0410	XLOC_086917	6.1702	0.00204167	-0.288858	0.0537966	0.961325	-	chr3:44532843-44538259	-	ZNF852	TCONS_00248829	2.58979	2.11987
ARAlincRNA_0411	XLOC_087079	4.44451	0.0603159	-0.205165	-0.168668	0.914842	RP11-572O6.1	chr3:48701208-48723797	-	NCKIPSD	TCONS_00249450	0.717395	0.622296
ARAlincRNA_0412	XLOC_087123	5.91163	0.00357297	0.0118902	-0.932402	0.321038	BSN-AS2,linc-NICN1-2	chr3:49586738-49591799	-	DAG1	TCONS_00249791;TCONS_00249790;TCONS_00249793;TCONS_00249792	0.476834	0.48078
ARAlincRNA_0413	XLOC_083570	3.00298	0.0989931	-0.280088	-0.193177	0.814691	SEMA3B,U73166.2,linc-SEMA3B	chr3:50297734-50314977	+	GNAI2	TCONS_00239316;TCONS_00239327;TCONS_00239326;TCONS_00239325;TCONS_00239324;TCONS_00239323;TCONS_00239322;TCONS_00239321;TCONS_00239320;TCONS_00239314;TCONS_00239329;TCONS_00239328;TCONS_00239317;TCONS_00239315;TCONS_00239335;TCONS_00239318;TCONS_00239319;TCONS_00239330;TCONS_00239331;TCONS_00239332;TCONS_00239333;TCONS_00239334;TCONS_00239313;TCONS_00239336;TCONS_00239337	27.9763	23.0396
ARAlincRNA_0414	XLOC_087190	5.84948	0.0517332	1.11476	-0.978496	0.382354	FPKM1_group_21221_transcript_1	chr3:51807573-51808305	-	RRP9	TCONS_00250141	1.40228	3.03677
ARAlincRNA_0415	XLOC_087280	5.75357	0.0542593	-0.291307	-0.633413	0.733612	-	chr3:57260798-57261557	-	APPL1	TCONS_00250628	0.49486	0.40438
ARAlincRNA_0416	XLOC_087818	5.39245	0.08245	-3.63231	-2.36596	0.000223433	FPKM1_group_21478_transcript_8	chr3:75673836-75697399	-	FRG2C	TCONS_00251716	1.32003	0.106451
ARAlincRNA_0417	XLOC_087878	5.04815	0.0215349	-1.25189	-1.03239	0.491937	FPKM1_group_21498_transcript_1	chr3:80651692-80652696	-	ROBO1	TCONS_00251807	0.3895	0.16355
ARAlincRNA_0418	XLOC_084204	5.77723	0.0525565	0.590921	0.136693	0.959146	-	chr3:101419320-101419767	+	RPL24	TCONS_00241011	0.755295	1.13763
ARAlincRNA_0419	XLOC_088878	7.01458	0.00792055	-1.80319	-1.62611	0.00268331	FPKM1_group_21934_transcript_1,RP11-666A20.4	chr3:125546080-125629988	-	ALG1L	TCONS_00253989;TCONS_00253988;TCONS_00253991	3.20056	0.917091
ARAlincRNA_0420	XLOC_084661	6.80501	0.0114367	0.301005	0.0720467	0.955803	-	chr3:128538821-128544729	+	ACAD9	TCONS_00242304	2.82955	3.48601
ARAlincRNA_0421	XLOC_084871	5.46844	0.0792923	-0.50368	-0.831183	0.318557	RP11-340E6.1	chr3:141381922-141448172	+	RNF7	TCONS_00243137;TCONS_00243136	0.843192	0.594708
ARAlincRNA_0422	XLOC_085001	6.59331	0.0161134	-0.472364	-1.16795	0.129916	FPKM1_group_22179_transcript_1	chr3:149959347-149964620	+	ANKUB1,PFN2,RNU6-507P,linc-PFN2-1	TCONS_00243515	1.22043	0.879662
ARAlincRNA_0423	XLOC_089530	5.95793	0.00132519	-0.0285652	-0.575666	0.559105	FPKM1_group_22178_transcript_1,FPKM1_group_22178_transcript_3,FPKM1_group_22178_transcript_4	chr3:149959347-149964620	-	ANKUB1,PFN2,RNU6-507P,linc-PFN2-1	TCONS_00255684;TCONS_00255682;TCONS_00255683;TCONS_00255681	2.32785	2.28221
ARAlincRNA_0424	XLOC_089532	6.13089	0.0322947	0.0469785	-0.618195	0.766198	FPKM1_group_22179_transcript_3	chr3:149964823-149965857	-	ANKUB1,PFN2,RNU6-507P,linc-PFN2-1	TCONS_00255688	0.238944	0.246852
ARAlincRNA_0425	XLOC_085055	3.98689	0.056309	-0.923065	-0.611715	0.426536	FPKM1_group_22244_transcript_5	chr3:153742189-153975616	+	DHX36	TCONS_00243713	0.838562	0.442247
ARAlincRNA_0426	XLOC_089704	7.4438	0.00355377	-1.13582	-1.21748	0.0335838	-	chr3:154441702-154475824	-	MME	TCONS_00255967	1.09073	0.496365
ARAlincRNA_0427	XLOC_085130	4.27045	0.079999	0.736715	0.785706	0.457908	FPKM1_group_22280_transcript_2	chr3:158547928-158551134	+	RARRES1	TCONS_00243996	0.478706	0.797705
ARAlincRNA_0428	XLOC_090259	6.10415	0.0346374	-1.96994	-2.29457	0.0164362	FPKM1_group_22452_transcript_1,RP11-71G7.1,linc-SPATA16-1	chr3:176321928-176354567	-	FPKM1_group_22460_transcript_7,TBL1XR1	TCONS_00257105;TCONS_00257104;TCONS_00257103;TCONS_00257102;TCONS_00257101;TCONS_00257100	0.789819	0.201612
ARAlincRNA_0429	XLOC_090340	3.90225	0.0587937	-3.74224	-3.52026	0.000470877	FPKM1_group_22491_transcript_2	chr3:177470464-177474723	-	FPKM1_group_22460_transcript_7,TBL1XR1	TCONS_00257217	0.117228	0.00876004
ARAlincRNA_0430	XLOC_085520	5.56423	0.0681338	-0.116891	0.203183	0.891741	RP11-255C15.4	chr3:179055909-179056371	+	MFN1	TCONS_00244775	2.20994	2.03795
ARAlincRNA_0431	XLOC_085757	6.81621	0.0114295	0.19298	-0.515278	0.724792	LINC00885,linc-OSTalpha-1	chr3:195869506-195887761	+	TFRC	TCONS_00246059;TCONS_00246062;TCONS_00246063;TCONS_00246060;TCONS_00246061;TCONS_00246066;TCONS_00246067;TCONS_00246064;TCONS_00246065	0.47267	0.540319
ARAlincRNA_0432	XLOC_090957	4.97743	0.00836685	1.34823	0.728598	0.436079	RP13-616I3.1	chr3:197232132-197233857	-	BDH1	TCONS_00258757;TCONS_00258756	1.33582	3.401
ARAlincRNA_0433	XLOC_090970	3.42852	0.0873069	-0.33509	-0.201887	0.896901	FPKM1_group_22750_transcript_1	chr3:197395659-197396963	-	FYTTD1	TCONS_00258813	0.509626	0.403998
ARAlincRNA_0434	XLOC_090994	3.50061	0.0537936	0.128051	0.605155	0.238384	ZNF718	chr4:123965-159110	+	Z95704.2,ZNF595	TCONS_00258902;TCONS_00258900;TCONS_00258901;TCONS_00258894;TCONS_00258895;TCONS_00258896;TCONS_00258897;TCONS_00258891;TCONS_00258892;TCONS_00258893	5.75834	6.29281
ARAlincRNA_0435	XLOC_093432	6.92799	0.00909474	0.511079	0.490748	0.656435	FPKM1_group_22762_transcript_1	chr4:685839-686102	-	ATP5I	TCONS_00265735	5.47494	7.80243
ARAlincRNA_0436	XLOC_091034	6.23537	0.0278646	1.12043	0.775372	0.467161	-	chr4:686351-686745	+	ATP5I	TCONS_00259021	1.63131	3.54665
ARAlincRNA_0437	XLOC_091045	5.14235	0.00576957	0.117937	-0.0400566	0.971836	linc-FGFRL1	chr4:1000613-1002952	+	DGKQ	TCONS_00259101	7.38122	8.00997
ARAlincRNA_0438	XLOC_093463	5.98949	0.0395693	0.914823	1.01886	0.0726165	-	chr4:1155715-1157027	-	SPON2	TCONS_00265838	1.72321	3.24883
ARAlincRNA_0439	XLOC_091055	6.91508	0.00939744	2.40264	0.778952	0.296939	-	chr4:1157283-1157694	+	SPON2	TCONS_00259124	0.180169	0.952678
ARAlincRNA_0440	XLOC_093504	6.93211	0.00963152	-0.706504	-0.343025	0.747137	FPKM1_group_22784_transcript_1,RN7SL671P	chr4:1867037-1872110	-	WHSC1	TCONS_00265983;TCONS_00265984;TCONS_00265985	3.51523	2.15415
ARAlincRNA_0441	XLOC_093539	4.80595	0.0364605	-0.651682	-0.720474	0.292641	-	chr4:3291317-3292779	-	RGS12	TCONS_00266116	2.1521	1.36989
ARAlincRNA_0442	XLOC_091143	4.68765	0.043488	-0.524702	-0.61909	0.479249	-	chr4:4731509-4734183	+	STX18	TCONS_00259598	0.702634	0.488403
ARAlincRNA_0443	XLOC_091159	5.44629	0.0799007	-1.62254	-1.7185	0.0115972	linc-MSX1-1	chr4:4763531-4789101	+	STX18	TCONS_00259614	0.493497	0.160269
ARAlincRNA_0444	XLOC_093666	5.56895	0.00185451	0.920235	1.13597	0.00493744	RP11-774O3.3	chr4:8356816-8360065	-	TRMT44	TCONS_00266394	2.77567	5.25274
ARAlincRNA_0445	XLOC_091379	5.79901	0.0507781	-1.74899	-1.95117	0.193124	-	chr4:10460615-10461025	+	ZNF518B	TCONS_00259999	0.975788	0.290307
ARAlincRNA_0446	XLOC_091487	6.19656	0.030735	0.50364	0.202601	0.885761	FPKM1_group_23053_transcript_3,RP11-552M14.1	chr4:23106781-23125110	+	GPR125,linc-KCNIP4-2	TCONS_00260346;TCONS_00260345;TCONS_00260344	0.948769	1.34515
ARAlincRNA_0447	XLOC_091661	6.79166	0.0126013	0.37289	-0.384246	0.800337	RP11-539G18.2	chr4:39654823-39668264	+	UGDH	TCONS_00260800;TCONS_00260801	0.711171	0.920926
ARAlincRNA_0448	XLOC_091721	2.86104	0.0586586	0.753616	1.02813	0.0240923	-	chr4:42100375-42101540	+	BEND4	TCONS_00261003	2.4485	4.1282
ARAlincRNA_0449	XLOC_091735	6.05657	0.035909	0.936476	1.42592	0.320596	linc-SHISA3	chr4:42236243-42253256	+	BEND4	TCONS_00261018;TCONS_00261017	0.202398	0.387359
ARAlincRNA_0450	XLOC_091781	6.8084	0.0114295	-1.10513	-0.432114	0.74351	-	chr4:48296155-48297957	+	TEC	TCONS_00261110	0.452491	0.210345
ARAlincRNA_0451	XLOC_094718	5.24221	0.0964875	1.12781	1.08014	0.516337	-	chr4:48342242-48342836	-	SLAIN2	TCONS_00268246	0.252109	0.550926
ARAlincRNA_0452	XLOC_092071	4.4489	0.0646788	-1.68223	-0.254312	0.767334	FPKM1_group_23423_transcript_1,RP11-19C24.1,RP11-25H12.1,linc-STAP1-2	chr4:66864563-67015730	+	CENPC	TCONS_00261728;TCONS_00261729;TCONS_00261726;TCONS_00261727;TCONS_00261725;TCONS_00261730	4.05211	1.26264
ARAlincRNA_0453	XLOC_092727	4.32121	0.0722015	-1.40338	-0.951571	0.453376	-	chr4:123633699-123634424	+	NUDT6	TCONS_00263707	0.90828	0.343369
ARAlincRNA_0454	XLOC_096615	5.18828	0.0168992	0.130592	-0.134586	0.891365	FPKM1_group_24094_transcript_1,RP11-519M16.1	chr4:130645325-130876523	-	SCLT1	TCONS_00272269;TCONS_00272268;TCONS_00272270;TCONS_00272271;TCONS_00272272;TCONS_00272273;TCONS_00272274	4.95246	5.42167
ARAlincRNA_0455	XLOC_092935	5.35255	0.0861463	1.0636	0.490076	0.788898	-	chr4:147444081-147444494	+	SLC10A7	TCONS_00264252	0.944945	1.97507
ARAlincRNA_0456	XLOC_097115	6.67285	0.014384	0.570425	0.612406	0.629662	-	chr4:153855746-153856551	-	FHDC1	TCONS_00273249	0.64956	0.964571
ARAlincRNA_0457	XLOC_093027	8.46	0.000334488	0.682035	1.31709	0.0195218	FPKM1_group_24346_transcript_1,linc-GUCY1A3-2	chr4:156363956-156369849	+	MAP9	TCONS_00264563;TCONS_00264562;TCONS_00264561;TCONS_00264560;TCONS_00264558;TCONS_00264559	0.587687	0.942886
ARAlincRNA_0458	XLOC_093171	6.78624	0.0127078	1.74092	1.65972	0.142026	-	chr4:171012897-171013807	+	AADAT	TCONS_00265000	0.234543	0.783957
ARAlincRNA_0459	XLOC_093291	5.95714	0.00300669	-1.20243	-0.75149	0.275405	RP11-326I11.3,linc-CCDC111-2	chr4:185395861-185407002	+	IRF2	TCONS_00265340;TCONS_00265339	1.32935	0.577662
ARAlincRNA_0460	XLOC_097778	5.28732	0.0924832	0.450423	-0.150316	0.953489	-	chr4:186072289-186073071	-	LRP2BP	TCONS_00274596	0.473002	0.646329
ARAlincRNA_0461	XLOC_093366	6.85824	0.0104911	0.387105	0.877218	0.310974	-	chr4:190285988-190286993	+	FRG1	TCONS_00265586	0.802221	1.04912
ARAlincRNA_0462	XLOC_098035	3.98687	0.0220535	-0.77464	-1.17767	0.0218599	FPKM1_group_24745_transcript_1,FPKM1_group_24745_transcript_2,FPKM1_group_24747_transcript_1	chr4:190626381-190643493	-	FRG1	TCONS_00275065;TCONS_00275066;TCONS_00275067;TCONS_00275075;TCONS_00275068;TCONS_00275069;TCONS_00275070;TCONS_00275071	1.54944	0.905704
ARAlincRNA_0463	XLOC_100704	4.79166	0.0168929	0.29357	0.479741	0.376725	linc-ZDHHC11	chr5:710470-919472	-	NKD2	TCONS_00283155;TCONS_00283154;TCONS_00283156	5.9371	7.27693
ARAlincRNA_0464	XLOC_100877	6.64927	0.0158112	-1.87267	-1.01666	0.420922	FPKM1_group_24864_transcript_3	chr5:6779054-6781109	-	PAPD7	TCONS_00283508	0.220459	0.0602004
ARAlincRNA_0465	XLOC_098544	6.24246	0.0287089	-0.636661	-0.86327	0.699845	-	chr5:34589019-34590699	+	RAI14	TCONS_00276200	0.432901	0.278442
ARAlincRNA_0466	XLOC_102528	7.86413	0.00140442	-0.0516245	0.49953	0.410319	linc-CD180-13	chr5:68477524-68484948	-	CENPH	TCONS_00286473	2.75583	2.65896
ARAlincRNA_0467	XLOC_098909	5.83627	0.0490328	-1.10095	-0.710629	0.514072	-	chr5:70167566-70169804	+	SMN1	TCONS_00277509	0.496059	0.231267
ARAlincRNA_0468	XLOC_098950	5.67766	0.00234461	-0.293093	-0.286102	0.703534	CTC-365E16.1	chr5:71656221-71660293	+	MRPS27	TCONS_00277640;TCONS_00277639	2.22396	1.81508
ARAlincRNA_0469	XLOC_099196	5.96271	0.0409615	-0.731653	-0.4063	0.635796	CTC-480C2.1,FPKM1_group_25751_transcript_1	chr5:84959049-84963566	+	COX7C,MIR3607	TCONS_00278338;TCONS_00278337;TCONS_00278336	1.40834	0.848122
ARAlincRNA_0470	XLOC_103166	3.75919	0.0757283	-0.551828	-0.678598	0.24601	FPKM1_group_25820_transcript_1	chr5:87484729-87794514	-	CCNH	TCONS_00287637	3.10536	2.11834
ARAlincRNA_0471	XLOC_099433	5.48915	0.074029	-0.00689421	-0.298424	0.786696	FPKM1_group_26068_transcript_1,RP11-138J23.1	chr5:103415611-103443780	+	NUDT12	TCONS_00278980;TCONS_00278975;TCONS_00278977;TCONS_00278976	2.21511	2.20455
ARAlincRNA_0472	XLOC_099692	5.42581	0.0793001	-1.16123	-2.08118	0.0593474	FPKM1_group_26232_transcript_3	chr5:122166841-122170664	+	SNX24	TCONS_00279598;TCONS_00279597	0.210978	0.0943348
ARAlincRNA_0473	XLOC_099731	5.51926	0.0715013	-0.366001	-0.624139	0.65562	-	chr5:126366593-126367597	+	MARCH3	TCONS_00279732	1.14221	0.886277
ARAlincRNA_0474	XLOC_099910	5.87172	0.0466022	1.46583	1.17251	0.0167229	-	chr5:138725774-138727099	+	MZB1	TCONS_00280465	2.16801	5.9885
ARAlincRNA_0475	XLOC_099998	4.29113	0.0868767	-0.07298	-0.63355	0.519376	AC005618.6	chr5:140705776-140708924	+	PCDHGA1,PCDHGA10,PCDHGA11,PCDHGA12,PCDHGA2,PCDHGA3,PCDHGA4,PCDHGA5,PCDHGA6,PCDHGA7,PCDHGA8,PCDHGA9,PCDHGB1,PCDHGB2,PCDHGB3,PCDHGB4,PCDHGB6,PCDHGB7,PCDHGC3,PCDHGC4,PCDHGC5	TCONS_00280781;TCONS_00280783;TCONS_00280782	0.534381	0.508021
ARAlincRNA_0476	XLOC_104975	6.46266	0.0200237	-2.03132	-0.874443		CTC-248O19.1,FPKM1_group_26603_transcript_1	chr5:156687131-157002783	-	THG1L	TCONS_00291639;TCONS_00291638	0.124602	0.0304815
ARAlincRNA_0477	XLOC_105272	5.30271	0.0913053	0.573479	-1.95117	0.193124	FPKM1_group_26770_transcript_4,RP11-779O18.2	chr5:172185228-172209337	-	ERGIC1	TCONS_00292211;TCONS_00292212;TCONS_00292213	0.270208	0.402099
ARAlincRNA_0478	XLOC_100509	4.01762	0.0791931	-2.10961	-0.823882	0.599977	RP11-267A15.1	chr5:173763095-173962740	+	MSX2	TCONS_00282399;TCONS_00282394;TCONS_00282395;TCONS_00282396;TCONS_00282397;TCONS_00282390;TCONS_00282391;TCONS_00282392;TCONS_00282393	0.393576	0.0911952
ARAlincRNA_0479	XLOC_100591	6.48837	0.0194345	0.23271	0.138092	0.945842	-	chr5:177659919-177660927	+	PHYKPL	TCONS_00282804	0.856561	1.00649
ARAlincRNA_0480	XLOC_100593	6.00349	0.0414047	-0.0346802	0.114769	0.955578	linc-ZNF354B-1	chr5:177662178-177664575	+	PHYKPL	TCONS_00282806;TCONS_00282807	0.497482	0.485666
ARAlincRNA_0481	XLOC_105669	5.55654	0.0701548	-1.275	-0.91711	0.202777	-	chr6:1261583-1262886	+	EXOC2	TCONS_00293439	1.925	0.795456
ARAlincRNA_0482	XLOC_108279	7.03666	0.00747685	0.418374	-0.136398	0.91955	FPKM1_group_27050_transcript_2	chr6:8435890-8609623	-	SLC35B3	TCONS_00300837	0.565943	0.756339
ARAlincRNA_0483	XLOC_108381	7.16477	0.00592047	0.939777	-0.266664	0.879188	RP11-421M1.8	chr6:10741717-10747896	-	MAK	TCONS_00301023;TCONS_00301025	1.26762	2.43158
ARAlincRNA_0484	XLOC_108709	6.11801	0.0330974	-0.413188	0.261403	0.918064	-	chr6:20401027-20401710	-	E2F3	TCONS_00301543	0.456762	0.343011
ARAlincRNA_0485	XLOC_106114	4.23461	0.00563795	-8.55946	0.130962	0.915317	FPKM1_group_27390_transcript_3,LINC00240,TRNAI2	chr6:26924770-26991804	+	HIST1H2BJ	TCONS_00294570;TCONS_00294568;TCONS_00294569;TCONS_00294573;TCONS_00294572;TCONS_00294571;TCONS_00294567;TCONS_00294566	277.663	0.735979
ARAlincRNA_0486	XLOC_106149	6.14349	0.0322947	0.0328143	0.543274	0.831095	linc-HIST1H2AI-2	chr6:27677988-27680876	+	HIST1H2BL	TCONS_00294650	0.349516	0.357557
ARAlincRNA_0487	XLOC_106283	4.88371	0.0330974	-0.303243	-0.48942	0.488592	HLA-L,linc-TRIM39-1	chr6:30201815-30314661	+	TRIM26	TCONS_00294977;TCONS_00294976;TCONS_00294979;TCONS_00294980;TCONS_00294984;TCONS_00294978	9.34263	7.57154
ARAlincRNA_0488	XLOC_106598	4.56282	0.0527625	0.543107	-0.754077	0.580309	FPKM1_group_27574_transcript_1,linc-UBR2-1,linc-UBR2-2	chr6:42420212-42424836	+	TRERF1	TCONS_00296427;TCONS_00296430;TCONS_00296431;TCONS_00296429;TCONS_00296428	0.501528	0.73078
ARAlincRNA_0489	XLOC_109659	5.46993	0.0755382	0.433571	0.315713	0.871424	-	chr6:42947221-42948091	-	PEX6	TCONS_00304086	0.436413	0.589407
ARAlincRNA_0490	XLOC_106741	5.56101	0.00301998	-0.609427	-0.606448	0.321392	RP1-152L7.5,linc-TMEM14A-1	chr6:52529198-52533953	+	TMEM14A	TCONS_00296958;TCONS_00296957;TCONS_00296956;TCONS_00296955;TCONS_00296954	3.40137	2.22945
ARAlincRNA_0491	XLOC_109915	5.05775	0.0222473	-0.386175	-0.745817	0.284302	FPKM1_group_27665_transcript_1,FPKM1_group_27665_transcript_2,RP11-79N23.1,RP13-476E20.1,linc-KLHL31-1	chr6:53605546-53659072	-	LRRC1	TCONS_00304684;TCONS_00304685;TCONS_00304686;TCONS_00304678;TCONS_00304679;TCONS_00304683;TCONS_00304682;TCONS_00304681;TCONS_00304680;TCONS_00304677	1.4137	1.0817
ARAlincRNA_0492	XLOC_106909	3.0914	0.0799007	-0.709281	-0.751861	0.621127	RP1-234P15.4	chr6:75994729-76203454	+	TMEM30A	TCONS_00297411;TCONS_00297410;TCONS_00297409	0.795953	0.486825
ARAlincRNA_0493	XLOC_110227	5.65451	0.0612371	-0.374289	0.117919	0.954706	-	chr6:76457275-76458472	-	MYO6	TCONS_00305341	0.483364	0.372909
ARAlincRNA_0494	XLOC_106930	2.999	0.0649266	1.1574	1.31748	0.00495657	FPKM1_group_27820_transcript_1	chr6:77484699-77698599	+	IMPG1	TCONS_00297472	0.154696	0.345056
ARAlincRNA_0495	XLOC_110272	5.505	0.0724871	0.0227601	0.0475549	0.979797	FPKM1_group_27820_transcript_1	chr6:77484699-77698599	-	IMPG1	TCONS_00305391	1.58949	1.61476
ARAlincRNA_0496	XLOC_106940	5.83041	0.0529451	0.480716	-2.54342	0.0681057	-	chr6:79789915-79790237	+	PHIP	TCONS_00297487	1.03182	1.43984
ARAlincRNA_0497	XLOC_110362	7.38656	0.00381178	-1.02718	-2.74727	0.000245454	-	chr6:80017718-80023010	-	HMGN3	TCONS_00305497;TCONS_00305498	0.917112	0.449999
ARAlincRNA_0498	XLOC_106968	6.84154	0.0107326	0.584993	0.644687	0.658671	RP11-250B2.6	chr6:81065140-81066576	+	BCKDHB	TCONS_00297546	0.199241	0.298868
ARAlincRNA_0499	XLOC_110917	4.89353	0.033502	-0.794438	-0.6463	0.698946	FPKM1_group_28165_transcript_1	chr6:109156230-109158325	-	ARMC2	TCONS_00306592	0.231527	0.133491
ARAlincRNA_0500	XLOC_107251	6.26555	0.0273795	0.0239572	0.448482	0.67173	-	chr6:111243303-111244285	+	GTF3C6	TCONS_00298244	1.1876	1.20748
ARAlincRNA_0501	XLOC_107275	5.91766	0.0460109	2.17047	1.56503	0.292659	-	chr6:111298007-111298355	+	RPF2	TCONS_00298269	0.262698	1.18259
ARAlincRNA_0502	XLOC_111302	6.1145	0.0343456	nan	-0.550469		FPKM1_group_28330_transcript_1,FPKM1_group_28330_transcript_2	chr6:123048677-123049742	-	SMPDL3A	TCONS_00307424;TCONS_00307423	0.155624	0
ARAlincRNA_0503	XLOC_111635	5.75022	0.0584403	0.0856768	-0.522146	0.814231	FPKM1_group_28508_transcript_1	chr6:135604669-136037193	-	MTFR2	TCONS_00308181	0.139443	0.147975
ARAlincRNA_0504	XLOC_111721	4.32591	0.0540447	-1.17375	0.143766	0.94972	RP11-356I2.4,linc-OLIG3-1	chr6:138143934-138204449	-	TNFAIP3	TCONS_00308364;TCONS_00308365;TCONS_00308360;TCONS_00308361;TCONS_00308362;TCONS_00308363;TCONS_00308355;TCONS_00308357;TCONS_00308356	0.185414	0.0821878
ARAlincRNA_0505	XLOC_111746	7.21203	0.00546372	-1.01997	-0.667643	0.341611	-	chr6:138480031-138482736	-	KIAA1244	TCONS_00308388	0.950673	0.468802
ARAlincRNA_0506	XLOC_111758	5.41948	0.0799379	-0.353262	-0.943669	0.1459	-	chr6:139048500-139052147	-	NHSL1	TCONS_00308409	1.62628	1.27307
ARAlincRNA_0507	XLOC_111942	7.46129	0.00349258	-4.70517	-2.07717	0.0786053	RP11-440G9.1,linc-NMBR-1	chr6:142847591-142959026	-	HIVEP2	TCONS_00308676;TCONS_00308674;TCONS_00308675;TCONS_00308673	0.459089	0.0175994
ARAlincRNA_0508	XLOC_107668	6.73792	0.0131187	0.480344	0.766799	0.476337	RP11-361F15.2	chr6:147708799-147711601	+	STXBP5	TCONS_00299430	0.253566	0.353744
ARAlincRNA_0509	XLOC_107891	6.24906	0.0283705	-0.376818	-1.22798		-	chr6:160740974-160741272	+	SLC22A3	TCONS_00299987	0.827452	0.637249
ARAlincRNA_0510	XLOC_107892	5.32665	0.0909405	-1.05935	-0.877037	0.546773	-	chr6:160742241-160742753	+	SLC22A3	TCONS_00299988	1.14765	0.550698
ARAlincRNA_0511	XLOC_112419	5.71221	0.056398	-2.9488	-0.487632	0.83217	FPKM1_group_28839_transcript_5,linc-PARK2-4	chr6:165205862-165314323	-	PDE10A	TCONS_00309572;TCONS_00309569;TCONS_00309568;TCONS_00309570;TCONS_00309571	0.186216	0.0241179
ARAlincRNA_0512	XLOC_112565	5.4322	0.0110462	-1.57705	0.177568	0.888314	FPKM1_group_28915_transcript_1,FPKM1_group_28915_transcript_2	chr6:168154382-168156869	-	MLLT4	TCONS_00309823;TCONS_00309824	1.29499	0.434036
ARAlincRNA_0513	XLOC_112666	5.42701	0.00185744	0.0340833	-0.857203	0.326142	AC093627.10,linc-FAM20C-2	chr7:149596-155465	+	PDGFA	TCONS_00310066;TCONS_00310067;TCONS_00310065;TCONS_00310071;TCONS_00310070;TCONS_00310073;TCONS_00310072;TCONS_00310068;TCONS_00310069	1.30976	1.34107
ARAlincRNA_0514	XLOC_112760	7.02349	0.00808483	-0.653828	-0.745884	0.29421	RP11-1275H24.3	chr7:5465400-5470729	+	TNRC18	TCONS_00310466;TCONS_00310465	3.00293	1.90864
ARAlincRNA_0515	XLOC_115055	5.24443	0.0965606	0.158403	0.377278	0.70397	AC092171.4	chr7:5470965-5553429	-	AC006483.1,ACTB	TCONS_00318270	4.13063	4.60999
ARAlincRNA_0516	XLOC_112824	5.59749	0.0653317	-0.616467	-0.564279	0.461468	-	chr7:8396412-8398629	+	ICA1	TCONS_00310703	1.12832	0.735965
ARAlincRNA_0517	XLOC_112941	6.02599	0.0379312	0.873993	0.897194	0.341034	-	chr7:19157602-19161539	+	TWIST1,linc-PRPS1L1	TCONS_00310971	0.701396	1.28547
ARAlincRNA_0518	XLOC_113237	4.54555	0.0375377	0.178553	0.331097	0.672612	-	chr7:44615525-44616900	+	DDX56	TCONS_00312112	0.793867	0.898458
ARAlincRNA_0519	XLOC_113560	5.35255	0.0861463	-0.184682	-0.00189769	0.99891	-	chr7:66358635-66362467	+	TMEM248	TCONS_00312885	1.62537	1.43007
ARAlincRNA_0520	XLOC_113566	8.31107	0.000464003	-0.115349	-0.140728	0.887133	RP11-458F8.4	chr7:66367843-66371284	+	TMEM248	TCONS_00312891	7.26466	6.70644
ARAlincRNA_0521	XLOC_113725	6.38986	0.0222178	-1.80448	-2.01572	0.123324	-	chr7:75931165-75931662	+	HSPB1	TCONS_00313449	0.752459	0.215416
ARAlincRNA_0522	XLOC_117053	5.71532	0.05643	-0.67259	-0.429664	0.743102	-	chr7:76139048-76139438	-	AC004980.9,CCDC146,DTX2P1,DTX2P1-UPK3BP1-PMS2P11,PMS2P11,PMS2P9,RP11-467H10.2,UPK3B,UPK3BP1	TCONS_00322505	3.68503	2.31191
ARAlincRNA_0523	XLOC_117161	4.35687	0.0302644	-0.397804	-0.307824	0.802578	FPKM1_group_29949_transcript_1	chr7:86953597-86974837	-	CROT	TCONS_00322801	0.689069	0.523012
ARAlincRNA_0524	XLOC_117493	7.17888	0.00582116	-0.116665	-0.146463	0.872874	-	chr7:99895281-99905094	-	SPDYE3	TCONS_00323735	1.42435	1.31371
ARAlincRNA_0525	XLOC_114329	6.47966	0.0200237	-0.63923	-0.800788	0.396114	RP11-309L24.9	chr7:128470430-128550773	+	CCDC136	TCONS_00316029	1.59797	1.02599
ARAlincRNA_0526	XLOC_118287	4.46691	0.0589279	-0.895132	-0.225583	0.870919	RP11-309L24.4	chr7:128470430-128550773	-	IRF5	TCONS_00325531	0.657634	0.353609
ARAlincRNA_0527	XLOC_114526	5.8921	0.0455488	1.0908	0.303501	0.884058	-	chr7:138794655-138795346	+	ZC3HAV1	TCONS_00316585	0.457257	0.973922
ARAlincRNA_0528	XLOC_114732	3.78121	0.0789373	0.220599	-0.456131	0.83887	-	chr7:149158242-149158972	+	ZNF777	TCONS_00317123	0.244182	0.284525
ARAlincRNA_0529	XLOC_114733	7.16975	0.00592047	-2.69712	-1.38289	0.34549	-	chr7:149159171-149159767	+	ZNF777	TCONS_00317124	0.539566	0.0832015
ARAlincRNA_0530	XLOC_114736	6.07712	0.0349842	-0.29801	-0.303798	0.86266	-	chr7:149434113-149434844	+	KRBA1	TCONS_00317143	0.976114	0.793946
ARAlincRNA_0531	XLOC_114782	6.46806	0.0196773	-3.50834	-2.59745	0.0349249	PRKAG2-AS1,linc-GALNTL5-1	chr7:151253196-151576341	+	RHEB	TCONS_00317500;TCONS_00317501;TCONS_00317502	0.715216	0.0628526
ARAlincRNA_0532	XLOC_119237	6.1622	0.0319601	0.521862	0.251142	0.887337	-	chr7:157127124-157128009	-	DNAJB6	TCONS_00327503	0.638306	0.916484
ARAlincRNA_0533	XLOC_121302	6.58665	0.0168776	0.683608	1.2157	0.0331662	-	chr8:158266-160074	-	ZNF596	TCONS_00333870	0.704084	1.13086
ARAlincRNA_0534	XLOC_119500	4.98077	0.0254357	-0.585043	-1.49119	0.168408	FPKM1_group_30893_transcript_1,RP11-177H2.2	chr8:10698084-10705076	+	PINX1,SOX7	TCONS_00328078;TCONS_00328076;TCONS_00328077	0.749662	0.499747
ARAlincRNA_0535	XLOC_119552	3.98894	0.058843	-0.373062	-0.567679	0.646047	linc-C8orf79-2	chr8:12294180-12302746	+	USP17L2	TCONS_00328227;TCONS_00328226;TCONS_00328225;TCONS_00328224;TCONS_00328223;TCONS_00328222;TCONS_00328221;TCONS_00328220;TCONS_00328230;TCONS_00328229;TCONS_00328228	1.46572	1.13174
ARAlincRNA_0536	XLOC_121794	5.32628	0.0886132	-0.242237	-0.8642	0.677819	FPKM1_group_30927_transcript_1	chr8:12614211-12614832	-	LONRF1	TCONS_00334736	0.307766	0.260196
ARAlincRNA_0537	XLOC_119819	5.36061	0.085756	0.372761	0.292863	0.760073	-	chr8:30045613-30047751	+	DCTN6,LEPROTL1	TCONS_00329364	1.28261	1.66077
ARAlincRNA_0538	XLOC_122409	5.66436	0.0612371	-0.107436	0.0615987	0.984094	RP11-150O12.3,linc-DUSP26-1	chr8:37454997-37457376	-	ZNF703	TCONS_00336135;TCONS_00336136;TCONS_00336137	0.162561	0.150895
ARAlincRNA_0539	XLOC_122436	6.02187	0.0382888	-0.0135709	-0.0210919	0.989374	-	chr8:37961460-37962532	-	BAG4	TCONS_00336186	3.46123	3.42883
ARAlincRNA_0540	XLOC_122523	6.11228	0.033231	-0.854286	-0.931373	0.251381	RP11-930P14.2	chr8:41510738-41754280	-	KAT6A	TCONS_00336473	1.62996	0.901597
ARAlincRNA_0541	XLOC_122605	7.93652	0.00129899	-0.651806	-0.118568	0.958464	FPKM1_group_31268_transcript_1	chr8:48169526-48171161	-	SPIDR	TCONS_00336638	0.166899	0.106228
ARAlincRNA_0542	XLOC_120198	6.8195	0.0115404	4.53876	2.54491	0.0277753	FPKM1_group_31417_transcript_2	chr8:61812602-61817109	+	CHD7	TCONS_00330611	0.0508272	1.18141
ARAlincRNA_0543	XLOC_120214	6.49793	0.0188673	0.195695	-0.879816	0.612735	-	chr8:63952956-63953404	+	GGH	TCONS_00330679	1.00967	1.15635
ARAlincRNA_0544	XLOC_122999	5.53631	0.0701548	-0.265203	-0.142671	0.905064	CTD-3025N20.3	chr8:66504084-66508944	-	ARMC1	TCONS_00337470;TCONS_00337471	0.830069	0.690685
ARAlincRNA_0545	XLOC_123815	3.64248	0.0436413	0.123417	-0.34945	0.788125	RP11-22C11.2,linc-KIAA1429-1	chr8:95649512-95652099	-	ESRP1	TCONS_00339221;TCONS_00339222	0.765425	0.833786
ARAlincRNA_0546	XLOC_123980	6.89667	0.00971155	-1.28564	-1.46323	0.29677	KB-1460A1.1,linc-YWHAZ	chr8:102134372-102138386	-	ZNF706	TCONS_00339667;TCONS_00339668	0.768837	0.315367
ARAlincRNA_0547	XLOC_120601	5.91766	0.0460109	-0.845476	-0.854569	0.51623	-	chr8:102219289-102219948	+	ZNF706	TCONS_00331991	1.02175	0.568634
ARAlincRNA_0548	XLOC_124010	4.54549	0.0526171	0.349082	0.841468	0.405363	FPKM1_group_31896_transcript_4	chr8:102472254-102681954	-	GRHL2	TCONS_00339726	0.329342	0.419499
ARAlincRNA_0549	XLOC_120639	4.69872	0.00503542	-0.463173	-0.503273	0.517443	KB-1732A1.1,linc-ATP6V1C1-3	chr8:103817744-103822673	+	KB-1507C5.2	TCONS_00332050;TCONS_00332051;TCONS_00332047;TCONS_00332048;TCONS_00332049	2.74677	1.99247
ARAlincRNA_0550	XLOC_124254	4.49413	0.0664399	-0.119126	0.105924	0.961044	FPKM1_group_32016_transcript_1	chr8:115614236-115624705	-	TRPS1	TCONS_00340288;TCONS_00340287	0.807531	0.74353
ARAlincRNA_0551	XLOC_120755	5.33528	0.0925227	0.962783	0.691561	0.463205	-	chr8:115727069-115728218	+	TRPS1	TCONS_00332371	0.434269	0.846418
ARAlincRNA_0552	XLOC_124502	5.63366	0.00634788	-0.854171	-0.510577	0.599607	RP11-383J24.6	chr8:125317796-125320617	-	TMEM65	TCONS_00340737;TCONS_00340736	0.582951	0.322479
ARAlincRNA_0553	XLOC_124641	4.79725	0.0438114	-1.34403	-1.97382	0.00578209	FPKM1_group_32207_transcript_1	chr8:128076304-128077253	-	FAM84B	TCONS_00340958	1.87695	0.739363
ARAlincRNA_0554	XLOC_124831	5.48004	0.0758383	2.15413	1.79326	0.0102974	FPKM1_group_32315_transcript_3	chr8:134346938-134366509	-	NDRG1	TCONS_00341398	0.495909	2.20729
ARAlincRNA_0555	XLOC_121082	5.89628	0.0443459	inf	4.22667	9.23668e-05	-	chr8:134371729-134372555	+	NDRG1	TCONS_00333102	0	0.831458
ARAlincRNA_0556	XLOC_121083	6.21678	0.0286403	inf	3.2935	0.00443567	-	chr8:134374505-134375297	+	NDRG1	TCONS_00333103	0	0.358986
ARAlincRNA_0557	XLOC_124847	5.93379	0.0440876	-0.815713	-0.946135	0.576742	-	chr8:134676012-134696272	-	ST3GAL1	TCONS_00341438	0.732412	0.416103
ARAlincRNA_0558	XLOC_121096	5.53771	0.0699452	0.611426	-0.948746	0.577598	CTD-2342N23.3,linc-KHDRBS3-5	chr8:135732687-135736192	+	ZFAT	TCONS_00333121;TCONS_00333122	0.199839	0.305307
ARAlincRNA_0559	XLOC_124948	6.27844	0.0262541	-1.83215	-1.31445	0.351232	FPKM1_group_32387_transcript_2	chr8:137543021-137997178	-	KHDRBS3	TCONS_00341577	0.262499	0.0737217
ARAlincRNA_0560	XLOC_124913	4.55159	0.0562989	0.632371	0.742651	0.489799	FPKM1_group_32363_transcript_1	chr8:137543021-137997178	-	KHDRBS3	TCONS_00341541	1.76245	2.732
ARAlincRNA_0561	XLOC_124998	5.41073	0.0854559	-0.356544	-0.443109	0.724978	-	chr8:141518967-141520276	-	CHRAC1	TCONS_00341682	1.0586	0.826798
ARAlincRNA_0562	XLOC_121135	5.33704	0.0877781	-1.11854	-1.0964	0.440482	linc-DENND3-3	chr8:141646242-141648531	+	AGO2	TCONS_00333234	0.292148	0.134552
ARAlincRNA_0563	XLOC_121189	5.40084	0.0818766	-1.04728	-0.849337	0.36036	-	chr8:144370417-144371397	+	ZNF696	TCONS_00333407	1.41698	0.685647
ARAlincRNA_0564	XLOC_121205	5.16696	0.0169268	0.738236	0.554419	0.630722	RP11-661A12.14	chr8:144683415-144691943	+	EEF1D	TCONS_00333462	0.811722	1.35406
ARAlincRNA_0565	XLOC_121216	7.06936	0.00725249	0.282649	0.65832	0.24965	-	chr8:144833838-144837646	+	FAM83H,MIR4664	TCONS_00333537	1.26329	1.5367
ARAlincRNA_0566	XLOC_121217	5.45658	0.0776202	-0.232983	0.0901978	0.951917	-	chr8:144837807-144838958	+	FAM83H,MIR4664	TCONS_00333538	1.41389	1.20304
ARAlincRNA_0567	XLOC_125226	5.71726	0.0562989	-1.16352	0.100733	0.974783	-	chr8:144975356-144976063	-	EPPK1	TCONS_00342328	0.248186	0.110795
ARAlincRNA_0568	XLOC_121255	5.94569	0.0418092	0.176971	0.303427	0.83217	-	chr8:145643468-145645370	+	SLC39A4	TCONS_00333713	0.554168	0.626491
ARAlincRNA_0569	XLOC_125287	5.98341	0.0411368	0.148708	0.334537	0.705624	-	chr8:146050707-146051600	-	COMMD5	TCONS_00342664	4.12362	4.57135
ARAlincRNA_0570	XLOC_128250	5.3634	0.0187529	nan	-2.33284	0.0773778	FPKM1_group_32878_transcript_1	chr9:23538697-23539827	-	CDKN2A	TCONS_00349685	0.211352	0
ARAlincRNA_0571	XLOC_125647	4.46236	0.0612674	1.14131	1.21461	0.476337	-	chr9:31848715-31983831	+	ACO1	TCONS_00343529	0.410282	0.905006
ARAlincRNA_0572	XLOC_128460	6.17899	0.0300571	0.33815	-0.307648	0.886925	-	chr9:33500441-33500808	-	NOL6	TCONS_00350065	1.4828	1.87445
ARAlincRNA_0573	XLOC_128461	5.09672	0.0195062	0.10721	-0.0850759	0.956047	SUGT1P,linc-NOL6-4	chr9:33503652-33511164	-	NOL6	TCONS_00350080;TCONS_00350075;TCONS_00350074;TCONS_00350079;TCONS_00350078;TCONS_00350068;TCONS_00350069;TCONS_00350071;TCONS_00350070;TCONS_00350073;TCONS_00350072;TCONS_00350066;TCONS_00350067;TCONS_00350077;TCONS_00350076	2.44845	2.63733
ARAlincRNA_0574	XLOC_128818	4.06913	0.077703	-0.683295	-0.405	0.83217	FPKM1_group_33061_transcript_1	chr9:45440311-45440693	-	FAM27C	TCONS_00350893	3.25169	2.02496
ARAlincRNA_0575	XLOC_128871	5.49945	0.0728738	-1.05749	-0.326613	0.838892	-	chr9:66490030-66491482	-	CBWD6,linc-CBWD6-3	TCONS_00350985	0.454469	0.218357
ARAlincRNA_0576	XLOC_128903	6.0723	0.0353996	0.668205	0.759894	0.39338	-	chr9:67051144-67340080	-	CBWD6,linc-CBWD6-3	TCONS_00351042	0.587543	0.933661
ARAlincRNA_0577	XLOC_126279	5.32188	0.0889206	0.18286	-0.392116	0.772798	-	chr9:79009541-79010451	+	RFK	TCONS_00344824	1.2254	1.39099
ARAlincRNA_0578	XLOC_129276	7.19399	0.00592047	-1.37987	-1.46753	0.00524017	FPKM1_group_33224_transcript_2	chr9:79226291-79633952	-	FOXB2	TCONS_00351719	1.8476	0.709947
ARAlincRNA_0579	XLOC_129533	7.56357	0.00276297	0.465908	0.304874	0.87977	FPKM1_group_33362_transcript_1	chr9:85688719-85690250	-	RASEF	TCONS_00352043	0.177032	0.244514
ARAlincRNA_0580	XLOC_129683	6.61505	0.0159259	-0.520886	-0.447209	0.688974	-	chr9:91000584-91002984	-	SPIN1	TCONS_00352323	0.771383	0.53761
ARAlincRNA_0581	XLOC_129708	5.6818	0.0586885	-0.708801	-3.82424	0.000750172	-	chr9:91620794-91621191	-	C9orf47,S1PR3	TCONS_00352349	2.06905	1.2659
ARAlincRNA_0582	XLOC_129910	5.67168	0.0612835	2.82115	0.467119		FPKM1_group_33506_transcript_1	chr9:96791619-96791980	-	PTPDC1,RP11-490F3.1	TCONS_00352766	0.0400424	0.282989
ARAlincRNA_0583	XLOC_130031	5.47067	0.0770872	-3.88296	-3.18041	0.0113701	-	chr9:99075949-99076198	-	SLC35D2	TCONS_00352985	4.20935	0.285317
ARAlincRNA_0584	XLOC_130262	4.47141	0.0582334	-0.13067	-0.409711	0.780755	FPKM1_group_33652_transcript_1	chr9:108004912-108005815	-	SLC44A1	TCONS_00353433	0.626016	0.571808
ARAlincRNA_0585	XLOC_130513	7.53415	0.00294881	-0.216959	-1.12483	0.00385399	-	chr9:115138566-115142125	-	HSDL2	TCONS_00353828	8.11608	6.98289
ARAlincRNA_0586	XLOC_130521	3.63782	0.0909538	0.705343	-0.503974	0.76791	RP11-276E15.4,linc-C9orf80	chr9:115505050-115512795	-	SNX30	TCONS_00353852;TCONS_00353853;TCONS_00353851	0.252529	0.411757
ARAlincRNA_0587	XLOC_130655	5.74046	0.057269	5.39861	3.58233	0.00270312	FPKM1_group_33805_transcript_1	chr9:122621445-122631665	-	CDK5RAP2	TCONS_00354145;TCONS_00354146	0.0475914	2.00757
ARAlincRNA_0588	XLOC_126943	5.61172	0.00725328	0.0536104	-0.00270755	0.998577	RP11-498E2.7	chr9:125086123-125092949	+	RBM18	TCONS_00346542;TCONS_00346541	2.28543	2.37196
ARAlincRNA_0589	XLOC_130901	6.30235	0.0253138	-1.93492	-1.44852	0.276468	-	chr9:130369716-130370731	-	C9orf117,TTC16	TCONS_00354684	0.548919	0.143562
ARAlincRNA_0590	XLOC_127071	6.9714	0.00867483	-0.118964	-0.281002	0.875853	RP11-339B21.11	chr9:131153739-131155789	+	URM1	TCONS_00347051	1.27979	1.17849
ARAlincRNA_0591	XLOC_127121	6.3737	0.0228219	-0.855307	-1.07845	0.301009	-	chr9:132223438-132223769	+	NTMT1	TCONS_00347314	4.7476	2.62423
ARAlincRNA_0592	XLOC_127133	7.32148	0.00436442	-1.34117	-0.955636	0.373173	-	chr9:132806145-132806612	+	FNBP1	TCONS_00347373	0.622649	0.24576
ARAlincRNA_0593	XLOC_127134	5.00807	0.0251863	-0.93566	0.180088		RP11-138E2.1	chr9:132806991-132807899	+	FNBP1	TCONS_00347374	0.291641	0.152471
ARAlincRNA_0594	XLOC_127179	7.45551	0.00359707	1.11633	1.14111	0.0130791	FPKM1_group_33965_transcript_3	chr9:134434638-134439019	+	UCK1	TCONS_00347583	0.688954	1.49361
ARAlincRNA_0595	XLOC_131139	6.28381	0.0259386	-1.01433	-0.716825	0.550588	LL09NC01-251B2.3,linc-BRD3-6	chr9:136997363-137025093	-	WDR5	TCONS_00355487;TCONS_00355486;TCONS_00355485;TCONS_00355488	0.93253	0.461658
ARAlincRNA_0596	XLOC_127218	6.70017	0.0136427	-1.02147	-1.11083	0.030477	-	chr9:137031324-137033145	+	WDR5	TCONS_00347734	3.62702	1.78672
ARAlincRNA_0597	XLOC_127219	7.0493	0.00733424	-2.79793	-2.14626	0.0398526	LL09NC01-139C3.1	chr9:137033890-137034462	+	WDR5	TCONS_00347735	1.16371	0.167335
ARAlincRNA_0598	XLOC_127278	5.28046	0.0927306	-0.0858129	0.0354949	0.983883	-	chr9:139623410-139625018	+	FAM69B	TCONS_00347918	1.39829	1.31755
ARAlincRNA_0599	XLOC_127289	5.6818	0.0586885	-0.20954	-0.152967	0.867318	-	chr9:139821713-139829572	+	FBXW5	TCONS_00348008;TCONS_00348006	2.4442	2.11378
ARAlincRNA_0600	XLOC_127336	5.54734	0.0704126	2.05479	1.15756	0.381498	-	chr9:140475877-140476515	+	DPH7	TCONS_00348180	0.419565	1.74323
ARAlincRNA_0601	XLOC_131402	6.34635	0.0243711	-4.05607	-0.929734	0.62447	-	chrX:70730-71589	+	PLCXD1	TCONS_00356112	0.407335	0.024488
ARAlincRNA_0602	XLOC_131404	5.74703	0.0552031	0.482351	-0.841429	0.548227	-	chrX:149621-150308	+	PLCXD1	TCONS_00356114	1.3232	1.84854
ARAlincRNA_0603	XLOC_133414	5.23857	0.0990248	-0.33129	-0.296079	0.896901	-	chrX:3730001-3730529	-	RP11-706O15.1	TCONS_00361156	0.846871	0.673114
ARAlincRNA_0604	XLOC_133415	4.69002	0.0428939	0.627106	0.262762	0.876037	-	chrX:3730635-3731811	-	RP11-706O15.1	TCONS_00361157	0.939384	1.45084
ARAlincRNA_0605	XLOC_131475	6.52677	0.0179438	-0.161856	-0.0231168	0.987231	linc-VCX3B-1,linc-VCX3B-2	chrX:7895865-8423740	+	PNPLA4	TCONS_00356300;TCONS_00356337;TCONS_00356299;TCONS_00356298	2.7882	2.4923
ARAlincRNA_0606	XLOC_134318	5.71532	0.05643	0.316854	0.527917	0.773028	-	chrX:47419603-47419926	-	ARAF	TCONS_00362754	1.14389	1.42485
ARAlincRNA_0607	XLOC_134405	5.94233	0.0438649	-0.89116	-0.781339	0.238024	-	chrX:48995857-48999366	-	GPKOW	TCONS_00363021	1.41622	0.7636
ARAlincRNA_0608	XLOC_134420	6.17641	0.0302934	-0.394739	-0.716982	0.625591	linc-FOXP3	chrX:49121663-49126008	-	PPP1R3F,linc-GAGE10	TCONS_00363074;TCONS_00363073	0.440468	0.335032
ARAlincRNA_0609	XLOC_132363	6.84239	0.0120849	0.623329	0.978929	0.0485248	FPKM1_group_34738_transcript_1	chrX:73164158-73513409	+	CHIC1	TCONS_00358505	4.06881	6.2677
ARAlincRNA_0610	XLOC_135073	3.28167	0.0844615	0.149355	0.582452	0.293882	FPKM1_group_34724_transcript_2,FPKM1_group_34724_transcript_4,FPKM1_group_34747_transcript_5,FPKM1_group_34747_transcript_6,FTX	chrX:73164158-73513409	-	SLC16A2	TCONS_00364340;TCONS_00364339;TCONS_00364354;TCONS_00364336;TCONS_00364341;TCONS_00364338;TCONS_00364335;TCONS_00364353;TCONS_00364285;TCONS_00364284;TCONS_00364295;TCONS_00364281;TCONS_00364280;TCONS_00364283;TCONS_00364282;TCONS_00364333;TCONS_00364332;TCONS_00364270;TCONS_00364271;TCONS_00364337;TCONS_00364279	12.0828	13.4008
ARAlincRNA_0611	XLOC_135111	3.98491	0.0155215	1.10951	1.37488	0.000102803	FPKM1_group_34739_transcript_1,RP3-368A4.5	chrX:73164158-73513409	-	SLC16A2	TCONS_00364318;TCONS_00364317	12.6062	27.2008
ARAlincRNA_0612	XLOC_135110	5.56753	0.0675977	0.33531	0.737065	0.183457	FPKM1_group_34738_transcript_1	chrX:73164158-73513409	-	SLC16A2	TCONS_00364316	2.08263	2.62754
ARAlincRNA_0613	XLOC_136056	5.52407	0.0755382	-0.971444	-0.0175743	0.995917	FPKM1_group_35159_transcript_5	chrX:118705778-118706358	-	UBE2A	TCONS_00365813	0.356339	0.181731
ARAlincRNA_0614	XLOC_133113	7.90227	0.00132064	-1.07239	-1.8563	3.59563e-06	LINC00086	chrX:134555867-134561999	+	ZNF449	TCONS_00360077	2.36088	1.12267
ARAlincRNA_0615	XLOC_136888	6.63514	0.0156737	-0.874789	-1.02729	0.405853	-	chrX:146977719-146978271	-	FMR1	TCONS_00367027	1.6069	0.876296
ARAlincRNA_0616	XLOC_133315	7.60121	0.00252676	0.100505	-0.625754	0.549805	-	chrX:153604744-153606601	+	FLNA	TCONS_00360744	0.873458	0.936477
ARAlincRNA_0617	XLOC_137694	4.07574	0.0748335	-0.346527	-0.188538	0.831839	-	chrY:13321723-13324640	-	USP9Y	TCONS_00368939	3.44903	2.71257
ARAlincRNA_0618	XLOC_137795	5.3249	0.0886333	0.454725	0.335406	0.867318	-	chrY:15346205-15347211	-	UTY	TCONS_00369050	0.494429	0.677626
ARAlincRNA_0619	XLOC_137873	5.49945	0.0728738	-0.700363	-1.14565	0.0489184	FPKM1_group_35559_transcript_2	chrY:21247400-21249128	-	AC009977.1	TCONS_00369168	2.08794	1.28496

## Sheet: NonA-lincRNAs
Table S8 - NonA-lincRNAs (this tab) and ARA-lincRNAs (the previous tab) in LNCaP cells
619 selected NonA-lincRNAs in LNCaP (see Methods)
Note: The genomic coordinates of lincRNAs annotated as FPKM1_group_nnnnn_transcript_n can be found in Hangauer et. al. 2013, PLoS Genet 9, e1003569.
xloc_lincRNA	RIP-Seq log2_(antiAR/IgG)	RIP-Seq pvalue_adjusted	RNA-seq log2_(androgen/vehicle); Cuffdiff2	RNA-seq log2_(androgen/vehicle); DESeq2	RNA-seq pvalue_adjusted; DESeq2	Previously annotated lincRNA transcripts in locus	locus (hg19)	strand	neighbor_protein-coding_gene(s)	NonA-lincRNA Mean_FPKM_in_vehicle_samples	NonA-lincRNA Mean_FPKM_in_Androgen_samples
XLOC_126721	4.55845e-05	0.999967	0.109187	0.475592	0.723526	FPKM1_group_33632_transcript_1	chr9:105902804-106087316	+	SMC2	0.393922	0.424892
XLOC_012755	-0.000873611		-1.05897	-0.865907	0.536907	RP11-222A11.1,linc-LRRTM3-2,linc-LRRTM3-3	chr10:67330095-67526483	+	JMJD1C	0.365908	0.175626
XLOC_039568	-0.000873611		-0.141065	0.407466	0.711443	FPKM1_group_9277_transcript_3	chr14:73589382-73590608	-	PSEN1	0.854416	0.774826
XLOC_073022	-0.000873611		-1.51387	-1.6727	0.0711933	FPKM1_group_17889_transcript_2	chr2:186868629-186872696	-	FSIP2	0.166019	0.0581349
XLOC_013688	-0.000873611		2.72787	0.982082	0.409255	FPKM1_group_4097_transcript_1,RP11-383C5.3,linc-C10orf137-1	chr10:127371797-127452712	+	UROS	0.0790476	0.523673
XLOC_037731	-0.00113453	0.999702	3.32024	1.47344	0.325639	CTD-2311B13.5	chr14:19553364-19590078	-	CTD-2292M16.8,FPKM1_group_8501_transcript_3,FPKM1_group_8501_transcript_4,TTC5	0.0336602	0.336209
XLOC_042225	0.00123253		-1.1169	-0.190629	0.933904	FPKM1_group_10853_transcript_3	chr15:93143783-93353114	+	FAM174B,FPKM1_group_10850_transcript_1,FPKM1_group_10850_transcript_2,FPKM1_group_10850_transcript_3,FPKM1_group_10852_transcript_3,RP11-386M24.4,RP11-386M24.8,linc-FAM174B	0.131306	0.0605428
XLOC_034648	0.00123253		0.92473	0.248602	0.933571	FPKM1_group_7970_transcript_5	chr13:56122380-56122913	-	SUGT1	0.14431	0.273949
XLOC_086227	0.00152543	0.999642	-0.629466	-1.50169	0.143706	FPKM1_group_20875_transcript_1	chr3:14691380-14692996	-	CCDC174	0.397396	0.256883
XLOC_002585	0.00260291	0.999284	-0.186169	-0.223222	0.756736	linc-PPIAL4F-1	chr1:148928321-148951595	+	NBPF15,linc-NBPF15-1	2.91376	2.56101
XLOC_015038	0.00385972	0.999284	-0.357989	-2.02005		FPKM1_group_3238_transcript_1	chr10:43140472-43141011	-	ZNF33B	0.30335	0.236689
XLOC_092993	0.00495271	0.99855	-0.996125	-0.87186	0.105639	MIR4453	chr4:153457415-153460415	+	FBXW7	2.03985	1.02267
XLOC_041716	-0.00539227	0.998424	-1.00334	-0.67731	0.251009	RP11-279F6.1,linc-LRRC49-4	chr15:69755364-70014771	+	RPLP1	22.7969	11.3721
XLOC_081102	-0.00545619		0.637521	0.548252	0.772127	FPKM1_group_20604_transcript_1	chr22:44883670-44887538	+	LDOC1L	0.0730958	0.113712
XLOC_073261	-0.00587904	0.998758	-0.921624	-1.77465	6.16771e-05	FPKM1_group_17954_transcript_1	chr2:188433293-188449840	-	TFPI	4.08866	2.15846
XLOC_078699	0.00713824		-0.737695	-0.642097	0.5037	FPKM1_group_20105_transcript_7	chr21:34876237-35351160	+	DNAJC28	0.27722	0.166248
XLOC_106683	0.00713824		-0.920977	-0.671871	0.63345	linc-RUNX2-3	chr6:44698854-44705091	+	RUNX2	0.212775	0.112377
XLOC_033903	0.00713824		-0.161093	-0.0134784	0.994967	FPKM1_group_7662_transcript_2	chr13:38624953-38717442	-	UFM1	3.15824	2.82457
XLOC_076059	-0.00791796	0.998765	-0.812699	-1.19443	0.123291	-	chr20:2622633-2624727	-	TMC2	0.843714	0.480339
XLOC_060778	0.00840656	0.997542	0.746284	0.831661	0.247936	linc-ZNF444-1	chr19:56598731-56636089	+	ZNF787	1.73387	2.90851
XLOC_077852	-0.0087396		inf	0.555677		FPKM1_group_19582_transcript_1	chr20:54091888-54101200	-	FAM210B	0	0.354488
XLOC_129944	-0.0087396		0.206883	0.541524	0.383796	FPKM1_group_33521_transcript_2	chr9:97258556-97283330	-	FBP2	0.88982	1.02702
XLOC_058852	0.0095597	0.99855	-0.271742	-0.440908	0.755915	AC004156.3	chr19:663481-668063	+	RNF126	0.526097	0.435776
XLOC_101998	0.00961634		-0.868059	0.376432	0.785942	FPKM1_group_25357_transcript_1	chr5:52430747-52431926	-	MOCS2	0.210561	0.115363
XLOC_055901	0.00961634		1.55834	1.49252	0.110498	FPKM1_group_13480_transcript_2	chr17:79834097-79835289	-	ARHGDIA	0.132873	0.391331
XLOC_008873	0.00961634		2.68035	0.485952		FPKM1_group_1543_transcript_1	chr1:158177032-158197015	-	ETV3	0.166608	1.06798
XLOC_064636	0.0103102		-1.1277	-0.238859	0.911206	AC105053.4,FPKM1_group_16634_transcript_1,RP11-548P2.2,linc-PTCD3-2	chr2:86116277-86144322	+	ST3GAL5	0.110474	0.0505579
XLOC_000567	-0.01051	0.997645	-0.632853	-1.21997	0.0942429	RP4-798A10.7	chr1:16841139-16842249	+	NECAP2	1.45906	0.940946
XLOC_002851	-0.0124518	0.998161	-0.477548	0.0677738	0.974595	-	chr1:155537445-155538952	+	ASH1L,MIR555	0.680211	0.488526
XLOC_104272	0.0136575	0.995783	-1.71397	-1.56883	0.0735614	-	chr5:132386705-132387584	-	HSPA4	2.4705	0.75306
XLOC_114960	-0.0140458	0.996692	-0.0893338	-0.341891	0.710385	AC074389.9	chr7:1727754-1787590	-	PSMG3	8.94022	8.40342
XLOC_100646	-0.0144715	0.99765	-0.0540179	-0.498133	0.570841	LINC00847	chr5:180253815-180262726	+	MGAT1	2.30809	2.22327
XLOC_049391	-0.0145652	0.997645	-2.06356	-1.245	0.432154	FPKM1_group_11785_transcript_3	chr16:67551853-67580691	-	CTCF	0.561008	0.134207
XLOC_002428	-0.0152025	0.997645	-1.37315	-0.974218	0.158366	-	chr1:142833308-142834251	+	NBPF8	2.02039	0.779965
XLOC_034703	0.0155986	0.996692	3.01771	0.815537		FPKM1_group_8005_transcript_1,linc-PCDH8-10	chr13:57709947-57712550	-	DIAPH3	0.021537	0.174423
XLOC_048159	-0.0168027		1.14152	0.992022	0.283418	FPKM1_group_11364_transcript_1	chr16:14396144-14420687	-	AC092291.2	0.617755	1.36285
XLOC_110742	-0.0168027		-0.64544	-0.240962	0.85498	FPKM1_group_28085_transcript_1	chr6:99310677-99314510	-	FBXL4	0.317384	0.202903
XLOC_051190	-0.0168027		nan	-1.35363		FPKM1_group_12677_transcript_2	chr17:36500936-36501536	+	SOCS7	0.154604	0
XLOC_095003	0.0168036	0.997128	-0.332357	-0.5094	0.356687	FPKM1_group_23417_transcript_1	chr4:66019757-66107754	-	CENPC	4.91124	3.90069
XLOC_047019	0.0172931	0.996881	1.45761	0.976551	0.334148	FPKM1_group_11925_transcript_8	chr16:75152884-75178642	+	LDHD	0.0630103	0.173059
XLOC_055184	0.0174834		0.497832	0.536558	0.778148	FPKM1_group_13166_transcript_1	chr17:64208150-64252643	-	PRKCA	4.18096	5.90388
XLOC_113811	0.0174834		-0.0877308	-0.372693	0.568989	-	chr7:80962916-80963152	+	SEMA3C	151.337	142.408
XLOC_075265	0.0174834		-1.22362	-1.2512	0.458803	FAM182A	chr20:26035290-26073683	+	FAM182B,FPKM1_group_19046_transcript_1	0.118644	0.0508042
XLOC_108294	0.0174834		nan	-1.0416		FPKM1_group_27057_transcript_1	chr6:8435890-8609623	-	SLC35B3	0.144815	0
XLOC_017563	0.0181113	0.997338	0.390446	0.594198	0.78661	-	chr10:134267968-134268461	-	C10orf91	0.487246	0.638682
XLOC_041143	0.0188086		0.94301	1.32341	0.340707	ANP32AP1,FPKM1_group_9953_transcript_5	chr15:35473124-35838394	+	AQR,ZNF770	0.127577	0.24527
XLOC_128822	0.0189786	0.996924	1.56436	0.802253	0.691514	-	chr9:45723094-45723610	-	FAM27D1	0.251954	0.745146
XLOC_093282	-0.0194522		-1.13768	-0.1306	0.962154	linc-STOX2	chr4:184687062-184688453	+	TRAPPC11	0.102998	0.0468118
XLOC_134272	-0.0194522		1.27709	1.76212	0.118537	FPKM1_group_34485_transcript_1	chrX:46146785-46147044	-	KRBOX4	0.856612	2.076
XLOC_063266	0.0200861	0.993497	-0.229819	-0.248243	0.745932	CTD-3018O17.3	chr19:52892094-52901019	-	ZNF528	6.76747	5.77091
XLOC_052088	-0.024469	0.992204	0.130911	-0.134329	0.908014	SNHG16	chr17:74553847-74583038	+	CYGB,RP11-666A8.8	80.561	88.213
XLOC_070819	0.025171		-0.774928	-0.0885708		FPKM1_group_16948_transcript_4	chr2:113620192-113620623	-	CKAP2L	0.158383	0.0925618
XLOC_101030	0.025171		-0.431241	0.03977	0.978253	CTD-2199O4.6,FPKM1_group_24933_transcript_1,FPKM1_group_24933_transcript_11,FPKM1_group_24933_transcript_2,FPKM1_group_24933_transcript_7	chr5:10203711-10207280	-	CCT5,CTD-2256P15.1	3.57285	2.64971
XLOC_108010	-0.0273816		0.857035	1.50803	0.26118	FPKM1_group_26931_transcript_1	chr6:786571-787461	-	EXOC2	0.0720135	0.130439
XLOC_073115	0.0277206		-1.12319	-0.664783	0.701098	FPKM1_group_17915_transcript_1,FPKM1_group_17915_transcript_2	chr2:187151145-187155297	-	ZC3H15	0.105908	0.04862
XLOC_104053	-0.0281191	0.99421	3.76406	3.15482	2.78056e-06	FPKM1_group_26247_transcript_1	chr5:124171552-124186159	-	ZNF608	0.309944	4.21092
XLOC_032584	-0.0282852	0.991864	0.566744	0.671333	0.230274	FPKM1_group_7797_transcript_1,TPT1-AS1,linc-COG3-1	chr13:45911007-45965872	+	SNORA31,TPT1	7.63889	11.3145
XLOC_024776	-0.0296589	0.995404	-0.37422	-0.272895	0.873936	FPKM1_group_5558_transcript_3	chr11:125554727-125556760	-	ACRV1	0.314228	0.242434
XLOC_052372	-0.0296636		-0.075336	-1.72157	0.20096	-	chr17:1170539-1171434	-	ABR,FPKM1_group_12143_transcript_1	0.542236	0.514648
XLOC_122407	0.0322105	0.994515	-0.0323157	-0.370307	0.809978	RP11-150O12.1,RP11-150O12.6,RP11-527N22.2,linc-DUSP26-5,linc-DUSP26-6	chr8:37262956-37411701	-	ZNF703	1.20762	1.18087
XLOC_034793	0.0326485		0.081074	0.25506	0.823271	FPKM1_group_8048_transcript_2,LINC00355	chr13:64558468-64650144	-	TDRD3	0.465209	0.492101
XLOC_113540	0.0331702	0.991755	-0.192057	-0.338686	0.841647	GS1-124K5.4,linc-KCTD7-2	chr7:65958692-65961297	+	TPST1	8.63693	7.56039
XLOC_065987	0.0337897		-1.15813	-1.40878	0.151562	FPKM1_group_17931_transcript_1	chr2:187318512-187321649	+	ZC3H15	0.34246	0.153454
XLOC_025232	0.0337897		-2.28656	-2.96396	0.00311233	RP5-1063M23.2	chr12:3427883-3435148	+	TSPAN9	0.240023	0.0491961
XLOC_035313	0.0337897		0.288805	-0.507748	0.83887	FPKM1_group_8287_transcript_1	chr13:91400967-91401384	-	TGDS	0.463836	0.566635
XLOC_055271	-0.0348623		-0.523044	-0.445454	0.726671	FPKM1_group_13209_transcript_6	chr17:66220174-66222756	-	AMZ2	0.499969	0.347929
XLOC_051931	-0.0350754	0.990771	0.243094	0.0916661	0.935542	FPKM1_group_13205_transcript_2,LINC00674	chr17:66097808-66148609	+	KPNA2	5.48956	6.49705
XLOC_071278	0.0351508	0.991154	2.09503	2.13138	1.51157e-11	AC079776.7,FPKM1_group_17192_transcript_3,FPKM1_group_17192_transcript_4	chr2:130724164-130740311	-	POTEF	9.3706	40.0346
XLOC_045619	-0.0353622	0.992204	-0.113395	-0.304474	0.898469	FPKM1_group_11111_transcript_1	chr15:101835622-102065405	-	TM2D3	0.26067	0.240966
XLOC_120986	0.0355729	0.989678	-1.2497	-2.26501	1.51385e-08	PCAT1,TU_0099864_0,TU_0099865_0	chr8:127725888-128061762	+	FAM84B	19.3235	8.12621
XLOC_048732	0.0362708	0.990724	0.289623	-0.0999644	0.91518	RP11-452L6.1,RP11-452L6.5	chr16:31459830-31478487	-	ARMC5	21.9954	26.8855
XLOC_107446	0.0362737		-2.3256	-1.55696	0.0342955	FPKM1_group_28381_transcript_5,RP11-527F13.1	chr6:126492844-126523385	+	CENPW,FPKM1_group_28393_transcript_1	0.101378	0.0202241
XLOC_119681	-0.036494	0.989495	0.336952	-0.358848	0.737368	RP11-1149O23.3,linc-CHMP7	chr8:23046791-23088598	+	TNFRSF10D	4.75484	6.00577
XLOC_080171	-0.0372263		0.406572	0.00599106	0.996489	AP001055.6,linc-CSTB-1	chr21:45576306-45581437	-	AP001055.1,linc-CSTB-6	2.36696	3.13748
XLOC_061037	0.0374039	0.989617	-0.0970569	-0.0809019	0.971927	CTB-31O20.2	chr19:1864362-1876168	-	ABHD17A	1.88536	1.76269
XLOC_103715	0.037473	0.993643	-0.312554	-0.432408	0.581363	FPKM1_group_26125_transcript_8	chr5:107718262-107724207	-	FBXL17	4.23031	3.40631
XLOC_083488	-0.0377991		-0.316732	-0.024118	0.985916	FPKM1_group_21179_transcript_7	chr3:47205719-47388306	+	SETD2	1.24321	0.998157
XLOC_016753	-0.0378791	0.992836	-1.39637	-0.294329	0.882338	FPKM1_group_3851_transcript_1,linc-OBFC1	chr10:105697903-105726769	-	SLK	0.793514	0.301443
XLOC_123120	-0.0384522	0.994002	0.242128	-0.78478		FPKM1_group_31511_transcript_1	chr8:71318962-71319482	-	NCOA2	0.0875956	0.103602
XLOC_082129	-0.0387925	0.992768	0.0450725	0.0735325	0.97434	FPKM1_group_20493_transcript_3	chr22:35318598-35627058	-	HMGXB4	0.456348	0.470831
XLOC_009037	0.0391646		-1.21403	-0.853924	0.578324	FPKM1_group_1584_transcript_2,FPKM1_group_1584_transcript_4	chr1:161731623-161734178	-	ATF6	0.228746	0.0986038
XLOC_083916	0.0394866	0.990739	-0.0502958	-0.610507	0.174092	FPKM1_group_21546_transcript_1,linc-CHMP2B-1	chr3:87138429-87206950	+	CHMP2B	16.7856	16.2105
XLOC_003282	0.0400979		0.130424	-0.749668	0.723358	FPKM1_group_1743_transcript_1,FPKM1_group_1743_transcript_3	chr1:178580473-178589486	+	RALGPS2	0.101186	0.11076
XLOC_137106	-0.0410378		-0.416805	0.252875	0.853798	FPKM1_group_35466_transcript_3,U52111.14	chrX:152965946-153051187	-	SSR4	0.780002	0.584286
XLOC_017242	-0.0411346		-4.21072	-1.24599		-	chr10:120965744-120966129	-	GRK5	1.79998	0.097211
XLOC_033799	-0.0411346		1.13389	0.846892	0.585327	TU_0043401_0,TU_0043403_0	chr13:34922179-35245319	-	RFC3	0.264512	0.580472
XLOC_108486	-0.0411346		nan	-2.40813		FPKM1_group_27166_transcript_1,FPKM1_group_27166_transcript_2	chr6:14208106-14208687	-	CD83	0.62036	0
XLOC_087987	-0.0411346		2.10997	0.304474		FPKM1_group_21519_transcript_1	chr3:81399999-81400319	-	GBE1	0.0513832	0.221813
XLOC_116283	0.0412584	0.989049	-0.717954	-0.78744	0.576601	-	chr7:44835433-44835958	-	PPIA	2.52613	1.53578
XLOC_131408	-0.0419306	0.992648	0.723364	0.747362	0.119288	LINC00685,linc-SHOX-4	chrX:281384-286100	+	GTPBP6	10.8133	17.8531
XLOC_005826	0.0426584		-0.757035	-0.29949	0.843492	FPKM1_group_464_transcript_1	chr1:40942886-40974333	-	EXO5	0.645607	0.382013
XLOC_064195	0.0431733		-0.0384339	0.645168	0.486818	FPKM1_group_16082_transcript_3	chr2:54091203-54532437	+	ASB3,GPR75,GPR75-ASB3	0.299178	0.291313
XLOC_108225	-0.0432604	0.988842	-0.163278	-0.45987	0.510446	RP1-80N2.3	chr6:6659634-6745648	-	RREB1	1.74449	1.55782
XLOC_070798	-0.0433391	0.991537	0.328436	0.15705	0.914842	AC079922.3,linc-RGPD8-2	chr2:113399406-113403306	-	SLC20A1	1.3807	1.73367
XLOC_033742	-0.0434609		1.70448	-0.624229		FPKM1_group_7590_transcript_1,FPKM1_group_7590_transcript_2	chr13:31012484-31013715	-	AL356750.1,KATNAL1	0.0324135	0.105639
XLOC_109000	-0.0451648		0.782263	-0.386042	0.870919	FPKM1_group_27395_transcript_2	chr6:27117669-27119598	-	HIST1H2AH	0.178987	0.307826
XLOC_104807	-0.0452371	0.99277	1.15492	0.340362	0.88959	-	chr5:149807406-149807798	-	CD74	0.773945	1.72336
XLOC_044383	-0.0459256		1.46168	0.751008	0.704359	FPKM1_group_10500_transcript_1	chr15:72897523-72929260	-	BBS4	0.148426	0.408808
XLOC_097668	0.0469584	0.992645	-0.197165	-0.098773	0.969589	-	chr4:183792346-183792989	-	DCTD	0.721053	0.628948
XLOC_096368	0.0471354	0.992413	0.214469	0.199773	0.918863	-	chr4:120326671-120327033	-	PDE5A	2.00963	2.33173
XLOC_079123	0.0472423	0.992648	-1.13918	-1.35576	0.00148281	FPKM1_group_19818_transcript_1	chr21:15277153-15277488	-	AL050303.1	34.5267	15.6757
XLOC_003051	-0.0482592	0.989049	1.41716	1.46562	6.04286e-05	FPKM1_group_1592_transcript_11	chr1:162577551-162598177	+	DDR2	0.571741	1.52688
XLOC_091221	-0.0483036	0.987142	0.548763	0.25031	0.766198	AC093323.3	chr4:6672409-6677774	+	S100P,linc-S100P	9.48325	13.8724
XLOC_100293	-0.0489119		-0.296193	-0.134558	0.956909	FPKM1_group_26679_transcript_2	chr5:162438902-162864332	+	CCNG1	0.495675	0.403677
XLOC_109697	-0.0489119		2.81491	1.71042	0.101247	FPKM1_group_27592_transcript_2,FPKM1_group_27593_transcript_1,FPKM1_group_27593_transcript_2,RP1-261G23.5,linc-MRPS18A-1	chr6:43690456-43705589	-	VEGFA	0.131685	0.926629
XLOC_128651	-0.0501898		-0.0255453	-0.100075	0.94831	FPKM1_group_33023_transcript_1,linc-GNE	chr9:36312658-36315318	-	GNE	1.86892	1.83612
XLOC_052227	-0.0506832	0.988972	-0.839526	-0.836645	0.451675	-	chr17:79456479-79457808	+	ACTG1,RP13-766D20.2,linc-FSCN2-1	1.25763	0.702799
XLOC_093528	-0.0507651	0.992179	-1.47604	0.195375	0.930545	-	chr4:2843665-2844028	-	ADD1	0.632632	0.227415
XLOC_062685	-0.0510677	0.991154	-0.0349716	0.61301	0.653694	FPKM1_group_14858_transcript_2	chr19:40800040-40801091	-	AKT2	0.377408	0.36837
XLOC_051886	0.0519039		0.192716	0.521026	0.798807	FPKM1_group_13139_transcript_1	chr17:62936699-62954314	+	LRRC37A3	0.26174	0.299146
XLOC_112761	0.0520701	0.990739	0.384014	0.296774	0.680094	AC092171.4	chr7:5470965-5553429	+	TNRC18	8.88784	11.5983
XLOC_087833	-0.0535546		-0.362557	-0.294554	0.750208	FPKM1_group_21483_transcript_4	chr3:75749448-75753999	-	FRG2C	0.72423	0.563295
XLOC_127878	0.0537527		-1.76883	-0.750059	0.678528	FPKM1_group_32733_transcript_1,FPKM1_group_32734_transcript_1,RP11-54D18.3	chr9:14987167-15146399	-	TTC39B	0.188116	0.055202
XLOC_119687	-0.0544864	0.991628	-0.335235	-0.494858	0.583255	CTC-756D1.2,linc-SLC25A37	chr8:23315312-23342484	+	ENTPD4,LOXL2	1.35905	1.07726
XLOC_073809	-0.0554346	0.990249	0.213766	0.751315	0.326825	AC096772.6	chr2:208686013-208687493	-	CCNYL1,FZD5	0.685078	0.794493
XLOC_075633	-0.0560907		0.306336	-0.0832525	0.968991	linc-ARFGEF2-8	chr20:46653531-46702929	+	NCOA3	0.153126	0.18935
XLOC_080331	0.0569517	0.991525	0.0899592	0.337494	0.619869	AC006946.16	chr22:17544033-17556025	+	IL17RA,linc-CECR2-3	1.04763	1.11503
XLOC_079736	-0.0582876	0.990739	-0.844636	-0.506498	0.582504	FPKM1_group_20072_transcript_2,FPKM1_group_20072_transcript_3,FPKM1_group_20072_transcript_4	chr21:33021049-33025250	-	SOD1	1.51457	0.84339
XLOC_004674	0.0599685	0.990249	-0.686047	-0.186974	0.866128	RP11-338N10.3	chr1:6845383-7829766	-	VAMP3	1.70541	1.06001
XLOC_091033	0.060469	0.987804	-0.0640626	0.189677	0.934148	-	chr4:685189-685526	+	ATP5I	2.08405	1.99353
XLOC_043807	-0.0612214		0.655828	0.705741	0.249484	FPKM1_group_10263_transcript_2,FPKM1_group_10263_transcript_3	chr15:58245621-58861151	-	ADAM10	0.709115	1.11722
XLOC_032053	-0.0612214		0.0250836	0.369128	0.867931	FPKM1_group_7421_transcript_2	chr12:132301021-132301573	-	ULK1	0.177924	0.181045
XLOC_069092	-0.0612214		-0.0127578	0.736207	0.747137	AC010733.4,FPKM1_group_16201_transcript_1	chr2:61052266-61108449	-	REL,RP11-373L24.1	0.117172	0.11614
XLOC_064194	-0.0612214		0.262856	0.723755	0.541872	FPKM1_group_16082_transcript_2	chr2:54091203-54532437	+	ASB3,GPR75,GPR75-ASB3	0.796838	0.956087
XLOC_064221	-0.0612214		0.63758	1.24025	0.420608	FPKM1_group_16110_transcript_2	chr2:55741951-55744885	+	CCDC104	0.0645222	0.100378
XLOC_127780	-0.0612214		-0.296856	0.492498	0.711584	FPKM1_group_32698_transcript_2	chr9:13100775-13103278	-	MPDZ	0.137204	0.111687
XLOC_064987	-0.0612214		inf	2.98481	0.0218599	FPKM1_group_16830_transcript_2,linc-RGPD4-4	chr2:107318210-107417250	+	UXS1	0	0.25668
XLOC_034056	-0.0612214		-0.174284	-0.0478263	0.976776	FPKM1_group_7734_transcript_6	chr13:41396431-41495910	-	WBP4	1.61276	1.42924
XLOC_094713	-0.0612219		1.3977	0.595838	0.746443	FPKM1_group_23320_transcript_2	chr4:48332987-48334347	-	SLAIN2	0.123666	0.325838
XLOC_081466	-0.0612219		-0.622414	-0.378505	0.679134	FPKM1_group_20275_transcript_1,FPKM1_group_20275_transcript_2	chr22:18559292-18629321	-	AC008132.13,FPKM1_group_20277_transcript_1,FPKM1_group_20278_transcript_1,USP18,linc-DGCR6-1	1.16388	0.756034
XLOC_039190	-0.0612219		-1.44377	-0.0821502	0.98152	FPKM1_group_9124_transcript_3	chr14:61654000-62125414	-	HIF1A,RP11-618G20.1,SNAPC1	0.170156	0.0625503
XLOC_112627	-0.0612219		1.17096	0.287784	0.912521	FPKM1_group_28950_transcript_2	chr6:170124794-170139088	-	ERMARD	0.044684	0.100611
XLOC_021116	-0.0612219		0.428654	0.824414	0.500181	FPKM1_group_4218_transcript_2	chr11:7956235-7957096	-	EIF3F	0.328245	0.441811
XLOC_127470	-0.0612219		nan	-0.557196		FPKM1_group_32590_transcript_1	chr9:3526722-3671646	-	RFX3	0.122867	0
XLOC_032845	0.062295	0.983906	-0.908682	-1.15743	0.00293879	-	chr13:71054611-71057850	+	KLHL1	6.24536	3.32672
XLOC_108070	0.0632763		-0.659148	-1.34215	0.317931	FPKM1_group_26954_transcript_3	chr6:2245981-2484261	-	GMDS	0.229744	0.145486
XLOC_052241	-0.0639096	0.990249	0.268052	0.45042	0.658327	FPKM1_group_13478_transcript_2	chr17:79690303-79691954	+	MRPL12,SLC25A10	0.995461	1.19871
XLOC_021480	-0.0651717	0.990715	0.0695835	-0.623573	0.597893	FPKM1_group_4344_transcript_2	chr11:23181526-23182028	-	SVIP	1.67193	1.75455
XLOC_003146	0.0655785		1.00301	1.18805	0.181273	-	chr1:168048099-168048855	+	MPC2	0.585587	1.17362
XLOC_043361	0.0669364	0.98809	0.0449571	-0.509982	0.434416	EIF3J-AS1,FPKM1_group_10069_transcript_1,FPKM1_group_10069_transcript_2,FPKM1_group_10069_transcript_3	chr15:44719431-44829121	-	EIF3J	5.09926	5.26066
XLOC_125544	-0.0669677	0.988971	-1.25411	-1.19233	0.341118	FPKM1_group_32814_transcript_6,RP11-399D6.2	chr9:22636864-22824212	+	CDKN2A	0.153833	0.0644949
XLOC_107926	0.0673436	0.990347	1.72714	0.219586	0.937614	-	chr6:167371069-167371363	+	RNASET2,RP11-514O12.4,RPS6KA2	0.542349	1.79556
XLOC_017641	-0.0684472		-0.0468497	-0.307009	0.776411	-	chr11:507659-509627	+	RNH1	1.52361	1.47493
XLOC_071188	-0.0702255	0.990114	1.14852	0.911209	0.171841	-	chr2:128161291-128162150	-	MAP3K2	2.05387	4.55315
XLOC_055248	-0.0708552	0.989871	-0.732739	-1.22576	0.408239	AC145343.2,FPKM1_group_13200_transcript_1	chr17:66092147-66097615	-	KPNA2	0.849938	0.511459
XLOC_073165	0.0714522		-0.153087	0.40398	0.654141	FPKM1_group_17928_transcript_1	chr2:187263265-187266511	-	ZC3H15	0.261545	0.235214
XLOC_067864	-0.0718649	0.989871	-1.22674	-1.92341		-	chr2:26255308-26255639	-	RAB10	0.956413	0.408658
XLOC_014673	-0.0737761	0.987375	0.585589	0.527727	0.733508	FPKM1_group_3074_transcript_2	chr10:29078116-29104364	-	BAMBI	0.0786655	0.118049
XLOC_018365	-0.0741176	0.987142	-1.66346	-1.43804	0.00342684	FPKM1_group_4349_transcript_3,FPKM1_group_4349_transcript_4	chr11:23683279-23701462	+	SVIP	1.47928	0.46698
XLOC_008913	-0.0744781	0.987777	inf	0.68615		FPKM1_group_1550_transcript_1	chr1:159465243-159467032	-	DUSP23	0	0.130124
XLOC_075465	-0.0752126	0.98263	0.953626	0.434859	0.590443	SNHG11	chr20:37075220-37079564	+	RALGAPB	2.53619	4.91193
XLOC_131772	-0.0757038	0.983817	0.514654	0.902801	0.617894	FPKM1_group_34434_transcript_2	chrX:39646128-39646370	+	BCOR	1.36928	1.95623
XLOC_097590	-0.0764987	0.982644	0.943543	-0.235346	0.826213	FPKM1_group_24539_transcript_1	chr4:178366132-178598280	-	AGA	12.9067	24.8227
XLOC_055902	-0.0766278	0.984287	0.0185439	0.188583	0.873519	RP11-498C9.15	chr17:79836300-79840964	-	ANAPC11,NPB	2.83146	2.86809
XLOC_119549	0.0771339	0.987804	-1.66085	-1.50648	0.00333978	RP11-351I21.11	chr8:12270335-12271882	+	USP17L2	4.17599	1.32067
XLOC_030323	0.077169		0.205497	0.0885272	0.934439	FPKM1_group_6680_transcript_1,FPKM1_group_6680_transcript_2,RP1-78O14.1	chr12:79257772-79897176	-	PPP1R12A	1.28673	1.48371
XLOC_089940	0.077169		4.35476	1.48508	0.0415066	FPKM1_group_22351_transcript_1	chr3:164892533-164892877	-	SLITRK3	0.132341	2.70774
XLOC_095387	0.077169		-0.341356	0.0905403	0.954496	FPKM1_group_23538_transcript_2	chr4:78005122-78007624	-	CCNI	0.31659	0.249884
XLOC_121759	0.0771911	0.985651	-0.773211	-0.708654	0.133918	FPKM1_group_30915_transcript_1,FPKM1_group_30915_transcript_2,FPKM1_group_30915_transcript_3,FPKM1_group_30915_transcript_4,FPKM1_group_30915_transcript_5,FPKM1_group_30916_transcript_2	chr8:12394144-12514558	-	LONRF1	14.5769	8.52915
XLOC_056056	-0.077233	0.980767	-0.279081	-0.501145	0.43346	FPKM1_group_13562_transcript_4,LINC00667	chr18:5232874-5246507	+	ZBTB14	6.71669	5.53533
XLOC_105339	0.0774898	0.987142	-0.181224	-0.0224991	0.9882	FPKM1_group_26815_transcript_1	chr5:173446269-173446555	-	CPEB4	10.6563	9.3984
XLOC_062878	-0.0776412		nan	-0.205153		FPKM1_group_14899_transcript_1	chr19:45441046-45441467	-	CLPTM1	0.139671	0
XLOC_059108	-0.0776412		-0.161721	0.103318	0.976632	FPKM1_group_14411_transcript_1	chr19:8218729-8219129	+	CERS4	0.171009	0.152875
XLOC_109021	-0.0776412		0.627093	1.00934	0.502133	FPKM1_group_27407_transcript_2	chr6:27462583-27464212	-	ZNF184	0.0767557	0.118545
XLOC_103259	-0.0776412		-1.27292	-2.57981	0.0629539	FPKM1_group_25869_transcript_4	chr5:89751855-89752833	-	POLR3G	0.173878	0.0719544
XLOC_135002	-0.0776412		0.112116	0.469031	0.743931	FPKM1_group_34705_transcript_3,FPKM1_group_34705_transcript_5	chrX:70574611-70576346	-	TAF1	0.276656	0.299013
XLOC_070073	-0.0776412		-0.175861	0.303353	0.87	FPKM1_group_16657_transcript_5	chr2:87754886-87906324	-	KRCC1	0.362286	0.32071
XLOC_085566	-0.0776412		-0.605242	0.301549	0.867942	FPKM1_group_22540_transcript_2	chr3:182710579-182713601	+	DCUN1D1,linc-DCUN1D1	0.152982	0.100565
XLOC_134500	-0.0776412		-0.505775	-0.109578	0.942443	FPKM1_group_34532_transcript_1	chrX:53122891-53200096	-	KDM5C	0.61012	0.429696
XLOC_007041	0.0779719		-0.210441	0.495302	0.612296	FPKM1_group_956_transcript_1,FPKM1_group_956_transcript_2	chr1:84743003-84763755	-	DNASE2B,RP11-376N17.4,SAMD13	0.934517	0.807678
XLOC_126112	0.0782025		-0.866245	-1.52877	0.00911322	FPKM1_group_33066_transcript_1	chr9:66454660-66455944	+	CBWD6,linc-CBWD6-3	2.60592	1.42954
XLOC_109189	0.0782424	0.979307	-0.306827	-0.600577	0.192293	HCG17,HCG18	chr6:30201815-30314661	-	RPP21,TRIM39,TRIM39-RPP21	12.7575	10.3134
XLOC_116715	-0.0787926	0.979944	-0.135203	0.0578848	0.976295	-	chr7:65186227-65186457	-	VKORC1L1	10.477	9.53977
XLOC_090137	-0.0801828		0.308795	-1.18333	0.214382	FPKM1_group_22418_transcript_2	chr3:172317060-172318231	-	TNFSF10	0.774387	0.959211
XLOC_133419	-0.0810215	0.983001	-0.221271	0.333219	0.691985	RP11-706O15.3	chrX:3771050-3800358	-	RP11-706O15.1	1.99842	1.71426
XLOC_050701	0.0825976	0.983142	-0.0365893	0.528608	0.684237	-	chr17:17740378-17741493	+	SREBF1	0.651854	0.63553
XLOC_101905	0.0831614	0.98071	0.174214	0.162748	0.878051	FPKM1_group_25304_transcript_1,FPKM1_group_25305_transcript_2,FPKM1_group_25305_transcript_3,FPKM1_group_25305_transcript_5,NNT-AS1	chr5:43571508-43708521	-	PAIP1	3.47773	3.9241
XLOC_047467	0.0831953	0.988842	-0.23716	-0.0592453	0.973731	-	chr16:637805-638975	-	RAB40C,WFIKKN1	2.09614	1.77839
XLOC_067145	0.08434	0.987375	-1.18037	-0.762552	0.195238	RP11-254F7.2	chr2:10179218-10180790	-	KLF11	3.32535	1.46728
XLOC_085081	-0.0856346	0.978025	-0.11624	-0.270979	0.810498	linc-GMPS-1	chr3:155572512-155581520	+	SLC33A1	1.74238	1.6075
XLOC_114998	-0.0858376		1.2098	-0.0669512		AC073316.2,FPKM1_group_29006_transcript_1	chr7:3235145-3237888	-	AMZ1	0.0782721	0.181048
XLOC_045773	-0.0861667	0.987804	-0.00328529	0.746343	0.61787	linc-KCTD5	chr16:2693654-2696114	+	KCTD5	0.23484	0.234305
XLOC_065260	-0.0862016	0.987804	-0.73699	-1.35231	0.132691	linc-UGGT1	chr2:128569620-128570335	+	WDR33	2.19432	1.31657
XLOC_116472	-0.0867399	0.987142	-0.269541	0.0589064	0.956496	FPKM1_group_29729_transcript_1,FPKM1_group_29731_transcript_1,FPKM1_group_29733_transcript_2,GS1-179L18.1	chr7:53723201-53879624	-	SEC61G	7.60438	6.30847
XLOC_031524	-0.0876476	0.987142	-1.64918	-0.642595	0.753368	FPKM1_group_7193_transcript_1,RP11-116D17.3,linc-TBX3-2	chr12:115737392-115741687	-	TBX3	0.151732	0.0483753
XLOC_019329	0.0899865	0.986983	-0.154297	0.175887	0.854213	-	chr11:67097283-67101865	+	SSH3	1.15768	1.04026
XLOC_049801	0.091133		-0.0194723	0.287996	0.806287	linc-TMEM231	chr16:75562429-75657198	-	TERF2IP,linc-CNTNAP4	0.262162	0.258648
XLOC_054881	-0.0924954	0.987804	-0.0309854	-0.458001	0.747137	FPKM1_group_13048_transcript_1	chr17:55849155-55914249	-	MRPS23	1.05625	1.0338
XLOC_015309	0.0927989	0.986979	-3.3177	-3.03404	7.44057e-09	-	chr10:54968393-55036064	-	CSTF2T	1.94805	0.195377
XLOC_100761	0.0942714	0.987142	-0.0615715	1.08373	0.476882	-	chr5:1792701-1793460	-	NDUFS6	0.357958	0.343003
XLOC_125213	0.0944756	0.987375	0.664309	0.624598	0.296881	RP11-429J17.7,TU_0100361_0	chr8:144840064-144860230	-	MIR937,SCRIB	7.11369	11.2738
XLOC_014332	-0.0948331	0.977081	-0.572841	-0.483261	0.682459	RP11-398C13.6	chr10:14919686-14920685	-	SUV39H2	2.08023	1.39852
XLOC_091878	-0.0961185	0.974052	0.227522	-0.060447	0.95763	USP46-AS1	chr4:53525572-53532479	+	USP46	6.42054	7.51731
XLOC_088205	0.0961733		0.182998	0.20854	0.817665	FPKM1_group_21606_transcript_1	chr3:101407020-101418859	-	RPL24	4.40906	5.00535
XLOC_123728	0.0961733		1.01556	1.57602	0.00843785	FPKM1_group_31788_transcript_1	chr8:92112334-92113619	-	LRRC69,SLC26A7	0.65744	1.32914
XLOC_035491	0.0961733		-1.67423	-0.59236		FPKM1_group_8353_transcript_2,FPKM1_group_8353_transcript_5	chr13:100706141-100710943	-	PCCA	0.126088	0.0395077
XLOC_058481	0.0961733		0.226784	-0.0964095	0.975685	FPKM1_group_14156_transcript_2	chr18:60175144-60175794	-	ZCCHC2	0.349991	0.409567
XLOC_134506	0.0961733		0.408556	0.565182	0.650849	FPKM1_group_34534_transcript_3	chrX:53122891-53200096	-	KDM5C	0.324511	0.430741
XLOC_064754	0.0961733		-1.11543	-0.45332	0.754499	FPKM1_group_16699_transcript_1	chr2:92305832-92316263	+	RPIA	1.38142	0.6376
XLOC_069966	0.0961733		-0.115018	-0.143256	0.954706	FPKM1_group_16620_transcript_4	chr2:85763360-85764193	-	MAT2A	0.323356	0.298577
XLOC_006254	0.0961733		0.454606	0.662612		FPKM1_group_581_transcript_2	chr1:53020350-53021568	-	ZCCHC11	0.155973	0.213747
XLOC_032491	0.0961733		0.423591	-0.740962	0.710012	FPKM1_group_7734_transcript_5	chr13:41396431-41495910	+	SLC25A15	0.263218	0.353045
XLOC_063424	0.0961733		0.636393	0.310451		FPKM1_group_15019_transcript_1	chr19:55924744-55925002	-	UBE2S	0.318743	0.495466
XLOC_072680	0.0961733		1.14877	0.611625	0.515781	FPKM1_group_17740_transcript_1	chr2:181218618-181277722	-	CWC22	6.64784	14.7399
XLOC_063955	0.0961733		2.41533	0.551883		RP11-373D23.3	chr2:28648811-28649586	+	FOSL2	0.040088	0.213847
XLOC_124465	0.0961733		1.08036	1.14392		FPKM1_group_32098_transcript_1	chr8:124230821-124231150	-	C8orf76,ZHX1,ZHX1-C8ORF76	0.123772	0.261725
XLOC_016029	0.0961733		-0.551699	-0.946225	0.385255	FPKM1_group_3580_transcript_1	chr10:81806003-81852548	-	TMEM254	0.740429	0.505133
XLOC_082518	0.0961733		0.291036	0.258561		FPKM1_group_20609_transcript_3	chr22:45057491-45064238	-	ARHGAP8,PRR5,PRR5-ARHGAP8	0.174961	0.214068
XLOC_124707	0.0961733		2.23254	1.32973	0.461902	FPKM1_group_32248_transcript_1	chr8:129168457-129169487	-	FPKM1_group_32235_transcript_1,FPKM1_group_32235_transcript_3,TMEM75	0.0215629	0.101337
XLOC_118641	0.0961733		-0.0478994	0.236497	0.91518	FPKM1_group_30492_transcript_1	chr7:138881154-138881732	-	UBN2	0.472178	0.456759
XLOC_108472	0.0961733		-0.382365	0.0168409	0.996248	FPKM1_group_27153_transcript_1	chr6:13713451-13713985	-	RANBP9	0.118421	0.0908504
XLOC_082133	0.0961733		-0.93699	-0.280725	0.912521	FPKM1_group_20497_transcript_2	chr22:35318598-35627058	-	HMGXB4	0.212477	0.110981
XLOC_033636	0.0961733		-1.6465	-1.58587		FPKM1_group_7552_transcript_4	chr13:27617761-27620545	-	USP12	0.206247	0.0658782
XLOC_081459	0.0961733		-1.76446	-0.507918	0.831361	FPKM1_group_20270_transcript_2	chr22:18539655-18540431	-	PEX26,TUBA8,XXbac-B476C20.10	0.121779	0.0358441
XLOC_035014	0.0961733		-0.964208	-0.634333	0.679809	FPKM1_group_8114_transcript_4	chr13:76123618-76434004	-	LMO7,RP11-29G8.3,UCHL3	0.751112	0.38499
XLOC_082656	0.0961733		-0.0196326	-1.35776	0.0896066	FPKM1_group_20677_transcript_1	chr22:48308723-48310264	-	TBC1D22A	2.13478	2.10593
XLOC_113645	0.0961733		0.120407	-0.0570281	0.970755	FPKM1_group_29875_transcript_3	chr7:73156592-73158380	+	ABHD11	1.92879	2.09667
XLOC_053985	0.0961733		-1.08195	-0.685887	0.755307	FPKM1_group_12714_transcript_1	chr17:38051851-38057786	-	GSDMB	0.1635	0.0772356
XLOC_009506	0.0961733		nan	-1.79766		FPKM1_group_1737_transcript_2	chr1:178541740-178548896	-	RALGPS2	0.206359	0
XLOC_122785	0.0961733		-0.769923	-0.94455	0.571941	FPKM1_group_31354_transcript_1	chr8:56990965-56991469	-	RPS20,SNORD54	0.787797	0.462002
XLOC_110127	0.0961733		0.451849	0.134394	0.94831	FPKM1_group_27749_transcript_4	chr6:71897276-72130522	-	OGFRL1	0.374525	0.512272
XLOC_042231	0.0961733		-3.47848	-0.528519		FPKM1_group_10860_transcript_1,linc-MCTP2-6	chr15:93632682-93763011	+	AC013394.2,CHD2,MIR3175	0.147977	0.0132761
XLOC_029118	0.0961733		-2.65157	-1.79518	0.210341	FPKM1_group_6162_transcript_1	chr12:47697611-47698372	-	AMIGO2	0.442624	0.0704421
XLOC_129041	0.0961733		-1.2957	-0.691048		FPKM1_group_33110_transcript_1	chr9:70838913-70839689	-	AL591479.1	0.608673	0.247936
XLOC_122452	0.0961733		1.2187	-0.122785	0.962154	RP11-675F6.3,RP11-675F6.4,linc-C8orf86-1,linc-C8orf86-2	chr8:38401169-38416538	-	FGFR1	0.121041	0.281706
XLOC_101031	0.0961733		-0.120957	0.683589	0.34935	FPKM1_group_24933_transcript_3	chr5:10207516-10208483	-	CCT5,CTD-2256P15.1	0.938804	0.863303
XLOC_055132	0.0961733		-0.718054	0.416029	0.822469	FPKM1_group_13135_transcript_2	chr17:62918302-62921609	-	LRRC37A3	0.938328	0.570425
XLOC_122299	0.0961733		-0.857353	-0.423513		FPKM1_group_31129_transcript_2	chr8:30518587-30518936	-	GTF2E2	0.110504	0.0609945
XLOC_007462	0.0961733		-2.19602	-0.817936	0.671973	FPKM1_group_1098_transcript_1	chr1:101455178-101552821	-	SLC30A7	0.125261	0.0273368
XLOC_014952	0.0961733		0.535206	0.400474	0.861281	FPKM1_group_3208_transcript_1	chr10:37768450-37770871	-	ZNF248	0.127032	0.184089
XLOC_049682	0.0961733		0.720537	0.4914	0.83217	FPKM1_group_11877_transcript_1	chr16:72424931-73093597	-	ZFHX3	0.0959757	0.158148
XLOC_076204	0.0961733		0.140213	0.275701	0.902654	LINC00654,RP5-1022P6.4,linc-PROKR2-4	chr20:5466185-5493123	-	GPCPD1	0.368142	0.405717
XLOC_008051	0.0961733		-1.03374	0.00766784		FPKM1_group_1336_transcript_1	chr1:119573093-119870538	-	ZNF697	0.338682	0.165426
XLOC_095967	0.0961733		nan	-0.803752		FPKM1_group_23768_transcript_1	chr4:104177315-104378509	-	CENPE	0.177139	0
XLOC_009393	0.0961733		1.98787	2.36733	0.0115698	FPKM1_group_1706_transcript_3	chr1:173354307-173354749	-	PRDX6	0.324662	1.28777
XLOC_097391	0.0961733		-0.28135	0.416925	0.855014	FPKM1_group_24435_transcript_3	chr4:169979207-169980185	-	PALLD	0.141186	0.116171
XLOC_102147	0.0961733		0.978758	0.106045		FPKM1_group_25427_transcript_1	chr5:58242292-58242562	-	FKSG52	0.0956992	0.188601
XLOC_097293	0.0961733		0.90397	0.545689	0.824165	FPKM1_group_24400_transcript_2	chr4:165675215-165724947	-	KLHL2	0.109612	0.205107
XLOC_031031	0.0961733		-1.10389	-0.857356	0.596643	FPKM1_group_6988_transcript_1	chr12:98996200-98997730	-	SLC25A3,SNORA53	0.539833	0.251163
XLOC_117037	0.0961733		inf	1.35506		FPKM1_group_29915_transcript_1	chr7:75741009-75741371	-	MDH2	0	0.307645
XLOC_043699	0.0961733		inf	0.439729		FPKM1_group_10213_transcript_1	chr15:53742433-53742709	-	WDR72	0	0.281703
XLOC_028002	0.0961733		-0.829652	-1.41688	0.0449463	FPKM1_group_5703_transcript_1	chr12:5517524-5520212	-	AKAP3	0.705407	0.396908
XLOC_098021	0.0961733		0.096075	-0.460451	0.422722	FPKM1_group_24736_transcript_3	chr4:190470112-190498185	-	FRG1	14.1326	15.1058
XLOC_012489	0.0961733		0.0160672	0.451068	0.676505	linc-ZNF485-2	chr10:43916036-43918820	+	HNRNPF	0.665645	0.6731
XLOC_001699	0.0963106	0.987142	-1.08962	-1.94333	0.112028	FPKM1_group_761_transcript_1	chr1:68027737-68056187	+	GADD45A	1.05757	0.496936
XLOC_107424	0.0965755	0.98536	-0.614886	-0.281265	0.749617	FPKM1_group_28371_transcript_7,linc-CENPW-2	chr6:126380719-126403972	+	TRMT11	0.88675	0.579031
XLOC_051240	0.0977115		-0.772342	0.497462	0.745623	FPKM1_group_12714_transcript_4	chr17:38051851-38057786	+	GSDMB	0.110749	0.0648398
XLOC_064304	-0.0977115		0.473759	0.509274		FPKM1_group_16227_transcript_2	chr2:62572844-62573103	+	B3GNT2	0.17957	0.249372
XLOC_000915	-0.0977115		0.4905	0.608339	0.67053	linc-PTPRU-2	chr1:29459861-29462475	+	FPKM1_group_351_transcript_3,RP11-242O24.3,SRSF4	0.0733485	0.10305
XLOC_035059	-0.0977115		-0.426708	0.653207	0.633608	RP11-318G21.4	chr13:78469615-79233314	-	RBM26	0.34279	0.255021
XLOC_077167	-0.0977115		0.0364652	-0.183035	0.945113	FPKM1_group_19226_transcript_1,RP4-644L1.2,linc-MAFB-1	chr20:39322710-39346184	-	MAFB	0.144842	0.14855
XLOC_038167	-0.0977115		-0.774776	-0.696157	0.636776	FPKM1_group_8648_transcript_2,RP11-1103G16.1,linc-PRKD1-1	chr14:30907197-31089269	-	SCFD1	0.395607	0.231224
XLOC_021337	-0.0977115		-0.62675	-0.564242	0.802114	FPKM1_group_4282_transcript_1	chr11:16799841-17074583	-	PIK3C2A,RPS13,SNORD14B	0.420618	0.272407
XLOC_016683	-0.0977115		-1.42156	-0.59625	0.743102	FPKM1_group_3828_transcript_6	chr10:103458812-103461038	-	FBXW4	0.147088	0.0549091
XLOC_089489	-0.0977115		2.99581	1.33056		FPKM1_group_22166_transcript_1	chr3:148508888-148677899	-	GYG1	0.013902	0.110893
XLOC_044747	-0.0977115		0.341631	-0.50761	0.724048	FPKM1_group_10660_transcript_1	chr15:82418896-82420654	-	MEX3B	0.248741	0.315202
XLOC_022786	-0.0977115		-0.215856	0.141277	0.95742	FPKM1_group_4746_transcript_2	chr11:64104657-64106064	-	CCDC88B	0.169731	0.146145
XLOC_121329	-0.0977115		1.32304	0.00328915		linc-ERICH1-7	chr8:1231014-1250862	-	ERICH1	0.0978129	0.244721
XLOC_073999	-0.0977115		nan	0.281642		FPKM1_group_18291_transcript_2	chr2:217536827-217861287	-	IGFBP2	0.172315	0
XLOC_030204	-0.0977115		inf	0.555677		FPKM1_group_6603_transcript_1	chr12:76537540-76537781	-	NAP1L1	0	0.204705
XLOC_044697	-0.0977115		-1.28942	-0.404961	0.845194	FPKM1_group_10627_transcript_1	chr15:81702685-81712084	-	TMC3	0.116362	0.0476057
XLOC_025387	-0.0980179	0.987142	0.336525	0.390899	0.599998	FPKM1_group_5719_transcript_4,RP1-102E24.8	chr12:6501804-6506299	+	SCNN1A	5.56953	7.0327
XLOC_098633	-0.0992682		0.361398	0.212589	0.85938	FPKM1_group_25294_transcript_1	chr5:43012799-43280952	+	SEPP1	1.82122	2.33967
XLOC_023498	-0.0992682		-0.420876	-0.287615	0.884072	FPKM1_group_4982_transcript_4	chr11:77850805-77925757	-	USP35	0.143045	0.10685
XLOC_132368	-0.0992682		1.05737	0.841262	0.212145	FPKM1_group_34742_transcript_3	chrX:73164158-73513409	+	CHIC1	11.1171	23.1363
XLOC_134222	-0.0992682		-0.641847	-0.672759	0.643284	FPKM1_group_34483_transcript_10,FPKM1_group_34483_transcript_9	chrX:45604588-45629677	-	KRBOX4	0.331823	0.212663
XLOC_094725	-0.0992682		-0.774257	-0.332431		FPKM1_group_23323_transcript_3,FPKM1_group_23323_transcript_6	chr4:48457877-48459041	-	SLAIN2	0.132313	0.0773619
XLOC_042621	-0.0992682		-0.29056	-0.0734618	0.976125	FPKM1_group_9806_transcript_1	chr15:25068793-25492435	-	UBE3A	0.108488	0.0886979
XLOC_036727	-0.0992682		nan	-0.528519		FPKM1_group_8895_transcript_1,LINC00640,linc-FRMD6-1,linc-FRMD6-2	chr14:51800110-51852321	+	TMX1	0.230602	0
XLOC_052353	-0.0992682		0.248118	0.0641167	0.968827	RP11-676J12.4	chr17:660336-695749	-	RNMTL1	0.703993	0.836102
XLOC_022563	-0.0992682		-2.23745	-0.916482	0.670587	FPKM1_group_4682_transcript_1,FPKM1_group_4682_transcript_2	chr11:59436784-59443514	-	PATL1	0.179203	0.038002
XLOC_104130	0.100795		-1.60494	-1.34403	0.0472037	FPKM1_group_26283_transcript_3,FPKM1_group_26283_transcript_4	chr5:127530254-127544668	-	KDELC1P1,SLC12A2	0.166381	0.0546977
XLOC_091660	-0.100858	0.983762	-0.302143	-0.202013	0.877482	RP11-539G18.2	chr4:39640759-39653692	+	UGDH	3.82857	3.10514
XLOC_073044	-0.101077		-0.691535	-0.827138	0.31272	FPKM1_group_17896_transcript_3,FPKM1_group_17896_transcript_4	chr2:186973140-186981623	-	ZC3H15	0.437916	0.271155
XLOC_040111	0.102204	0.986896	inf	2.35275	0.0667465	linc-CLMN-1	chr14:95805195-95806028	-	CLMN,CTD-2240H23.2	0	0.200371
XLOC_082435	0.102516	0.973606	-0.771949	-1.59855	0.100815	Z83851.1	chr22:42760405-42765242	-	TCF20	2.04786	1.19928
XLOC_058668	-0.102702	0.984142	-0.305852	0.140072	0.957622	-	chr18:71917754-71918315	-	CYB5A	0.702208	0.568062
XLOC_084998	0.103007	0.983001	inf	1.54449		RP11-167H9.4,RPL32P9,linc-TSC22D2-2	chr3:149478891-149942977	+	COMMD2	0	1.36968
XLOC_005053	0.103384	0.975465	0.567368	0.705051	0.647831	FPKM1_group_205_transcript_1	chr1:17011367-17011730	-	CROCC	1.07264	1.58945
XLOC_099815	-0.103893	0.972976	-1.21467	-1.93991	0.194813	CTB-113I20.2	chr5:133340837-133341253	+	VDAC1	1.91041	0.823144
XLOC_055876	0.104049		-0.78284	-1.20911	0.31681	-	chr17:79317986-79318791	-	SLC38A10	0.890695	0.517691
XLOC_048059	-0.104416		0.116293	0.49214	0.695861	FPKM1_group_11312_transcript_2	chr16:11896392-11897352	-	ZC3H7A	0.729839	0.791106
XLOC_063103	-0.104416		1.6227	0.833913	0.309881	FPKM1_group_14964_transcript_1	chr19:49721474-49726143	-	TRPM4	2.721	8.37934
XLOC_102224	-0.104416		0.215096	-1.03756	0.333239	FPKM1_group_25452_transcript_2	chr5:61927576-61928859	-	DIMT1	0.724666	0.841178
XLOC_059106	-0.105242	0.986267	-0.387593	0.227226	0.88119	CTD-2325M2.1	chr19:8073612-8080909	+	CTXN1	0.985124	0.753033
XLOC_072673	0.105391	0.982986	1.05531	0.458931	0.694105	FPKM1_group_17733_transcript_1,FPKM1_group_17734_transcript_1,FPKM1_group_17737_transcript_2,TU_0120899_0	chr2:180977911-181006347	-	CWC22	0.261211	0.54284
XLOC_020759	-0.107608		inf	0.555677		FPKM1_group_4170_transcript_1	chr11:1823771-1824038	-	CTSD,IFITM10,RP11-295K3.1	0	0.139177
XLOC_026202	-0.107608		0.245233	-0.110361	0.928494	linc-HNRNPA1-3	chr12:54530582-54555677	+	SMUG1	2.6592	3.1519
XLOC_122277	0.11067	0.976325	-0.102183	-0.350143	0.80118	RP11-51J9.5	chr8:29952913-30041156	-	DCTN6,LEPROTL1	3.63322	3.38478
XLOC_111554	-0.111079	0.98536	0.162817	-0.239894	0.933572	linc-C6orf192-1	chr6:133125512-133134602	-	RPS12	0.104641	0.117143
XLOC_065981	-0.111524		-0.794965	-0.905292	0.438953	FPKM1_group_17894_transcript_11	chr2:186895327-186965726	+	FSIP2	0.109093	0.0628764
XLOC_059166	0.111592	0.972976	-0.153254	-0.397622	0.654813	linc-UBL5-4	chr19:9630821-9650405	+	ZNF426	4.32503	3.88915
XLOC_116854	0.111869		0.195169	0.515341	0.747514	FPKM1_group_29837_transcript_5	chr7:66795256-66829655	-	SBDS	0.40031	0.458298
XLOC_115414	0.111869		0.332108	0.684158		FPKM1_group_29232_transcript_1	chr7:17222791-17223148	-	AHR	0.261155	0.328755
XLOC_021341	0.111869		-1.87802	-0.691774	0.753586	FPKM1_group_4284_transcript_3	chr11:16799841-17074583	-	PIK3C2A,RPS13,SNORD14B	0.224271	0.0610145
XLOC_007778	0.111869		-0.655995	-0.516244	0.828014	FPKM1_group_1227_transcript_3	chr1:111658095-111658715	-	CEPT1	0.187676	0.119106
XLOC_077242	0.111869		nan	-1.20227		FPKM1_group_19268_transcript_1,FPKM1_group_19268_transcript_5	chr20:42101765-42104786	-	SRSF6	0.251352	0
XLOC_007831	0.111869		-1.45551	-0.685971		FPKM1_group_1248_transcript_2	chr1:113361559-113362348	-	PPM1J,RHOC,RP11-426L16.10	0.163834	0.0597382
XLOC_021645	0.111869		0.383063	-0.130422	0.961586	FPKM1_group_4435_transcript_3,RP11-1L12.3,linc-SLC5A12	chr11:27062271-27241660	-	CCDC34	0.362008	0.472098
XLOC_117656	0.111869		-1.0092	-0.993342	0.150702	FPKM1_group_30094_transcript_3,FPKM1_group_30094_transcript_5	chr7:104581509-104653491	-	KMT2E	1.32998	0.660764
XLOC_116944	0.111869		0.886416	0.466359	0.483349	FPKM1_group_29876_transcript_3	chr7:73163424-73165581	-	ABHD11	2.21254	4.09005
XLOC_101040	0.111869		nan	-2.45722	0.0826475	CTD-2256P15.5	chr5:10269600-10270030	-	FAM173B	0.704159	0
XLOC_099338	0.111869		-0.606408	-0.442078	0.845194	FPKM1_group_25916_transcript_3	chr5:94798400-94799375	+	TTC37	0.217737	0.143016
XLOC_087826	0.111869		-1.13519	-1.54389	0.293127	FPKM1_group_21480_transcript_1	chr3:75710456-75711224	-	FRG2C	0.300682	0.136892
XLOC_020785	0.111869		inf	-0.313951		FPKM1_group_4184_transcript_1,FPKM1_group_4184_transcript_2	chr11:2345999-2346937	-	CD81,linc-CD81-1	0	0.120587
XLOC_107936	0.111869		-1.49373	-3.11861	0.00426934	-	chr6:168164774-168165036	+	MLLT4	3.98627	1.41549
XLOC_099450	0.111869		-0.701494	-0.839463	0.402581	FPKM1_group_26070_transcript_1	chr5:103463501-103465844	+	NUDT12	1.13196	0.696084
XLOC_022911	0.111869		0.782597	0.936363	0.378541	FPKM1_group_4786_transcript_1	chr11:65760946-65761709	-	BANF1	0.617357	1.06199
XLOC_118778	0.111869		2.47735	0.646011		FPKM1_group_30544_transcript_1	chr7:142734698-142735058	-	PIP	0.0589127	0.328069
XLOC_081798	0.111869		nan	-0.362225		FPKM1_group_20371_transcript_1	chr22:26910730-26911065	-	TFIP11	0.120241	0
XLOC_103880	0.111869		-1.76223	-1.26852	0.0673027	FPKM1_group_26183_transcript_2	chr5:116153719-116154686	-	AC010296.1,SEMA6A	2.16853	0.639266
XLOC_008962	0.111869		-2.79571	-1.34374	0.387456	FPKM1_group_1567_transcript_3	chr1:159931007-159949179	-	IGSF9	0.412052	0.0593416
XLOC_002972	0.111869		-2.0303	-1.98928		-	chr1:159956989-159957401	+	IGSF9	0.693726	0.169827
XLOC_088790	0.111869		-1.67761	-1.24595	0.191107	FPKM1_group_21905_transcript_1	chr3:123767525-123770010	-	KALRN,RP11-71H17.7	0.548026	0.171313
XLOC_113592	0.111869		0.232008	0.434079	0.752364	FPKM1_group_29837_transcript_2	chr7:66795256-66829655	+	SBDS	0.597128	0.701309
XLOC_124261	0.111869		-0.0286765	-0.531519	0.802114	FPKM1_group_32022_transcript_2	chr8:115686421-115686757	-	TRPS1	0.878606	0.861314
XLOC_133630	0.111869		1.08785	0.706188	0.693291	FPKM1_group_34214_transcript_1	chrX:10865995-11129261	-	HCCS	0.116743	0.248144
XLOC_029159	0.111869		inf	0.555677		FPKM1_group_6183_transcript_2	chr12:48343336-48343612	-	VDR	0	0.173169
XLOC_063439	0.111869		4.29622	1.56855		-	chr19:56144549-56144996	-	CCDC106,ZNF580,ZNF581	0.0373053	0.732929
XLOC_063368	0.111869		-0.432004	-0.727112	0.649255	CTD-2337J16.1	chr19:54753288-54753907	-	LILRA6,LILRB3	0.377051	0.279482
XLOC_062628	0.111869		nan	-1.61879		FPKM1_group_14840_transcript_1	chr19:39793570-39794066	-	CTC-246B18.8,LRFN1	0.275674	0
XLOC_052472	0.111869		0.65727	0.650644	0.715244	FPKM1_group_12174_transcript_1	chr17:3600972-3602393	-	P2RX5,P2RX5-TAX1BP3,TAX1BP3	0.147129	0.232037
XLOC_059271	0.111869		0.737538	0.0495117	0.985055	CTD-2666L21.1	chr19:12305829-12750912	+	ZNF136	1.04777	1.74698
XLOC_032090	0.111869		nan	0.600738		FPKM1_group_7434_transcript_1,FPKM1_group_7434_transcript_2	chr12:133345289-133532892	-	ZNF26	0.202957	0
XLOC_048025	0.111869		-0.675389	-0.110934	0.96413	FPKM1_group_11303_transcript_1	chr16:10835111-10836269	-	NUBP1	0.277461	0.173736
XLOC_136369	0.111869		1.74516	2.01423	0.00144649	-	chrX:124288031-124288716	-	STAG2	0.742194	2.48808
XLOC_048129	0.111869		0.976003	0.727705		FPKM1_group_11345_transcript_4	chr16:13772197-13782624	-	ERCC4	0.16977	0.333939
XLOC_027999	0.111869		-0.871525	-0.402082	0.779867	RP11-1038A11.2	chr12:5385994-5492819	-	AKAP3	0.288095	0.157464
XLOC_028645	0.111869		2.20962	0.233007		FPKM1_group_5966_transcript_3	chr12:27221775-27222685	-	FPKM1_group_5966_transcript_1,MED21	0.0599294	0.277206
XLOC_134149	0.111869		-0.14072	-0.281117	0.883812	FPKM1_group_34455_transcript_5	chrX:41100440-41101794	-	DDX3X	0.104387	0.0946864
XLOC_011373	0.111869		0.407567	0.552133	0.751668	FPKM1_group_2559_transcript_1	chr1:232295836-232321389	-	SIPA1L2	0.10147	0.134594
XLOC_127676	0.111869		-1.563	-0.80217		FPKM1_group_32664_transcript_1,FPKM1_group_32664_transcript_2	chr9:7780146-7781997	-	TMEM261	0.1025	0.0346908
XLOC_057843	0.111869		-0.547792	-0.449197	0.857016	FPKM1_group_13852_transcript_1	chr18:36786768-37380282	-	PIK3C3	0.112729	0.0771142
XLOC_056464	0.111869		0.0351842	-0.167634	0.937567	FPKM1_group_13879_transcript_2	chr18:36786768-37380282	+	TPGS2	0.202754	0.207759
XLOC_055256	0.111869		-0.120377	0.71122	0.563425	FPKM1_group_13205_transcript_1	chr17:66097808-66148609	-	AMZ2	0.758033	0.697351
XLOC_128824	0.111869		-0.126196	0.227228	0.872219	FPKM1_group_33062_transcript_2	chr9:45729016-45729466	-	FAM27D1	6.50568	5.96079
XLOC_035688	0.111869		-1.33213	-1.48766	0.320877	FPKM1_group_8445_transcript_1	chr13:111568662-111569803	-	ANKRD10	0.221486	0.0879705
XLOC_051530	0.111869		-3.41404	-0.113136	0.972444	CTD-2377D24.6	chr17:46760728-46784708	+	PRAC1	0.115496	0.0108352
XLOC_049688	0.111869		0.240027	0.460746	0.744156	FPKM1_group_11879_transcript_8	chr16:72424931-73093597	-	ZFHX3	0.444067	0.52445
XLOC_029825	0.111869		0.930122	0.40741	0.827043	FPKM1_group_6387_transcript_1	chr12:65382871-65384717	-	LEMD3	0.120233	0.229097
XLOC_026145	0.111869		0.316072	0.544293	0.759488	linc-KRT7-1	chr12:52604708-52617595	+	KRT80	0.456441	0.568241
XLOC_109709	0.111869		-0.895657	-0.821838	0.356687	FPKM1_group_27601_transcript_1	chr6:44062038-44063304	-	TMEM63B	1.56014	0.838581
XLOC_037722	0.111869		1.68908	0.439729		FPKM1_group_8485_transcript_3	chr14:19432827-19450621	-	CTD-2292M16.8,FPKM1_group_8501_transcript_3,FPKM1_group_8501_transcript_4,TTC5	0.0497178	0.160316
XLOC_015472	0.111869		0.632312	0.678759	0.554107	FPKM1_group_3380_transcript_1,FPKM1_group_3380_transcript_2,FPKM1_group_3380_transcript_3	chr10:63857530-63860744	-	RTKN2	0.517607	0.802316
XLOC_074045	0.111869		1.98912	0.159408		FPKM1_group_18314_transcript_3	chr2:219275677-219275990	-	CTDSP1	0.0572939	0.227454
XLOC_030593	0.111869		-1.79759	-0.2652	0.930009	FPKM1_group_6810_transcript_2	chr12:92127834-92128235	-	BTG1,C12orf79	0.604942	0.174014
XLOC_000276	0.111869		2.90336	1.33162	0.250388	RP1-69M21.2	chr1:11669587-11673412	+	FBXO44	0.0628966	0.47057
XLOC_042931	0.111869		1.20206	1.22194	0.0480948	-	chr15:34430366-34430866	-	PGBD4	3.2038	7.3709
XLOC_127255	0.111869		1.08997	0.112085	0.963855	RP11-98L5.2,linc-LCN9	chr9:138466770-138478958	+	C9orf116	0.0983626	0.209385
XLOC_043899	0.111869		inf	0.616855		RP11-507B12.2	chr15:61592524-61927648	-	RORA	0	0.147292
XLOC_037171	0.111869		-0.0267733	-0.77425	0.579693	-	chr14:77495310-77495837	+	IRF2BPL	2.02723	1.98995
XLOC_083184	0.11292		1.99579	1.78907	0.234815	-	chr3:23659889-23660480	+	UBE2E1	0.0541884	0.216122
XLOC_077945	-0.113467		2.13778	2.64843	0.000392458	FPKM1_group_19637_transcript_1	chr20:56215843-56219592	-	PMEPA1	0.0368937	0.162364
XLOC_058359	-0.113467		-0.150054	-0.216543	0.934789	FPKM1_group_14093_transcript_4	chr18:55265105-55266418	-	FECH	0.16537	0.149034
XLOC_005455	-0.113467		-0.182497	-0.0384111	0.991835	FPKM1_group_346_transcript_1	chr1:28975357-28976058	-	TAF12	0.395932	0.348886
XLOC_071227	-0.113467		0.936765	0.681038	0.68202	FPKM1_group_17165_transcript_3	chr2:128658095-128659647	-	AMMECR1L	0.0779837	0.149279
XLOC_094375	-0.113467		-0.798399	-0.589758	0.681215	FPKM1_group_23191_transcript_2,FPKM1_group_23191_transcript_4	chr4:34122218-34336970	-	RELL1	0.88755	0.51033
XLOC_037925	-0.113467		-0.297077	-0.219563	0.935009	FPKM1_group_8555_transcript_2	chr14:23338677-23339269	-	LRP10	0.48919	0.398152
XLOC_124665	-0.113467		-3.00741	-2.95143	0.00931341	FPKM1_group_32220_transcript_1,FPKM1_group_32220_transcript_3	chr8:128301987-128507179	-	MYC	0.42894	0.0533427
XLOC_061978	-0.113467		-0.533741	-0.204931	0.916293	CTB-175P5.4	chr19:23582034-23598877	-	ZNF91,linc-ZNF99-5	0.276963	0.191315
XLOC_072703	0.114963		-0.896654	-0.333848	0.896197	FPKM1_group_17748_transcript_1	chr2:181304871-181305932	-	CWC22	0.143757	0.0772165
XLOC_112142	0.114963		0.0909507	1.04572	0.479488	FPKM1_group_28718_transcript_1	chr6:151186684-151549582	-	AKAP12	0.150631	0.160433
XLOC_127124	0.115358	0.969722	0.140244	-0.148016	0.85873	LINC00963,RP11-492E3.51	chr9:132245729-132275965	+	NTMT1	25.634	28.251
XLOC_078433	0.116367		1.41225	0.788511	0.343406	FPKM1_group_19811_transcript_2	chr21:11166880-11168683	+	BAGE2,TPTE	1.80646	4.80793
XLOC_116296	-0.117028	0.970982	0.189281	-0.163525	0.870221	SNHG15	chr7:45022621-45026560	-	CCM2	181.795	207.282
XLOC_089303	0.117477	0.979944	-0.12328	-0.232991	0.857396	FPKM1_group_22081_transcript_1	chr3:139108652-139396859	-	RBP2	1.14815	1.05411
XLOC_109058	-0.117742	0.984989	-0.0838741	0.14818	0.863734	-	chr6:28389195-28394735	-	ZSCAN23	3.25264	3.06893
XLOC_048787	-0.117927	0.982986	-0.289612	-0.221828	0.866128	BMS1P8,FPKM1_group_11553_transcript_1	chr16:33489491-33500971	-	ZNF267,ZNF720	1.37835	1.12766
XLOC_063959	0.119189	0.979368	0.558791	0.929861	0.334585	FPKM1_group_15646_transcript_1	chr2:28931652-28959859	+	PPP1CB,SPDYA	0.199197	0.293425
XLOC_056509	0.119755	0.982325	nan	0.485952		FPKM1_group_13981_transcript_2	chr18:44812092-45120916	+	HDHD2,IER3IP1	0.524638	0
XLOC_016730	0.120346		-0.0831911	0.51012	0.642264	FPKM1_group_3846_transcript_3	chr10:104662055-104665919	-	CNNM2	0.183629	0.17334
XLOC_074821	0.120346		0.513255	0.328876	0.760223	FPKM1_group_18670_transcript_1	chr2:242823513-243026749	-	NEU4	0.867382	1.23799
XLOC_080169	0.121016	0.983906	-1.39513	-0.0990516	0.97538	-	chr21:45551473-45551788	-	C21orf33	1.08395	0.412129
XLOC_126094	0.122079	0.984287	-0.433015	-0.66928		RP11-211N8.2	chr9:46842615-46846025	+	FAM27D1	0.140935	0.104392
XLOC_100751	-0.12309	0.984462	-0.135585	-0.472364	0.601112	CTD-2012J19.3	chr5:1568636-1634120	-	LPCAT1	17.8074	16.2101
XLOC_084810	-0.123253		-0.578244	-0.360675	0.814494	FPKM1_group_22068_transcript_1	chr3:138363666-138365757	+	FAIM	0.358599	0.240182
XLOC_011849	-0.123629	0.981005	0.668755	0.762933	0.0814313	FPKM1_group_2729_transcript_2,FPKM1_group_2729_transcript_3,FPKM1_group_2730_transcript_1,MIR3916,RP11-488L18.8	chr1:247349812-247405125	-	ZNF124	26.7053	42.4534
XLOC_117920	-0.123941		-0.157851	0.831165	0.371858	AC018464.3,FPKM1_group_30191_transcript_3	chr7:112594691-112635689	-	C7orf60	0.836059	0.749409
XLOC_103955	-0.124532	0.979368	0.225685	-0.0597801	0.967364	-	chr5:118603583-118604253	-	TNFAIP8	5.34688	6.25229
XLOC_065288	-0.124889	0.983906	-0.172862	0.865683	0.608523	FPKM1_group_17194_transcript_1	chr2:130741419-130742395	+	POTEF	0.420532	0.373046
XLOC_127664	-0.125148		-0.462856	-0.267737	0.835335	FPKM1_group_32657_transcript_1	chr9:6688439-6689402	-	KDM4C,RP11-390F4.3	1.23143	0.893465
XLOC_046966	-0.125148		-0.0796677	0.245697	0.905064	FPKM1_group_11847_transcript_1	chr16:72424931-73093597	+	TXNL4B	0.124422	0.117737
XLOC_028377	-0.125148		-0.258567	0.912579		FPKM1_group_5824_transcript_2	chr12:15064978-15065421	-	WBP11	0.11409	0.0953696
XLOC_061932	-0.125148		0.780884	1.35009	0.000205516	-	chr19:22387103-22398541	-	ZNF676	1.94272	3.33796
XLOC_044694	-0.125148		0.0887487	-0.228573	0.85903	FPKM1_group_10625_transcript_2	chr15:81679852-81682219	-	TMC3	1.26805	1.3485
XLOC_069111	-0.125148		-0.151217	0.39066	0.759566	FPKM1_group_16206_transcript_2	chr2:61698322-61765761	-	USP34	0.502022	0.452066
XLOC_002741	-0.125148		3.72819	3.46972	5.97504e-10	FLG-AS1,FPKM1_group_1490_transcript_2	chr1:152140600-152339163	+	S100A11	0.0466532	0.618271
XLOC_087310	-0.125148		-0.0495901	-0.15625	0.962164	FPKM1_group_21248_transcript_1	chr3:57928311-57929136	-	FLNB	0.176278	0.170321
XLOC_045138	-0.125148		-2.10284	0.067501		FPKM1_group_10835_transcript_1	chr15:91396550-91396965	-	FURIN	0.201146	0.0468267
XLOC_031429	-0.125148		0.602094	0.327672	0.866619	FPKM1_group_7142_transcript_5	chr12:112355526-112357528	-	MAPKAPK5	0.106473	0.161617
XLOC_038382	-0.125148		1.19146	1.38773	0.253995	FPKM1_group_8724_transcript_3	chr14:38059188-38672287	-	FPKM1_group_8701_transcript_1,FPKM1_group_8708_transcript_3,FPKM1_group_8711_transcript_2,FPKM1_group_8712_transcript_1,TTC6,linc-SSTR1-1,linc-SSTR1-2,linc-SSTR1-3,linc-SSTR1-4	0.0569134	0.129981
XLOC_084789	-0.125148		0.435825	0.275017	0.827014	FPKM1_group_22041_transcript_1	chr3:135934794-135955888	+	MSL2	9.45809	12.7938
XLOC_071692	-0.125148		-0.764196	-1.24014	0.260506	FPKM1_group_17336_transcript_2	chr2:148602085-149278959	-	EPC2	0.184947	0.108893
XLOC_028848	-0.125148		-0.844706	-0.306434	0.815808	TU_0078290_0,TU_0078296_0	chr12:32257050-32536567	-	FGD4	1.11712	0.62204
XLOC_007461	-0.125148		-0.487932	-0.319867	0.811887	FPKM1_group_1097_transcript_1,FPKM1_group_1097_transcript_3,FPKM1_group_1097_transcript_4	chr1:101455178-101552821	-	SLC30A7	0.399149	0.284612
XLOC_023334	0.125327		0.393927	0.486774	0.662618	FPKM1_group_4940_transcript_2	chr11:73475726-73477104	-	RAB6A	0.293217	0.385278
XLOC_007018	0.12596		0.888971	1.69841	0.00570834	FPKM1_group_946_transcript_1	chr1:84041194-84326706	-	TTLL7	0.44129	0.817205
XLOC_012782	-0.126057		-0.198202	0.104833	0.962154	FPKM1_group_3441_transcript_2	chr10:70021699-70025185	+	HNRNPH3	0.122948	0.107166
XLOC_047010	-0.126057		-0.904992	-0.470372	0.750053	FPKM1_group_11913_transcript_1,FPKM1_group_11913_transcript_2,RP11-252A24.5	chr16:74456017-74470867	+	PSMD7	0.496447	0.26512
XLOC_101128	-0.126057		2.57927	3.32138	1.35182e-10	FPKM1_group_24962_transcript_3	chr5:12574968-12804475	-	DNAH5	0.184173	1.10068
XLOC_008386	-0.126057		1.1854	0.231759	0.858618	FPKM1_group_1439_transcript_1,FPKM1_group_1439_transcript_2,FPKM1_group_1439_transcript_3	chr1:147013181-147100871	-	ACP6	0.717456	1.63169
XLOC_059932	-0.126057		0.580626	1.28693	0.288927	linc-ZNF567	chr19:37168289-37178351	+	ZNF567	0.175298	0.262158
XLOC_039063	-0.126057		1.04642	0.448937	0.78874	FPKM1_group_9064_transcript_3	chr14:57926948-57927904	-	NAA30	0.068653	0.141796
XLOC_057504	-0.126057		-0.84736	0.40898	0.857836	FPKM1_group_13721_transcript_2	chr18:20279308-20606451	-	TMEM241	0.116692	0.0648574
XLOC_089630	-0.126057		1.28362	1.1317	0.515781	FPKM1_group_22236_transcript_1	chr3:152785726-152786172	-	RAP2B	0.17526	0.42667
XLOC_008996	-0.126057		-2.12318	-1.21278	0.448502	FPKM1_group_1578_transcript_1	chr1:160952372-160952852	-	F11R,TSTD1	1.02017	0.23417
XLOC_124656	-0.127179		-2.79859	-2.81848	7.79581e-05	FPKM1_group_32213_transcript_2,FPKM1_group_32213_transcript_3	chr8:128128655-128241550	-	MYC	0.528024	0.0758918
XLOC_038979	0.127387	0.969722	-0.197993	-0.573551	0.435731	KTN1-AS1,linc-TBPL2-3	chr14:55964854-56239921	-	KTN1	2.66418	2.32254
XLOC_121421	-0.128376	0.962152	0.627564	-0.282664	0.756736	FPKM1_group_30809_transcript_2,RP11-115C21.2,linc-CSMD1-1	chr8:6260900-6565730	-	AGPAT5	5.6927	8.79497
XLOC_051195	-0.128813	0.972685	-0.143356	-0.531661	0.463554	CTB-58E17.1	chr17:36858704-36886056	+	AC006449.1	4.87217	4.41132
XLOC_101785	-0.129515		-0.34549	-0.249078	0.804101	CTD-2127H9.1,FPKM1_group_25249_transcript_1,FPKM1_group_25253_transcript_1,FPKM1_group_25253_transcript_2	chr5:38736156-38845931	-	OSMR	0.842311	0.662933
XLOC_037225	0.130589		-1.46014	-1.45385	0.378551	CTD-2341M24.1,FPKM1_group_9395_transcript_10,FPKM1_group_9411_transcript_1,linc-GPR65-6	chr14:86378384-86596803	+	SPATA7	0.20463	0.0743741
XLOC_058673	-0.131281	0.964035	0.289898	0.024605	0.984838	LINC00909	chr18:72259009-72777627	-	ZADH2	4.20682	5.14306
XLOC_002230	-0.133612		1.03243	0.921719	0.639532	FPKM1_group_1244_transcript_1	chr1:113258292-113260434	+	PPM1J,RHOC,RP11-426L16.10	0.0619677	0.126753
XLOC_025711	-0.133612		-1.4141	-0.849178		RP11-268P4.5	chr12:22754358-22777949	+	ETNK1	0.140324	0.0526556
XLOC_016600	-0.133612		-0.239969	-0.693683	0.323585	FPKM1_group_3800_transcript_2,FPKM1_group_3800_transcript_3	chr10:101190947-101197874	-	GOT1	2.73919	2.31945
XLOC_027411	-0.133612		-0.794013	-1.01743		FPKM1_group_7144_transcript_1	chr12:112547323-112547615	+	NAA25	0.191353	0.11036
XLOC_025364	-0.133612		-0.583969	-1.13744	0.101227	RP11-319E16.2	chr12:5385994-5492819	+	AKAP3	0.591359	0.394511
XLOC_078400	0.135066		-0.0318943	0.503987	0.662618	linc-POTED-6	chr21:10206071-10208330	+	BAGE2,TPTE	2.7816	2.72078
XLOC_004502	0.135066		-2.03388	-0.655959		FPKM1_group_8_transcript_1	chr1:762987-794826	-	AL669831.1	0.36595	0.0893639
XLOC_097081	0.135066		-0.444927	0.0726546	0.973948	-	chr4:152318495-152319546	-	FAM160A1,RP11-164P12.4,linc-ARFIP1-8	0.505878	0.371629
XLOC_047416	-0.13742	0.96521	0.295327	0.158736	0.933759	-	chr16:89633934-89634400	+	RPL13	1.38775	1.70299
XLOC_007858	0.13767		-1.29203	0.0458916	0.983439	FPKM1_group_1260_transcript_2,FPKM1_group_1260_transcript_4	chr1:113454383-113542223	-	LRIG2,linc-MAGI3	0.263362	0.107551
XLOC_111745	-0.138342	0.982171	-0.110029	-0.475223	0.566689	-	chr6:138477387-138479783	-	KIAA1244	1.06004	0.982202
XLOC_056243	-0.138458		-0.443311	-0.988654	0.024772	ANKRD20A5P,FPKM1_group_13654_transcript_1,RP11-757O6.1	chr18:14179095-14253256	+	ZNF519	14.1747	10.4247
XLOC_124002	-0.139839	0.962488	0.815981	0.822494	0.0632314	FPKM1_group_31894_transcript_1,KB-1562D12.1	chr8:102472254-102681954	-	GRHL2	5.70456	10.0428
XLOC_053430	0.140359	0.979022	-0.26111	-0.237175	0.8049	RP11-173M1.4	chr17:25660281-25676048	-	WSB1	1.01712	0.848728
XLOC_020786	-0.141111		-1.91665	-2.36221	0.071218	AC129929.5,FPKM1_group_4185_transcript_2,linc-C11orf21-1	chr11:2349144-2418649	-	TSSC4	0.158654	0.0420225
XLOC_134302	-0.141111		-0.316386	-0.0300091	0.989066	FPKM1_group_34496_transcript_1	chrX:46993660-46995283	-	RBM10	0.808826	0.649551
XLOC_099009	-0.141111		0.673589	0.35184	0.831095	CTC-366B18.4	chr5:74902445-74906582	+	COL4A3BP	0.43992	0.701689
XLOC_041783	-0.141111		-2.18888	0.303792	0.899097	NR2E3,linc-NR2E3-1	chr15:72084976-72110600	+	SENP8	0.18274	0.0400787
XLOC_091769	-0.141111		0.0418388	-0.301853	0.889411	FPKM1_group_23314_transcript_2	chr4:47841937-47846867	+	NIPAL1	0.845738	0.870624
XLOC_038412	-0.141111		-0.0433115	0.135002	0.964985	FPKM1_group_8735_transcript_5	chr14:39699434-39856306	-	FBXO33	0.240653	0.233536
XLOC_073157	-0.141111		-1.26023	-2.70197	0.0247556	FPKM1_group_17926_transcript_1,FPKM1_group_17926_transcript_3	chr2:187247626-187248956	-	ZC3H15	0.255982	0.106866
XLOC_058683	-0.141612		2.25272	1.64756	0.23667	FPKM1_group_14238_transcript_1	chr18:73040959-73044091	-	TSHZ1	0.0765122	0.364641
XLOC_002795	-0.142072	0.957775	-0.338921	-0.50803	0.519376	RP11-422P24.11	chr1:153931574-153951636	+	CRTC2	2.17455	1.71927
XLOC_062279	-0.142737	0.970117	2.66559	3.03036	6.12228e-15	linc-ANKRD27	chr19:33177953-33182862	-	NUDT19	2.22002	14.0857
XLOC_121019	0.144135	0.976863	-1.33967	-1.73677	0.0012144	FPKM1_group_32215_transcript_2	chr8:128128655-128241550	+	FAM84B	0.241503	0.0954204
XLOC_042099	-0.144197	0.981005	0.590188	-0.38263	0.863725	-	chr15:89089962-89090545	+	DET1,MRPL46,RP11-97O12.6,RP11-97O12.7	0.704547	1.06066
XLOC_098534	-0.144459		-0.180317	0.441389	0.664959	FPKM1_group_25190_transcript_9	chr5:33484244-33487769	+	TARS	0.273241	0.241138
XLOC_009550	-0.144459		0.750775	0.745811	0.665944	FPKM1_group_1760_transcript_2	chr1:179047864-179048695	-	TOR3A	0.200028	0.336586
XLOC_079022	0.144889	0.980821	0.472766	1.15654	0.0936352	-	chr21:48003276-48004583	+	PRMT2	0.376329	0.522258
XLOC_082249	0.145148		0.458438	-0.551685	0.754427	FPKM1_group_20541_transcript_3	chr22:38222563-38223690	-	EIF3L	0.669141	0.919435
XLOC_049606	0.145148		-0.265832	0.855957	0.702866	FPKM1_group_11846_transcript_5	chr16:72424931-73093597	-	ZFHX3	0.206056	0.17138
XLOC_013017	0.145148		-0.213933	-0.200307	0.919678	FPKM1_group_3577_transcript_1,FPKM1_group_3577_transcript_2	chr10:81806003-81852548	+	ANXA11	1.83524	1.58231
XLOC_086800	0.145148		-0.52841	-0.602546	0.669663	FPKM1_group_21106_transcript_1	chr3:40334033-40334749	-	EIF1B	1.04222	0.722587
XLOC_003410	0.145181		0.256665	-0.596082	0.654723	FPKM1_group_1820_transcript_2,linc-C1orf21-2	chr1:184088835-184091816	+	FPKM1_group_1817_transcript_1,TSEN15	0.569728	0.680662
XLOC_093106	0.145439	0.975106	0.746501	0.578506	0.643657	FPKM1_group_24399_transcript_1,FPKM1_group_24402_transcript_1,RP11-294O2.2	chr4:165675215-165724947	+	KLHL2	0.248165	0.416351
XLOC_119292	0.145466	0.975923	-0.335167	-0.0176129	0.988539	RP11-91J19.4	chr8:424454-427966	+	FBXO25	2.93124	2.32357
XLOC_083523	-0.147984		0.537442	0.134805	0.940926	FPKM1_group_21199_transcript_2	chr3:48544138-48547657	+	SHISA5	0.120743	0.175247
XLOC_137578	0.148592	0.964776	-0.769393	-0.00625584	0.998577	-	chrY:2802447-2802834	-	ZFY	0.720805	0.422871
XLOC_091217	0.149221		-0.312177	-0.360862	0.751122	linc-MAN2B2-2	chr4:6315485-6319667	+	WFS1	0.790128	0.636389
XLOC_107317	-0.149615	0.972738	-0.776356	-0.449541	0.83039	FPKM1_group_28237_transcript_1,RP3-399L15.3,linc-NT5DC1-3	chr6:114254191-114793119	+	MARCKS	0.411867	0.240464
XLOC_102571	-0.150292	0.954711	0.107014	0.150298	0.853719	RP11-136K7.2	chr5:70628839-70743159	-	BDP1,MCCC2,linc-MCCC2	19.1413	20.6151
XLOC_067602	0.150761		-1.26934	-0.366765	0.868844	FPKM1_group_15476_transcript_3,FPKM1_group_15476_transcript_5	chr2:19166000-19546509	-	TTC32	0.33668	0.139672
XLOC_028042	0.150986		-1.7495	-2.21985	0.102998	FPKM1_group_5721_transcript_1	chr12:6581022-6581855	-	VAMP1	0.273097	0.0812201
XLOC_110132	-0.151917		-0.858055	-0.50824	0.789462	FPKM1_group_27751_transcript_2,FPKM1_group_27751_transcript_4	chr6:71897276-72130522	-	OGFRL1	0.196186	0.108235
XLOC_105388	0.152074		1.32804	0.877687	0.460612	RP11-844P9.2	chr5:175564159-175643216	-	SIMC1	0.1498	0.376089
XLOC_078158	0.152074		-1.96366	-0.00398438	0.998889	FPKM1_group_19745_transcript_3,FPKM1_group_19745_transcript_4,FPKM1_group_19745_transcript_7	chr20:58662852-59102516	-	CDH26	0.390074	0.100006
XLOC_126040	-0.152082	0.979944	-0.267003	0.0509697	0.985055	RP11-475I24.3	chr9:44400716-44404440	+	BX088651.2	0.364001	0.302501
XLOC_052269	0.153399	0.979625	-0.303111	-0.250272	0.918467	-	chr17:80025154-80025704	+	DUS1L	0.717813	0.58179
XLOC_001467	0.154238		0.509576	1.05631	0.41295	-	chr1:51813512-51814056	+	TTC39A	0.37015	0.526957
XLOC_042852	0.155132	0.979472	-0.870768	0.0110002	0.996248	AC123768.4	chr15:32898618-32932298	-	ARHGAP11A,RP11-1000B6.5	0.441824	0.241614
XLOC_030937	0.156049		-0.486327	1.159	0.333709	FPKM1_group_6946_transcript_1	chr12:96189122-96252617	-	SNRPF	0.109928	0.0784707
XLOC_036295	0.156049		1.03853	0.779553	0.546956	FPKM1_group_8642_transcript_1,linc-G2E3-2	chr14:29619940-29636919	+	PRKD1	0.323426	0.664359
XLOC_038986	0.156049		-0.179132	-0.430432	0.87	FPKM1_group_9017_transcript_2	chr14:55964854-56239921	-	KTN1	0.101156	0.0893444
XLOC_105652	0.156049		-1.24984	-0.72162	0.691514	RP11-532F6.4,linc-FOXQ1-2	chr6:693956-750729	+	EXOC2	0.444885	0.187072
XLOC_031498	0.156049		1.97788	1.36647		FPKM1_group_7172_transcript_1	chr12:115145784-115146270	-	TBX3	0.0370842	0.14608
XLOC_006836	0.156049		-0.264163	-0.17571	0.936641	FPKM1_group_855_transcript_2,FPKM1_group_855_transcript_4	chr1:75166579-75168217	-	TYW3	0.344339	0.286725
XLOC_104511	0.156049		-1.91986	-1.65752	0.193077	FPKM1_group_26424_transcript_2	chr5:139536903-139553608	-	PFDN1	0.144353	0.0381497
XLOC_033606	0.156049		-0.286087	-0.00448888	0.998889	FPKM1_group_7544_transcript_1	chr13:25801563-25802245	-	MTMR6	0.186578	0.153017
XLOC_108276	0.156049		1.03917	0.706188	0.693291	FPKM1_group_27048_transcript_2	chr6:8435890-8609623	-	SLC35B3	0.0957878	0.196848
XLOC_034224	0.156049		-0.897868	-0.828531	0.627884	FPKM1_group_7810_transcript_1	chr13:46526286-46528308	-	ZC3H13	0.114919	0.0616748
XLOC_006762	0.156049		inf	-0.382108		FPKM1_group_822_transcript_1	chr1:71547006-72748417	-	ZRANB2	0	0.199625
XLOC_034435	0.156049		-0.00352792	0.514979	0.778054	FPKM1_group_7865_transcript_1	chr13:50598522-51423190	-	RNASEH2B	0.314573	0.313804
XLOC_016457	0.156049		-1.98744	-1.83107	0.00111953	FPKM1_group_3758_transcript_1	chr10:96426022-96439039	-	CYP2C18,CYP2C19,CYP2C9	1.39361	0.351449
XLOC_015678	0.156049		-1.62631	-1.04416	0.41295	FPKM1_group_3468_transcript_1	chr10:71290666-71293568	-	TSPAN15	0.382298	0.123832
XLOC_076802	0.156049		0.662678	-0.35088	0.876262	FPKM1_group_19082_transcript_4,FPKM1_group_19082_transcript_5	chr20:30758074-30760205	-	PLAGL2	0.194643	0.308123
XLOC_040239	0.156049		1.88342	1.47981	0.365541	FPKM1_group_9561_transcript_3	chr14:100146992-100148469	-	CYP46A1	0.0377786	0.139384
XLOC_008273	0.156049		-0.957224	-0.296262	0.820963	-	chr1:143118703-143467715	-	NBPF8	4.59015	2.36414
XLOC_084971	0.156049		-0.700231	-1.6698	0.279911	FPKM1_group_22172_transcript_2	chr3:149105050-149108005	+	TM4SF1	0.126375	0.0777804
XLOC_088936	0.156049		-0.581668	0.12642	0.952949	FPKM1_group_21959_transcript_2,FPKM1_group_21959_transcript_3	chr3:127768150-127769283	-	SEC61A1	0.81097	0.541883
XLOC_058407	0.156049		2.62822	2.00054	0.0652249	FPKM1_group_14112_transcript_3	chr18:56444535-56447385	-	ZNF532	0.0452619	0.279836
XLOC_061054	0.156049		1.37903	0.282849		FPKM1_group_14320_transcript_1	chr19:2066521-2066823	-	IZUMO4	0.0794504	0.206645
XLOC_021963	0.156049		-0.0062025	-0.117604	0.92762	FPKM1_group_4569_transcript_4	chr11:38222267-38358630	-	C11orf74	3.19106	3.17737
XLOC_087026	0.156049		-0.136197	0.123198	0.967845	FPKM1_group_21186_transcript_1	chr3:47520470-47520980	-	SCAP	0.515354	0.468928
XLOC_055894	0.156049		1.38291	1.59514	0.323585	FPKM1_group_13479_transcript_1	chr17:79696033-79696323	-	MRPL12,SLC25A10	0.383809	1.00095
XLOC_061125	0.156049		-0.61365	-0.657944	0.74428	FPKM1_group_14340_transcript_2	chr19:3356647-3357710	-	NFIC	0.265351	0.173418
XLOC_067930	0.156049		-2.03806	-0.481213	0.828222	FPKM1_group_15630_transcript_1,FPKM1_group_15630_transcript_4	chr2:27921151-27922430	-	SUPT7L	0.194108	0.0472636
XLOC_068458	0.156049		0.293942	0.479434	0.791	FPKM1_group_15858_transcript_2	chr2:38150329-38408997	-	ATL2	1.61911	1.985
XLOC_070194	0.156049		-0.630149	-0.727246	0.650618	FPKM1_group_16696_transcript_1	chr2:91758044-91768920	-	RPIA	0.899229	0.581
XLOC_072078	0.156049		-0.0395839	0.48183	0.660835	FPKM1_group_17494_transcript_1	chr2:157093572-157095367	-	GPD2	0.286821	0.279058
XLOC_072443	0.156049		nan	0.509274		FPKM1_group_17630_transcript_1	chr2:173030682-173030948	-	DLX2	0.289239	0
XLOC_072695	0.156049		-0.784187	-0.668708	0.646047	FPKM1_group_17743_transcript_1	chr2:181283703-181285057	-	CWC22	0.528494	0.306885
XLOC_074055	0.156049		-0.0502469	-0.0885356	0.96706	FPKM1_group_18317_transcript_1	chr2:219624968-219625873	-	TTLL4	0.622522	0.601214
XLOC_081996	0.156049		-0.484711	0.0826356	0.961688	FPKM1_group_20434_transcript_4	chr22:31677578-31742218	-	AC005003.1	0.273018	0.195109
XLOC_039164	0.156049		-2.98443	-1.88116	0.173119	FPKM1_group_9110_transcript_1,FPKM1_group_9110_transcript_2	chr14:61565251-61566954	-	RP11-193F5.4,TRMT5	0.178448	0.0225481
XLOC_093890	0.156049		0.23791	0.0779031	0.975685	FPKM1_group_22928_transcript_1	chr4:13329407-13329918	-	RAB28	1.0615	1.25181
XLOC_053991	0.156049		1.61484	0.0677901		FPKM1_group_12717_transcript_1	chr17:38109357-38110215	-	ORMDL3	0.052369	0.160395
XLOC_042523	0.156049		-1.80814	-0.780668	0.631639	linc-POTEB-2	chr15:22541417-22546063	-	TUBGCP5	0.145181	0.0414577
XLOC_101863	0.156049		2.44321	0.873006	0.648981	FPKM1_group_25283_transcript_1	chr5:42912740-42913373	-	SEPP1	0.0454362	0.247105
XLOC_101634	0.156049		0.485252	0.75607	0.683087	FPKM1_group_25190_transcript_4	chr5:33469823-33482242	-	TARS	0.224518	0.314288
XLOC_045443	0.156049		-0.115677	-0.690228	0.536109	FPKM1_group_11014_transcript_7	chr15:97976949-97977401	-	LINC00923	3.58642	3.31009
XLOC_100962	0.156049		3.44599			FPKM1_group_24912_transcript_4	chr5:8822381-8823243	-	FASTKD3	0.0127523	0.138974
XLOC_045601	0.156049		-1.60294	-0.853803	0.682728	-	chr15:101690706-101691124	-	CHSY1	0.616196	0.202855
XLOC_014949	0.156049		-0.945959	0.215568	0.939972	FPKM1_group_3207_transcript_7	chr10:37760990-37762906	-	ZNF248	0.126849	0.0658455
XLOC_094223	0.156049		-1.21294	-1.7594	0.226129	RP13-494C23.1,linc-SEL1L3	chr4:25749054-25931435	-	SMIM20	0.320462	0.138244
XLOC_047909	0.156049		1.17753	1.0816	0.545069	FPKM1_group_11258_transcript_1	chr16:9157222-9158714	-	C16orf72	0.20434	0.462195
XLOC_049482	0.156049		-0.446787	0.179422	0.934367	FPKM1_group_11812_transcript_4	chr16:69591410-69596415	-	NFAT5,RP11-311C24.1	0.126428	0.0927568
XLOC_049551	0.156049		1.24745	0.889069	0.602701	FPKM1_group_11830_transcript_4	chr16:71853726-71856386	-	AP1G1	0.207193	0.491918
XLOC_095639	0.156049		0.669785	-0.0948206	0.979211	FPKM1_group_23658_transcript_2	chr4:83263408-83263774	-	HNRNPD	0.32867	0.52286
XLOC_008039	0.156049		-0.422589	-0.436039	0.763331	FPKM1_group_1330_transcript_2	chr1:119573093-119870538	-	ZNF697	0.429837	0.320695
XLOC_095106	0.156049		0.166166	-0.945029	0.637469	FPKM1_group_23447_transcript_5	chr4:68566997-68995598	-	YTHDC1	0.127359	0.142906
XLOC_076847	0.156049		-0.250311	-1.02692	0.467606	FPKM1_group_19094_transcript_1	chr20:31991161-31992472	-	CDK5RAP1	0.337708	0.283916
XLOC_049789	0.156049		0.704107	0.260557	0.928101	FPKM1_group_11930_transcript_2,FPKM1_group_11930_transcript_3,FPKM1_group_11930_transcript_4	chr16:75320704-75322892	-	BCAR1	0.0958184	0.156101
XLOC_097442	0.156049		-1.60802	-0.649529		FPKM1_group_24461_transcript_1	chr4:174045558-174250845	-	HMGB2	0.210036	0.0689021
XLOC_092014	0.156049		-1.24471	0.0895445	0.978792	FPKM1_group_23395_transcript_1	chr4:57811720-57812681	+	POLR2B	0.19801	0.0835589
XLOC_138032	0.156049		0.931561	-0.000282192	0.999987	FPKM1_group_35585_transcript_1	chrY:59002779-59003952	-	EIF1AY	0.159707	0.304616
XLOC_120873	0.156049		-0.49304	0.125897	0.970049	FPKM1_group_32060_transcript_1	chr8:119728689-119738346	+	AC023590.1	0.672958	0.478154
XLOC_135109	0.156049		-1.30505	-0.304649	0.8165	FPKM1_group_34737_transcript_2	chrX:73164158-73513409	-	SLC16A2	0.186091	0.0753126
XLOC_132300	0.156049		0.734082	-0.578369	0.747004	FPKM1_group_34705_transcript_4	chrX:70573874-70574523	+	TAF1	0.236057	0.392643
XLOC_134707	0.156049		0.446679	0.150219	0.935871	FPKM1_group_34598_transcript_1	chrX:57198806-57199650	-	SPIN2B	0.98918	1.34815
XLOC_134629	0.156049		-0.916244	-0.576058	0.776517	FPKM1_group_34579_transcript_1	chrX:56600197-56601670	-	UBQLN2	0.109873	0.0582205
XLOC_134517	0.156049		1.46003	0.659899	0.708645	FPKM1_group_34538_transcript_1	chrX:53203924-53204792	-	KDM5C	0.178366	0.49071
XLOC_004807	0.156049		-2.11819	-0.088423		FPKM1_group_105_transcript_1	chr1:11053877-11054408	-	TARDBP	0.154864	0.0356706
XLOC_130864	0.156049		-3.32307	-0.255901	0.931512	FPKM1_group_33896_transcript_1	chr9:129312403-129312897	-	LMX1B,RP11-489N22.3	0.11021	0.0110122
XLOC_129855	0.156049		inf			FPKM1_group_33484_transcript_7	chr9:95804324-95804577	-	C9orf89	0	0.216682
XLOC_006146	0.156049		-0.381106	-0.517446	0.781679	FPKM1_group_551_transcript_4,FPKM1_group_551_transcript_6	chr1:47791181-47792750	-	CMPK1	0.353483	0.271421
XLOC_135812	0.156049		0.000124774	0.334779	0.882277	FPKM1_group_35021_transcript_5	chrX:111006795-111015969	-	ALG13	0.105191	0.1052
XLOC_124265	0.156049		-0.314715	0.379802	0.871725	FPKM1_group_32023_transcript_3	chr8:115704454-115704780	-	TRPS1	0.45438	0.365326
XLOC_000960	0.156049		-1.82296	-0.0143059	0.996248	RP4-534N18.2	chr1:32307619-32410457	+	BAI2	0.325003	0.0918587
XLOC_123676	0.156049		-0.0229221	0.350468	0.880091	FPKM1_group_31755_transcript_1	chr8:91233715-91633220	-	TMEM64	0.106119	0.104446
XLOC_124689	0.156049		-0.115326	0.0800697	0.943428	FPKM1_group_32234_transcript_1	chr8:128806778-129114440	-	MYC	3.53617	3.2645
XLOC_122565	0.156049		0.22484	0.0970139	0.965123	FPKM1_group_31257_transcript_1	chr8:42988991-42990437	-	HGSNAT	0.415428	0.485489
XLOC_122814	0.156049		0.616772	0.204906	0.903154	FPKM1_group_31362_transcript_3	chr8:57862425-57863317	-	IMPAD1	0.250404	0.383979
XLOC_118914	0.156049		-1.58485	-0.0689629	0.984976	FPKM1_group_30600_transcript_1,FPKM1_group_30600_transcript_2	chr7:148626105-148627194	-	EZH2	0.295916	0.0986465
XLOC_006540	0.156049		1.87733	0.815537		FPKM1_group_715_transcript_4	chr1:62679783-62685359	-	USP1	0.0399241	0.146679
XLOC_121836	0.156049		-0.194481	-0.413021	0.828817	FPKM1_group_30940_transcript_4	chr8:16985364-17007298	-	ZDHHC2	0.133637	0.116783
XLOC_121519	0.156049		-1.5581	-0.748012	0.67545	CTA-398F10.2	chr8:8314418-8318847	-	SGK223	0.776746	0.263781
XLOC_115833	-0.156948	0.960849	-0.041553	-0.196387	0.870928	FPKM1_group_29439_transcript_1	chr7:29638410-29782210	-	SCRN1	0.85972	0.835312
XLOC_057312	-0.157553	0.969722	-0.587151	-0.0808895	0.953807	FPKM1_group_13655_transcript_1	chr18:14254299-14254678	-	ZNF519	9.07715	6.04226
XLOC_107209	0.158939		-0.958782	0.274214	0.824468	C6orf183,FPKM1_group_28169_transcript_1	chr6:109486932-109592459	+	CEP57L1	0.109573	0.0563743
XLOC_050663	0.158939		-0.214612	-0.00283575	0.998921	FPKM1_group_12413_transcript_3	chr17:16449415-16451935	+	ZNF287	0.19773	0.1704
XLOC_116780	0.158939		-0.795271	-1.19495	0.38483	FPKM1_group_29812_transcript_8	chr7:65670185-65958561	-	KCTD7,RABGEF1	0.29545	0.170249
XLOC_095263	0.158939		-0.446086	-0.858975	0.514234	FPKM1_group_23493_transcript_1	chr4:74189896-74190284	-	ANKRD17	1.5697	1.15221
XLOC_032588	0.159602		2.58489	0.304474		FPKM1_group_7799_transcript_1	chr13:45996837-46000139	+	SLC25A30	0.0180422	0.108247
XLOC_078335	0.159602		0.323312	0.415117	0.715168	-	chr21:9647828-9702545	+	BAGE2,TPTE	0.82593	1.0334
XLOC_118659	0.159602		1.19851	0.903625	0.0797058	TU_0013212_0	chr7:139246192-139720125	-	PARP12	3.74897	8.60398
XLOC_015407	0.159602		1.55749	2.07741	0.00932643	FPKM1_group_3346_transcript_3	chr10:58114898-58115355	-	ZWINT	0.739885	2.17778
XLOC_077932	0.159602		-0.400647	-0.00922025	0.99694	-	chr20:56013233-56014060	-	RBM38	1.09705	0.831038
XLOC_101916	0.159602		nan	-0.329614		FPKM1_group_25308_transcript_1	chr5:44236548-44236771	-	MRPS30	0.327738	0
XLOC_105211	0.159602		1.61914	-0.789701	0.637673	FPKM1_group_26734_transcript_1,MIR4454,linc-KCNMB1-1	chr5:170171868-170241051	-	RANBP17	0.236581	0.726759
XLOC_031208	0.159602		-1.37476	-0.0861968	0.979535	FPKM1_group_7060_transcript_1,FPKM1_group_7060_transcript_2	chr12:105567073-105806934	-	C12orf75,linc-TCP11L2-2	0.147263	0.0567868
XLOC_012302	0.159602		3.42907	1.96427	0.0489085	linc-LYZL1-2	chr10:29396955-29423384	+	SVIL	0.0822764	0.886193
XLOC_101789	0.159602		-0.272166	-0.109106	0.965661	FPKM1_group_25251_transcript_1,FPKM1_group_25251_transcript_2	chr5:38736156-38845931	-	OSMR	0.253748	0.210122
XLOC_089154	0.159602		0.513672	0.115156	0.972444	FPKM1_group_22024_transcript_1	chr3:133380841-133497850	-	SRPRB	0.464081	0.662559
XLOC_072947	0.159602		0.0655342	0.0660825	0.979704	FPKM1_group_17853_transcript_1,FPKM1_group_17853_transcript_2	chr2:186386647-186387764	-	FSIP2	1.00543	1.05216
XLOC_072048	0.159602		-0.100137	0.36457	0.811458	FPKM1_group_17487_transcript_1	chr2:157030804-157031613	-	GPD2	0.599244	0.559062
XLOC_070501	0.159602		-0.78753	-0.282268	0.874579	AC104655.2,linc-MFSD9-13	chr2:105552759-105720606	-	MRPS9	1.23843	0.717465
XLOC_091571	0.159602		1.53216	1.46565		RP11-472K22.1,linc-PCDH7-2	chr4:29119794-29204392	+	STIM2,linc-STIM2-1	0.0456362	0.131988
XLOC_124140	0.159602		-0.108646	0.409686	0.666228	FPKM1_group_31950_transcript_1	chr8:105602960-107072752	-	OXR1,RP11-395G23.3	1.58741	1.47225
XLOC_068948	0.159602		0.433987	0.127945	0.942443	FPKM1_group_16106_transcript_1,linc-RTN4	chr2:55375051-55397563	-	RPS27A	1.38812	1.8753
XLOC_094618	0.159602		0.132707	0.409562	0.731945	FPKM1_group_23283_transcript_2	chr4:42094184-42094679	-	BEND4	2.52438	2.76761
XLOC_095063	0.159602		-0.335739	0.0677901		FPKM1_group_23426_transcript_2	chr4:68006651-68018844	-	CENPC	0.172885	0.13699
XLOC_101377	0.159602		-0.275745	0.543274	0.831095	FPKM1_group_25067_transcript_1	chr5:20611851-20937800	-	CDH12	0.216107	0.178509
XLOC_095674	0.159602		-0.187665	-0.0526816	0.984976	FPKM1_group_23667_transcript_1,FPKM1_group_23667_transcript_2,FPKM1_group_23669_transcript_2,RP11-576N17.5	chr4:84153757-84169359	-	COQ2	0.581217	0.510324
XLOC_073929	0.159602		-3.06359	0.115156	0.972444	FPKM1_group_18264_transcript_2	chr2:214149112-215548970	-	BARD1	0.166107	0.0198681
XLOC_128108	0.159602		-2.23716	-1.67702	0.312416	FPKM1_group_32820_transcript_2	chr9:22636864-22824212	-	CDKN2A	0.26105	0.0553698
XLOC_055269	0.159602		0.551433	0.14856	0.936113	FPKM1_group_13209_transcript_2	chr17:66217732-66218618	-	AMZ2	0.809168	1.18587
XLOC_125852	0.159602		0.914838	-0.102788	0.956615	-	chr9:35765938-35766367	+	MSMP	3.67506	6.92879
XLOC_051758	0.159602		-0.161225	0.159236	0.917275	CTD-2319I12.2	chr17:58156630-58169246	+	HEATR6	0.518369	0.46356
XLOC_054545	0.159602		-0.693099	-0.439458	0.807264	-	chr17:46791331-46793333	-	PRAC1	0.242236	0.149829
XLOC_124659	0.159602		-0.950293	-0.484061	0.778928	TU_0099884_0	chr8:128128655-128241550	-	MYC	0.341067	0.176512
XLOC_111378	0.159602		-3.88469	-3.46753	0.00381326	FPKM1_group_28378_transcript_4	chr6:126466280-126466804	-	TRMT11	1.151	0.0779236
XLOC_083526	0.159602		0.806331	0.593318	0.665813	FPKM1_group_21199_transcript_4	chr3:48550338-48554427	+	SHISA5	0.157184	0.274877
XLOC_108631	0.159602		nan	0.317474		FPKM1_group_27254_transcript_1	chr6:17275276-17278078	-	RBM24	0.119741	0
XLOC_029437	0.159602		-0.140667	0.401955	0.880285	FPKM1_group_6238_transcript_1	chr12:53641320-53641527	-	MFSD5	1.08936	0.988154
XLOC_001770	0.159602		-0.732922	-0.848251	0.471603	FPKM1_group_869_transcript_6	chr1:77692450-77694222	+	PIGK	0.320251	0.19269
XLOC_136421	0.159602		2.3009	0.91706	0.657918	FPKM1_group_35260_transcript_1	chrX:125400520-125400857	-	STAG2	0.0387696	0.191043
XLOC_108436	0.159602		-0.248958	-0.701063	0.643584	FPKM1_group_27131_transcript_1	chr6:12237243-12238086	-	HIVEP1,RP11-456H18.2,linc-HIVEP1-1	0.218303	0.183703
XLOC_025464	0.159602		0.510789	0.088462	0.963358	RP11-266K4.9	chr12:8384854-8395544	+	CLEC4A,FAM66C,ZNF705A	1.19562	1.70355
XLOC_029007	0.159602		nan	-0.624229		FPKM1_group_6107_transcript_4	chr12:45566120-45566445	-	ANO6	0.161698	0
XLOC_021718	0.159602		1.96263	1.11821	0.490662	FPKM1_group_4467_transcript_2	chr11:28373635-28548908	-	KIF18A	0.0593325	0.231262
XLOC_129996	-0.160239	0.955481	0.0323513	-0.779157	0.132719	FPKM1_group_33531_transcript_1,FPKM1_group_33548_transcript_4,FPKM1_group_33548_transcript_5,FPKM1_group_33548_transcript_6,LINC00476	chr9:98521512-98777291	-	ERCC6L2	3.25251	3.32627
XLOC_075870	0.164255	0.978155	-0.996174	-1.30959	0.123585	-	chr20:61505522-61507370	+	TCFL5	1.78802	0.896386
XLOC_079166	-0.164704	0.969722	-0.82051	-0.115673	0.941697	AF127936.7,FPKM1_group_19846_transcript_1,FPKM1_group_19847_transcript_1,FPKM1_group_19848_transcript_4	chr21:16188838-16254296	-	NRIP1	0.32318	0.182998
XLOC_101873	-0.166657	0.970117	0.465042	0.632262	0.310798	CTD-2201E18.3,FPKM1_group_25289_transcript_1,FPKM1_group_25290_transcript_1,linc-C5orf39,linc-SEPP1-1	chr5:43012799-43280952	-	HMGCS1	6.7094	9.26136
XLOC_129920	0.172312	0.970859	-0.275809	0.22317	0.824056	FPKM1_group_33515_transcript_3	chr9:96928570-96966850	-	ZNF169	0.808417	0.667742
XLOC_042806	0.172914	0.976325	-3.78926	-2.31863		-	chr15:31195662-31195918	-	FAN1,RP11-540B6.6	2.38516	0.17252
XLOC_021222	-0.173002	0.979368	-0.905311	-0.419538	0.764099	CTD-2003C8.2,linc-ZBED5-2	chr11:10830843-10932005	-	EIF4G2,SNORD97	0.616622	0.329225
XLOC_133860	0.173181		0.130687	1.03184	0.508297	FPKM1_group_34325_transcript_3	chrX:19005369-19006102	-	PHKA2	0.101764	0.111413
XLOC_128503	0.173181		1.72092	0.33124		FPKM1_group_32995_transcript_1	chr9:34084329-34127397	-	UBAP1	0.161752	0.53321
XLOC_124170	0.173181		-1.42354	-0.906635	0.656124	FPKM1_group_31961_transcript_5,FPKM1_group_31961_transcript_6	chr8:109502988-109504577	-	EMC2	0.188175	0.070151
XLOC_070781	0.173181		-2.05079	0.744977		FPKM1_group_16930_transcript_1	chr2:112893178-112893811	-	TMEM87B	0.119018	0.0287252
XLOC_006201	0.173181		0.741739	0.132345	0.962154	FPKM1_group_570_transcript_1	chr1:51441716-51480063	-	CDKN2C	1.81382	3.03306
XLOC_011710	0.173181		0.613685	0.21188		FPKM1_group_2689_transcript_3	chr1:242082641-242086338	-	EXO1	0.134189	0.20533
XLOC_124146	0.173181		-0.0483753	0.638616	0.502007	FPKM1_group_31953_transcript_1	chr8:105602960-107072752	-	OXR1,RP11-395G23.3	0.807236	0.780617
XLOC_010589	0.173181		-1.16057	0.567852		FPKM1_group_2235_transcript_1	chr1:211769950-211770423	-	SLC30A1	0.141431	0.0632669
XLOC_039039	0.173181		0.0585229	0.319529	0.910795	FPKM1_group_9052_transcript_1	chr14:57279900-57618895	-	AP5M1	0.109105	0.113622
XLOC_022279	0.173181		nan	0.428082	0.860244	FPKM1_group_4627_transcript_1	chr11:47953632-47953966	-	PTPRJ	0.2945	0
XLOC_112609	0.173181		3.07948	0.839417	0.678383	FPKM1_group_28941_transcript_1	chr6:169547895-169548522	-	WDR27	0.0373809	0.315985
XLOC_037627	0.173181		1.67761	0.956786	0.631182	CTD-2134A5.3,linc-TDRD9-2	chr14:104314057-104346670	+	PPP1R13B	0.0457309	0.146292
XLOC_011822	0.173181		-0.519357	-0.0187461	0.996248	FPKM1_group_2723_transcript_2	chr1:246838660-246839137	-	SCCPDH	0.227374	0.158635
XLOC_028808	0.173181		-0.946332	0.181214		FPKM1_group_6024_transcript_1	chr12:31903113-31932287	-	AMN1	0.263608	0.1368
XLOC_124866	0.173181		-0.925782	-0.00630251	0.998577	FPKM1_group_32333_transcript_2	chr8:135812889-135815995	-	ZFAT	0.297927	0.156827
XLOC_045563	0.173181		0.978237	0.171831		FPKM1_group_11088_transcript_3	chr15:100913143-101085200	-	ASB7	0.0867917	0.170985
XLOC_042290	0.173181		0.765673	1.3308	0.420036	FPKM1_group_11041_transcript_1	chr15:99058414-99059457	+	SYNM,linc-SYNM-1	0.591035	1.00486
XLOC_059710	0.173181		-2.07212	-1.11058	0.575794	-	chr19:30213532-30214896	+	C19orf12	0.155107	0.0368861
XLOC_011064	0.173181		1.86172	-0.048867	0.9889	FPKM1_group_2426_transcript_1	chr1:226320768-226321841	-	ACBD3	0.122054	0.443594
XLOC_045185	0.173181		0.624884	0.0909489	0.979535	FPKM1_group_10855_transcript_1	chr15:93143783-93353114	-	AC013394.2,CHD2,MIR3175	0.204718	0.315693
XLOC_112721	0.173181		0.575461	0.387678	0.789234	-	chr7:2476616-2476963	+	CHST12	2.7285	4.06588
XLOC_103288	0.173181		0.520036	0.454049	0.809161	FPKM1_group_25884_transcript_1	chr5:90720032-90721435	-	ARRDC3	0.146519	0.210106
XLOC_108396	0.173181		0.281281	-0.547737	0.80118	FPKM1_group_27109_transcript_2	chr6:11159849-11160524	-	ERVFRD-1	0.186078	0.226136
XLOC_063107	0.173181		2.05821	1.42095	0.34951	FPKM1_group_14965_transcript_2	chr19:49730271-49731645	-	TRPM4	0.16527	0.6883
XLOC_063594	0.173181		0.258311	-0.817876	0.414315	AC016629.3,FPKM1_group_15031_transcript_1	chr19:59070495-59111168	-	UBE2M	0.973315	1.16416
XLOC_044207	0.173181		4.26747	1.17594	0.537551	FPKM1_group_10404_transcript_1,RP11-315D16.4	chr15:68560129-68588203	-	FEM1B	0.0244346	0.470591
XLOC_116794	0.173181		-0.374468	-0.525976	0.729279	FPKM1_group_29817_transcript_2	chr7:65670185-65958561	-	KCTD7,RABGEF1	0.923903	0.71269
XLOC_043029	0.173181		-2.04528	-1.45784		FPKM1_group_9966_transcript_1	chr15:35838395-36151202	-	DPH6	0.190424	0.046135
XLOC_008040	0.173181		0.187915	0.324333	0.881304	FPKM1_group_1331_transcript_1	chr1:119573093-119870538	-	ZNF697	0.94289	1.07406
